# Supplementary material
Source: PubMed Central journal article supplement (PMC4012493)
Supplement: supp_114.161463_161463SI.pdf [file supp_114.161463_161463SI.pdf]

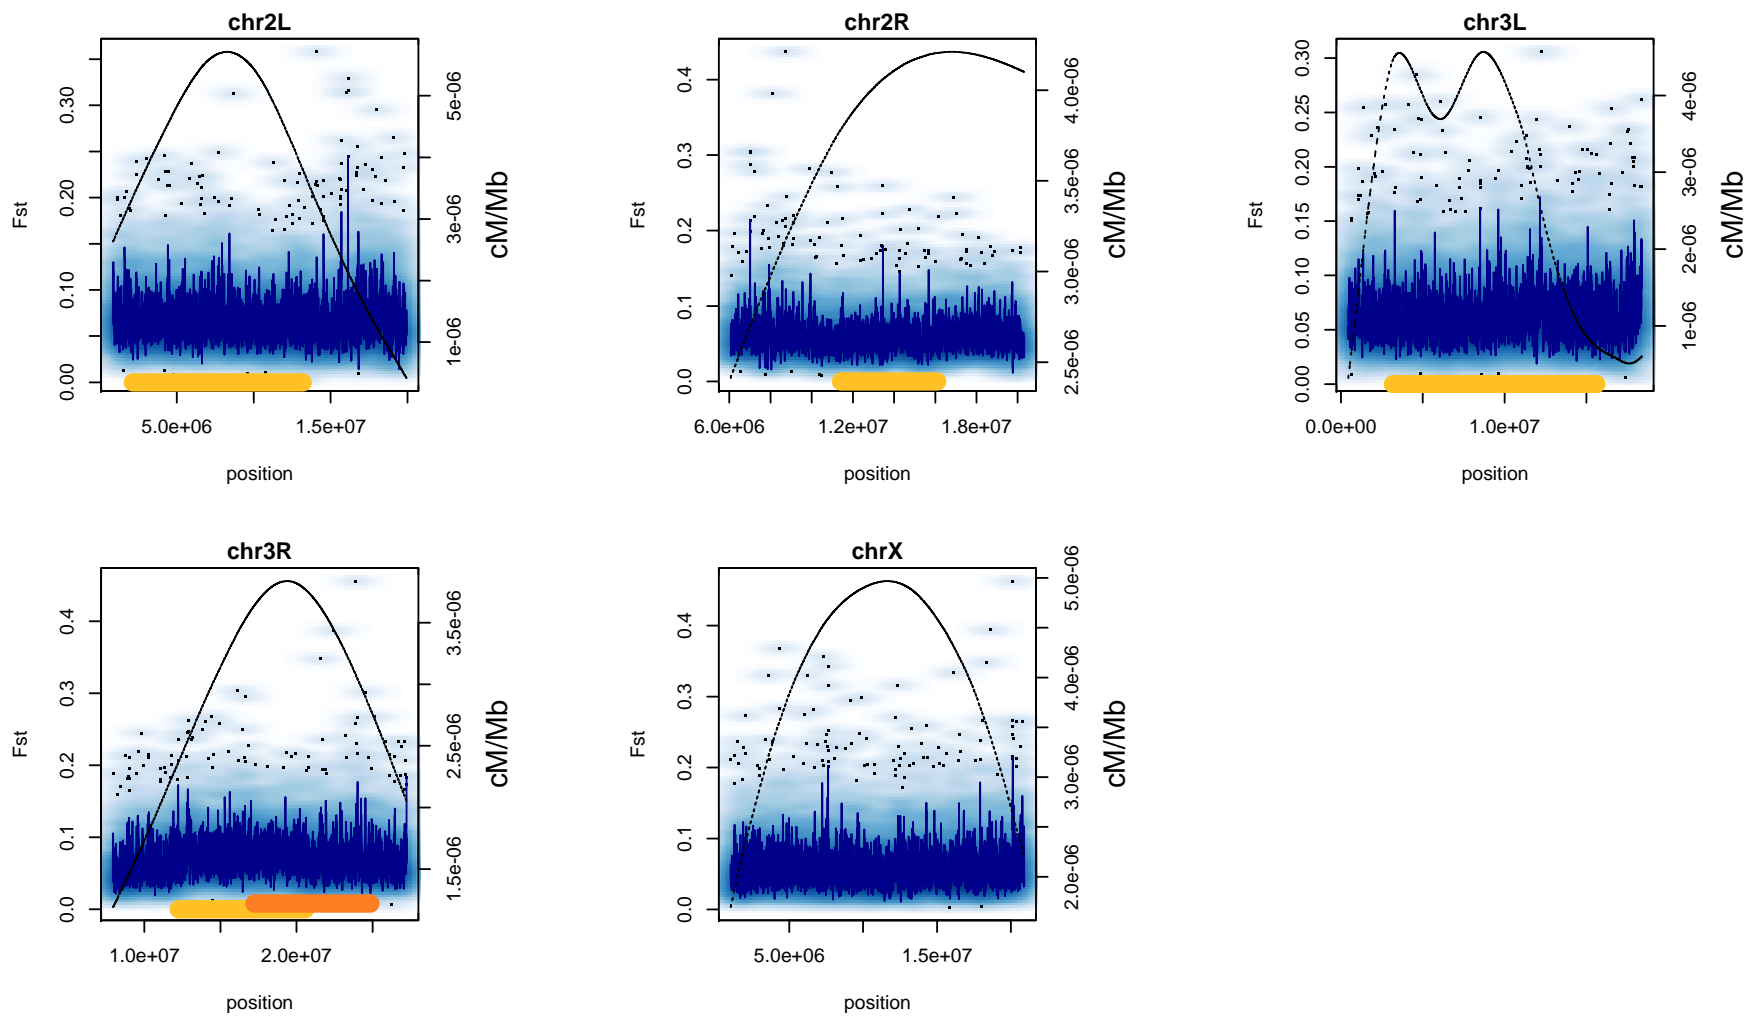

**Figure S1** Australian cline Fst across chromosome arms

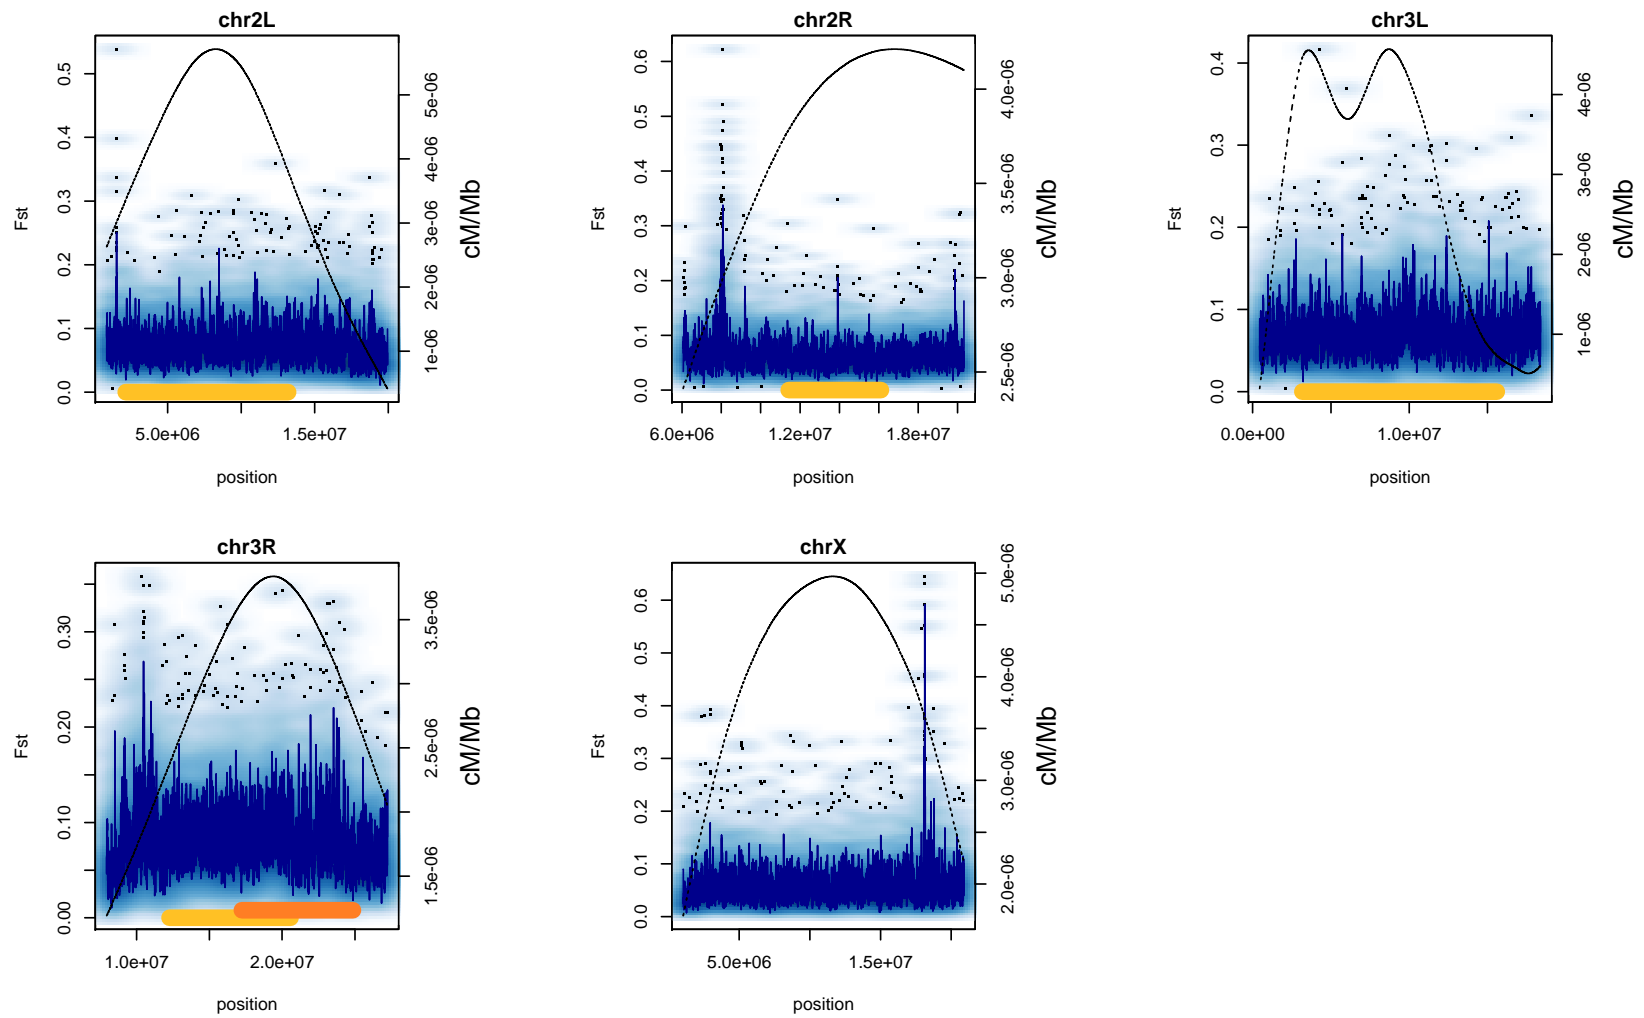

**Figure S2** North American cline Fst across chromosome arms

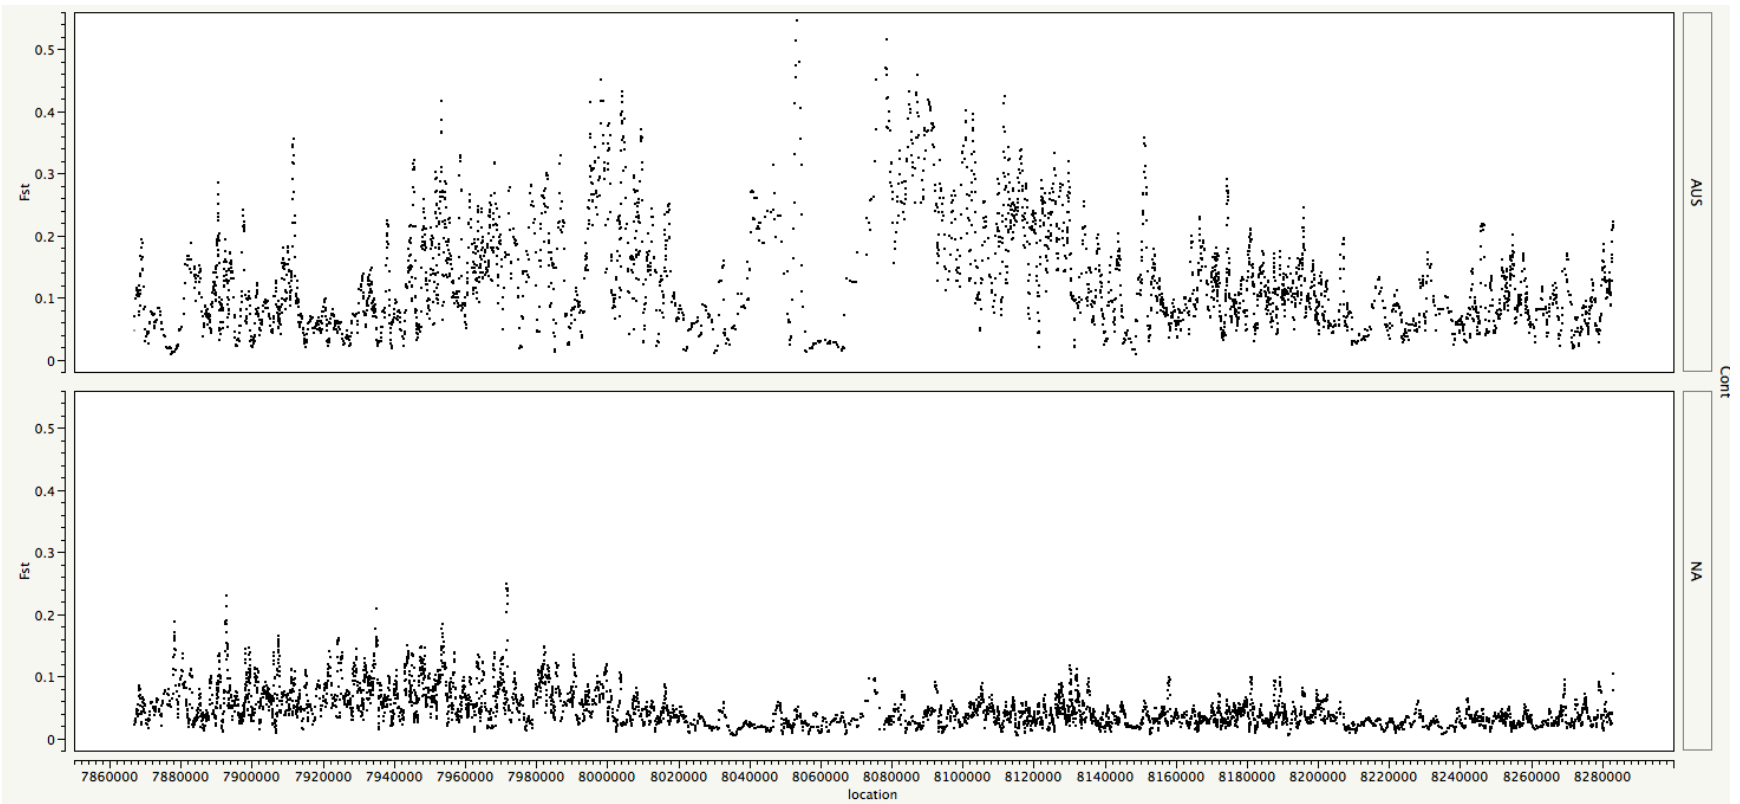

**Figure S3** Comparison of Fst between continents in Cyp6G1 region

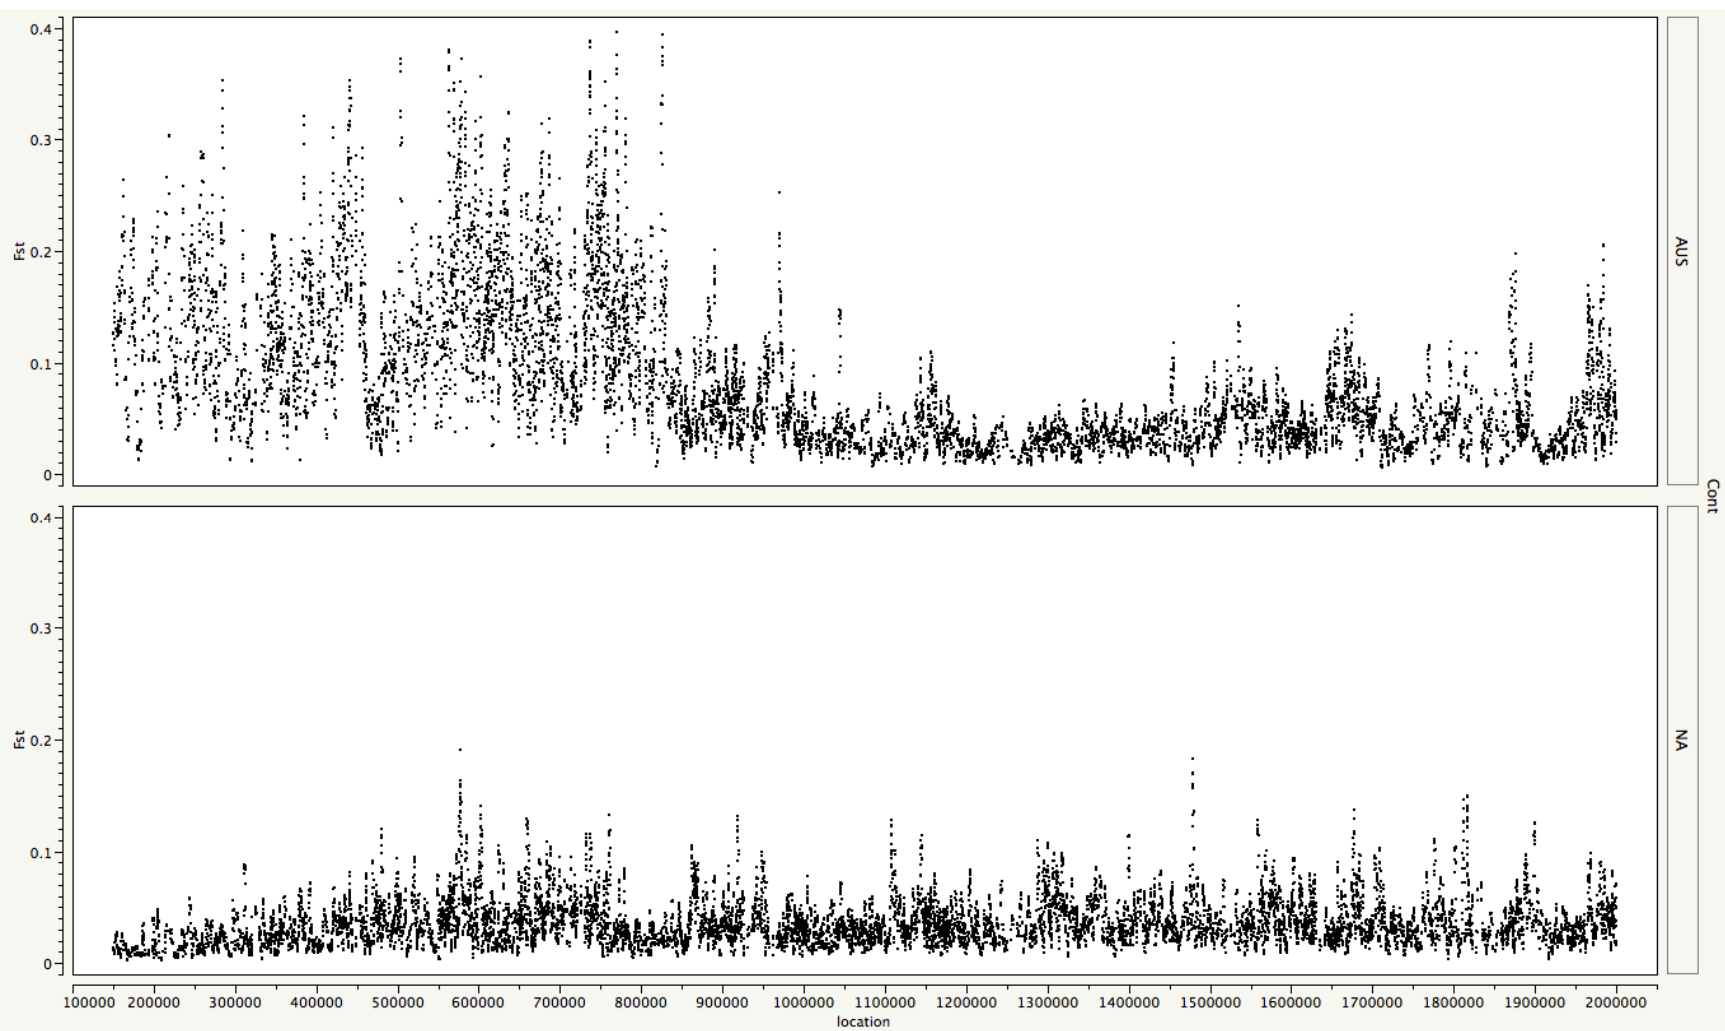

**Figure S4** Comparison of Fst between continents at tip of chromosome X

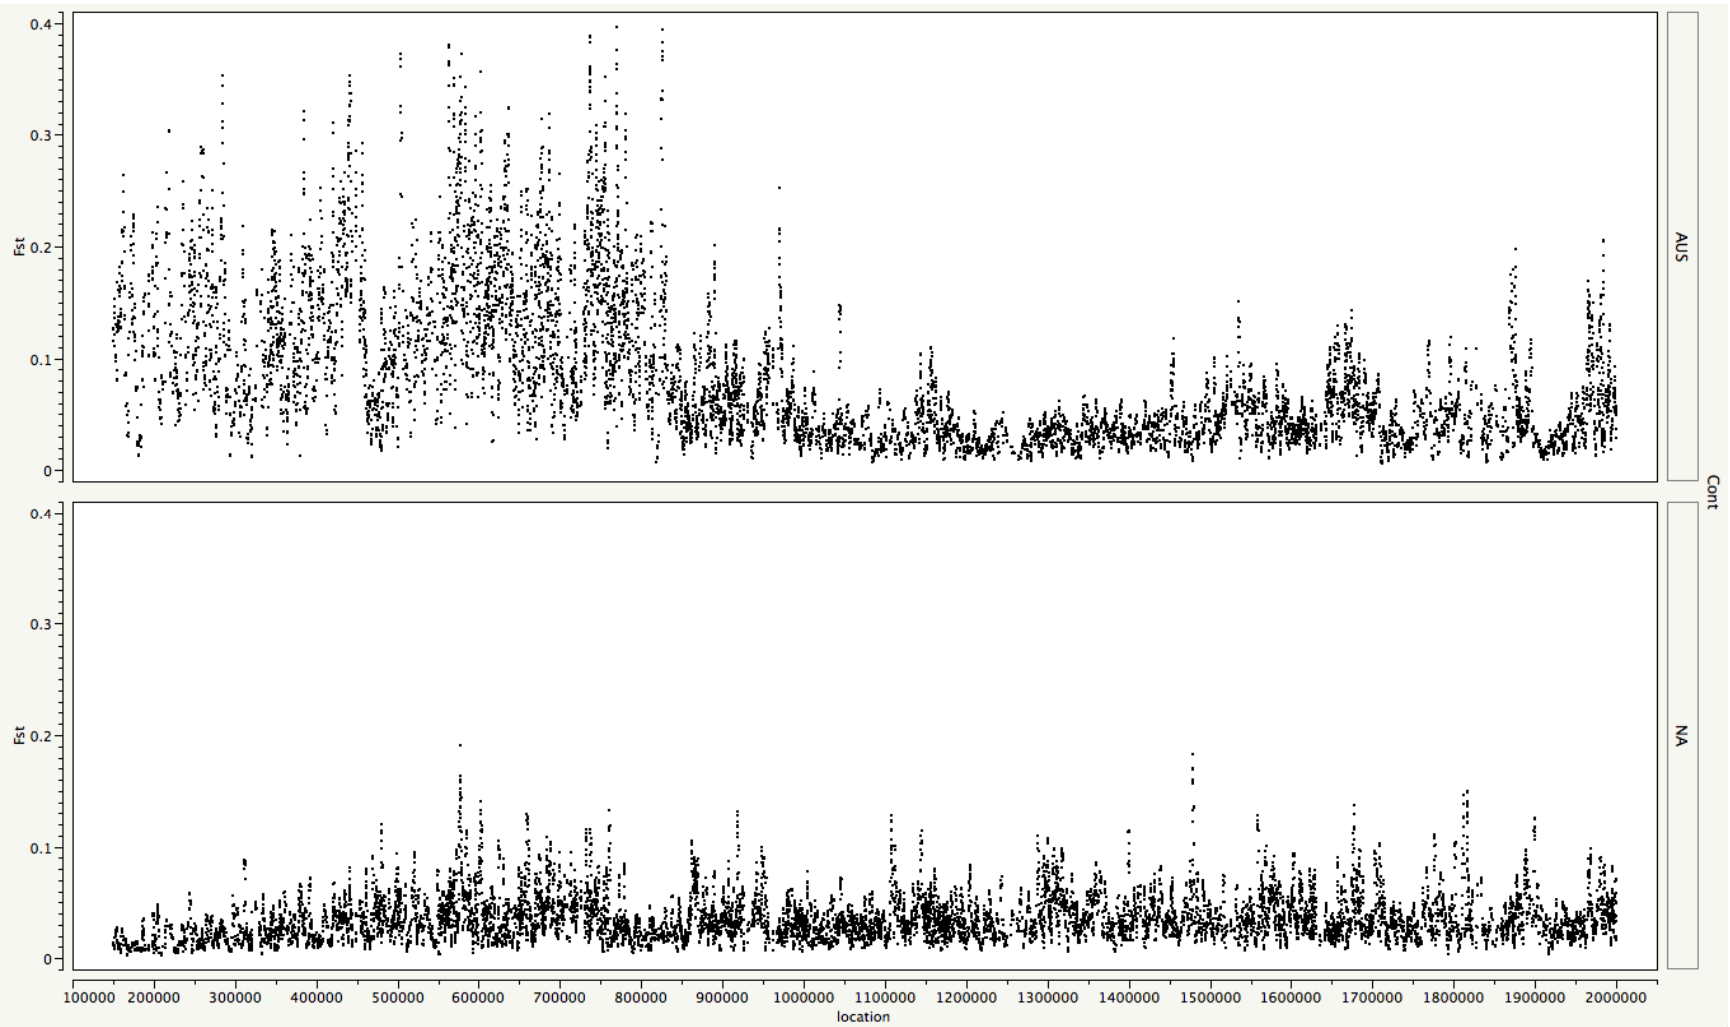

**Figure S5** Comparison of Fst between continents in Upd2 region

**Table S1 GO term enrichment for biological process in the Australian cline for genes that overlap windows in the top 1% tail of Fst.**

| GO term    | 1 % Tail Biological Process |                                                    |
|------------|-----------------------------|----------------------------------------------------|
|            | q-value                     | description                                        |
| GO:0008355 | 4.99E-06                    | olfactory learning                                 |
| GO:0007611 | 9.11E-06                    | learning or memory                                 |
| GO:0001738 | 9.68E-05                    | morphogenesis of a polarized epithelium            |
| GO:0007156 | 9.68E-05                    | homophilic cell adhesion                           |
| GO:0008285 | 9.68E-05                    | negative regulation of cell proliferation          |
| GO:0007165 | 9.68E-05                    | signal transduction                                |
| GO:0007306 | 1.74E-04                    | eggshell chorion assembly                          |
| GO:0007507 | 2.37E-04                    | heart development                                  |
| GO:0007427 | 2.68E-04                    | epithelial cell migration, open tracheal system    |
| GO:0051276 | 3.00E-04                    | chromosome organization                            |
| GO:0008104 | 3.08E-04                    | protein localization                               |
| GO:0017148 | 3.71E-04                    | negative regulation of translation                 |
| GO:0007623 | 4.62E-04                    | circadian rhythm                                   |
| GO:0007155 | 6.08E-04                    | cell adhesion                                      |
| GO:0006811 | 6.12E-04                    | ion transport                                      |
| GO:0002009 | 7.72E-04                    | morphogenesis of an epithelium                     |
| GO:0007424 | 8.38E-04                    | open tracheal system development                   |
| GO:0048477 | 9.93E-04                    | oogenesis                                          |
| GO:0007391 | 1.23E-03                    | dorsal closure                                     |
| GO:0007435 | 1.23E-03                    | salivary gland morphogenesis                       |
| GO:0045475 | 1.36E-03                    | locomotor rhythm                                   |
| GO:0006355 | 1.37E-03                    | regulation of transcription, DNA-dependent         |
| GO:0007275 | 1.37E-03                    | multicellular organismal development               |
| GO:0006468 | 1.73E-03                    | protein amino acid phosphorylation                 |
| GO:0007476 | 4.39E-03                    | imaginal disc-derived wing morphogenesis           |
| GO:0002121 | 6.46E-03                    | inter-male aggressive behavior                     |
| GO:0006813 | 6.60E-03                    | potassium ion transport                            |
| GO:0048749 | 9.21E-03                    | compound eye development                           |
| GO:0045449 | 1.17E-02                    | regulation of transcription                        |
| GO:0007411 | 1.24E-02                    | axon guidance                                      |
| GO:0016319 | 1.38E-02                    | mushroom body development                          |
| GO:0007298 | 1.40E-02                    | border follicle cell migration                     |
| GO:0001700 | 1.87E-02                    | embryonic development via the syncytial blastoderm |
| GO:0007015 | 2.28E-02                    | actin filament organization                        |
| GO:0001745 | 2.73E-02                    | compound eye morphogenesis                         |
| GO:0006814 | 2.94E-02                    | sodium ion transport                               |
| GO:0008360 | 4.19E-02                    | regulation of cell shape                           |
| GO:0055085 | 4.19E-02                    | transmembrane transport                            |
| GO:0007269 | 4.73E-02                    | neurotransmitter secretion                         |
| GO:0016192 | 4.95E-02                    | vesicle-mediated transport                         |

**Table S2 GO term enrichment for biological process in the Australian cline for genes that overlap windows in the top 2.5% tail of Fst.**

| 2.5 % Tail Biological Process |          |                                                     |
|-------------------------------|----------|-----------------------------------------------------|
| GO term                       | q-value  | description                                         |
| GO:0006355                    | 2.24E-07 | regulation of transcription, DNA-dependent          |
| GO:0007611                    | 1.26E-06 | learning or memory                                  |
| GO:0006468                    | 1.26E-06 | protein amino acid phosphorylation                  |
| GO:0008543                    | 3.05E-06 | fibroblast growth factor receptor signaling pathway |
| GO:0007476                    | 3.11E-06 | imaginal disc-derived wing morphogenesis            |
| GO:0008284                    | 3.49E-06 | positive regulation of cell proliferation           |
| GO:0007424                    | 5.44E-06 | open tracheal system development                    |
| GO:0008355                    | 1.11E-05 | olfactory learning                                  |
| GO:0007156                    | 1.56E-05 | homophilic cell adhesion                            |
| GO:0007435                    | 1.87E-05 | salivary gland morphogenesis                        |
| GO:0007155                    | 1.87E-05 | cell adhesion                                       |
| GO:0007275                    | 1.87E-05 | multicellular organismal development                |
| GO:0007507                    | 1.87E-05 | heart development                                   |
| GO:0046331                    | 1.87E-05 | lateral inhibition                                  |
| GO:0007280                    | 4.39E-05 | pole cell migration                                 |
| GO:0007513                    | 4.39E-05 | pericardial cell differentiation                    |
| GO:0007427                    | 4.39E-05 | epithelial cell migration, open tracheal system     |
| GO:0008406                    | 4.76E-05 | gonad development                                   |
| GO:0048190                    | 4.98E-05 | wing disc dorsal/ventral pattern formation          |
| GO:0007411                    | 5.20E-05 | axon guidance                                       |
| GO:0048477                    | 7.54E-05 | oogenesis                                           |
| GO:0007623                    | 1.42E-04 | circadian rhythm                                    |
| GO:0048749                    | 1.42E-04 | compound eye development                            |
| GO:0008104                    | 1.70E-04 | protein localization                                |
| GO:0007391                    | 2.08E-04 | dorsal closure                                      |
| GO:0007419                    | 2.14E-04 | ventral cord development                            |
| GO:0007398                    | 3.20E-04 | ectoderm development                                |
| GO:0045475                    | 3.20E-04 | locomotor rhythm                                    |
| GO:0001751                    | 3.20E-04 | compound eye photoreceptor cell differentiation     |
| GO:0001738                    | 3.82E-04 | morphogenesis of a polarized epithelium             |
| GO:0008345                    | 3.82E-04 | larval locomotory behavior                          |
| GO:0007509                    | 4.07E-04 | mesoderm migration                                  |
| GO:0007498                    | 4.07E-04 | mesoderm development                                |
| GO:0035225                    | 4.07E-04 | determination of genital disc primordium            |
| GO:0008354                    | 4.07E-04 | germ cell migration                                 |
| GO:0007617                    | 4.07E-04 | mating behavior                                     |
| GO:0006811                    | 4.92E-04 | ion transport                                       |
| GO:0007219                    | 4.92E-04 | Notch signaling pathway                             |

|            |          |                                                                                    |
|------------|----------|------------------------------------------------------------------------------------|
| GO:0007428 | 5.97E-04 | primary branching, open tracheal system                                            |
| GO:0007274 | 6.14E-04 | neuromuscular synaptic transmission                                                |
| GO:0008356 | 6.14E-04 | asymmetric cell division                                                           |
| GO:0051225 | 6.14E-04 | spindle assembly                                                                   |
| GO:0045433 | 7.31E-04 | male courtship behavior, veined wing generated song production                     |
| GO:0045187 | 7.31E-04 | regulation of circadian sleep/wake cycle, sleep                                    |
| GO:0010552 | 7.31E-04 | positive regulation of gene-specific transcription from RNA polymerase II promoter |
| GO:0016477 | 8.59E-04 | cell migration                                                                     |
| GO:0008285 | 8.59E-04 | negative regulation of cell proliferation                                          |
| GO:0007480 | 8.59E-04 | imaginal disc-derived leg morphogenesis                                            |
| GO:0007165 | 8.59E-04 | signal transduction                                                                |
| GO:0002121 | 8.89E-04 | inter-male aggressive behavior                                                     |
| GO:0042127 | 1.20E-03 | regulation of cell proliferation                                                   |
| GO:0048675 | 1.20E-03 | axon extension                                                                     |
| GO:0008407 | 1.20E-03 | bristle morphogenesis                                                              |
| GO:0007622 | 1.20E-03 | rhythmic behavior                                                                  |
| GO:0016079 | 1.20E-03 | synaptic vesicle exocytosis                                                        |
| GO:0008344 | 1.24E-03 | adult locomotory behavior                                                          |
| GO:0001709 | 1.24E-03 | cell fate determination                                                            |
| GO:0008347 | 1.24E-03 | glial cell migration                                                               |
| GO:0007494 | 1.64E-03 | midgut development                                                                 |
| GO:0002009 | 1.64E-03 | morphogenesis of an epithelium                                                     |
| GO:0035023 | 1.64E-03 | regulation of Rho protein signal transduction                                      |
| GO:0045449 | 1.71E-03 | regulation of transcription                                                        |
| GO:0007268 | 1.77E-03 | synaptic transmission                                                              |
| GO:0016360 | 1.77E-03 | sensory organ precursor cell fate determination                                    |
| GO:0007390 | 1.77E-03 | germ-band shortening                                                               |
| GO:0007475 | 1.77E-03 | apposition of dorsal and ventral imaginal disc-derived wing surfaces               |
| GO:0000902 | 1.77E-03 | cell morphogenesis                                                                 |
| GO:0055085 | 1.77E-03 | transmembrane transport                                                            |
| GO:0008049 | 2.57E-03 | male courtship behavior                                                            |
| GO:0007431 | 2.57E-03 | salivary gland development                                                         |
| GO:0030707 | 2.66E-03 | ovarian follicle cell development                                                  |
| GO:0008340 | 3.61E-03 | determination of adult lifespan                                                    |
| GO:0042052 | 3.61E-03 | rhabdomere development                                                             |
| GO:0007314 | 3.61E-03 | oocyte anterior/posterior axis specification                                       |
| GO:0007298 | 3.68E-03 | border follicle cell migration                                                     |
| GO:0007306 | 4.11E-03 | eggshell chorion assembly                                                          |
| GO:0051017 | 4.11E-03 | actin filament bundle formation                                                    |
| GO:0001745 | 4.11E-03 | compound eye morphogenesis                                                         |
| GO:0008587 | 4.11E-03 | imaginal disc-derived wing margin morphogenesis                                    |
| GO:0016055 | 4.73E-03 | Wnt receptor signaling pathway                                                     |
| GO:0030162 | 4.75E-03 | regulation of proteolysis                                                          |



|            |          |                                                             |
|------------|----------|-------------------------------------------------------------|
| GO:0030718 | 4.82E-03 | germ-line stem cell maintenance                             |
| GO:0035277 | 5.70E-03 | spiracle morphogenesis, open tracheal system                |
| GO:0008103 | 5.70E-03 | oocyte microtubule cytoskeleton polarization                |
| GO:0006914 | 5.70E-03 | autophagy                                                   |
| GO:0035147 | 5.70E-03 | branch fusion, open tracheal system                         |
| GO:0007269 | 6.05E-03 | neurotransmitter secretion                                  |
| GO:0007367 | 6.05E-03 | segment polarity determination                              |
| GO:0007619 | 6.05E-03 | courtship behavior                                          |
| GO:0008586 | 7.37E-03 | imaginal disc-derived wing vein morphogenesis               |
| GO:0051276 | 7.37E-03 | chromosome organization                                     |
| GO:0007616 | 7.37E-03 | long-term memory                                            |
| GO:0009408 | 7.37E-03 | response to heat                                            |
| GO:0006816 | 7.37E-03 | calcium ion transport                                       |
| GO:0019991 | 7.37E-03 | septate junction assembly                                   |
| GO:0007455 | 7.37E-03 | eye-antennal disc morphogenesis                             |
| GO:0007552 | 7.37E-03 | metamorphosis                                               |
| GO:0045892 | 7.50E-03 | negative regulation of transcription, DNA-dependent         |
| GO:0006813 | 7.95E-03 | potassium ion transport                                     |
| GO:0016319 | 8.34E-03 | mushroom body development                                   |
| GO:0008293 | 9.71E-03 | torso signaling pathway                                     |
| GO:0017148 | 9.77E-03 | negative regulation of translation                          |
| GO:0042078 | 9.77E-03 | germ-line stem cell division                                |
| GO:0033227 | 1.23E-02 | dsRNA transport                                             |
| GO:0007426 | 1.31E-02 | tracheal outgrowth, open tracheal system                    |
| GO:0046843 | 1.35E-02 | dorsal appendage formation                                  |
| GO:0007417 | 1.48E-02 | central nervous system development                          |
| GO:0045893 | 1.51E-02 | positive regulation of transcription, DNA-dependent         |
| GO:0006897 | 1.51E-02 | endocytosis                                                 |
| GO:0042067 | 1.67E-02 | establishment of ommatidial polarity                        |
| GO:0007444 | 1.88E-02 | imaginal disc development                                   |
| GO:0007242 | 1.98E-02 | intracellular signaling cascade                             |
| GO:0007399 | 2.06E-02 | nervous system development                                  |
| GO:0006325 | 2.10E-02 | chromatin organization                                      |
| GO:0007422 | 2.11E-02 | peripheral nervous system development                       |
| GO:0008360 | 2.18E-02 | regulation of cell shape                                    |
| GO:0006357 | 2.48E-02 | regulation of transcription from RNA polymerase II promoter |
| GO:0048666 | 2.70E-02 | neuron development                                          |
| GO:0006470 | 3.05E-02 | protein amino acid dephosphorylation                        |
| GO:0007317 | 3.14E-02 | regulation of pole plasm oskar mRNA localization            |
| GO:0007224 | 3.14E-02 | smoothened signaling pathway                                |
| GO:0008045 | 3.14E-02 | motor axon guidance                                         |
| GO:0042048 | 3.15E-02 | olfactory behavior                                          |
| GO:0001700 | 3.33E-02 | embryonic development via the syncytial blastoderm          |
| GO:0007423 | 3.49E-02 | sensory organ development                                   |

|            |          |                                                  |
|------------|----------|--------------------------------------------------|
| GO:0007474 | 3.69E-02 | imaginal disc-derived wing vein specification    |
| GO:0007163 | 3.69E-02 | establishment or maintenance of cell polarity    |
| GO:0007349 | 3.69E-02 | cellularization                                  |
| GO:0007015 | 4.26E-02 | actin filament organization                      |
| GO:0008595 | 4.39E-02 | determination of anterior/posterior axis, embryo |
| GO:0008063 | 4.39E-02 | Toll signaling pathway                           |

---

**Table S3 GO term enrichment for biological process in the Australian cline for genes that overlap windows in the top 5% tail of Fst.**

| GO term    | 5 % Tail Biological Process |                                                     |
|------------|-----------------------------|-----------------------------------------------------|
|            | q-value                     | description                                         |
| GO:0046331 | 0.00E+00                    | lateral inhibition                                  |
| GO:0016198 | 0.00E+00                    | axon choice point recognition                       |
| GO:0006355 | 4.83E-10                    | regulation of transcription, DNA-dependent          |
| GO:0007156 | 5.44E-08                    | homophilic cell adhesion                            |
| GO:0007411 | 5.39E-07                    | axon guidance                                       |
| GO:0006468 | 5.53E-07                    | protein amino acid phosphorylation                  |
| GO:0048190 | 2.06E-06                    | wing disc dorsal/ventral pattern formation          |
| GO:0007611 | 2.06E-06                    | learning or memory                                  |
| GO:0007476 | 2.67E-06                    | imaginal disc-derived wing morphogenesis            |
| GO:0008284 | 6.75E-06                    | positive regulation of cell proliferation           |
| GO:0042051 | 8.05E-06                    | compound eye photoreceptor development              |
| GO:0008543 | 9.53E-06                    | fibroblast growth factor receptor signaling pathway |
| GO:0007165 | 1.17E-05                    | signal transduction                                 |
| GO:0048477 | 3.51E-05                    | oogenesis                                           |
| GO:0008355 | 4.04E-05                    | olfactory learning                                  |
| GO:0007398 | 4.34E-05                    | ectoderm development                                |
| GO:0007424 | 4.98E-05                    | open tracheal system development                    |
| GO:0007507 | 5.28E-05                    | heart development                                   |
| GO:0007498 | 7.16E-05                    | mesoderm development                                |
| GO:0001709 | 7.16E-05                    | cell fate determination                             |
| GO:0048749 | 7.16E-05                    | compound eye development                            |
| GO:0002009 | 7.48E-05                    | morphogenesis of an epithelium                      |
| GO:0007415 | 8.57E-05                    | defasciculation of motor neuron axon                |
| GO:0007513 | 1.10E-04                    | pericardial cell differentiation                    |
| GO:0045570 | 1.10E-04                    | regulation of imaginal disc growth                  |
| GO:0007552 | 1.54E-04                    | metamorphosis                                       |
| GO:0008104 | 1.73E-04                    | protein localization                                |
| GO:0007155 | 2.35E-04                    | cell adhesion                                       |
| GO:0007419 | 2.35E-04                    | ventral cord development                            |
| GO:0008045 | 2.35E-04                    | motor axon guidance                                 |
| GO:0007427 | 2.35E-04                    | epithelial cell migration, open tracheal system     |
| GO:0055085 | 2.42E-04                    | transmembrane transport                             |
| GO:0007623 | 2.42E-04                    | circadian rhythm                                    |
| GO:0007391 | 2.42E-04                    | dorsal closure                                      |
| GO:0008406 | 2.46E-04                    | gonad development                                   |
| GO:0008356 | 2.62E-04                    | asymmetric cell division                            |
| GO:0048096 | 2.66E-04                    | chromatin-mediated maintenance of transcription     |
| GO:0035286 | 2.66E-04                    | leg segmentation                                    |
| GO:0046667 | 2.66E-04                    | compound eye retinal cell programmed cell death     |
| GO:0048814 | 2.66E-04                    | regulation of dendrite morphogenesis                |

|            |          |                                                                |
|------------|----------|----------------------------------------------------------------|
| GO:0045433 | 2.80E-04 | male courtship behavior, veined wing generated song production |
| GO:0007275 | 3.42E-04 | multicellular organismal development                           |
| GO:0008586 | 3.43E-04 | imaginal disc-derived wing vein morphogenesis                  |
| GO:0007314 | 4.38E-04 | oocyte anterior/posterior axis specification                   |
| GO:0042052 | 4.38E-04 | rhabdomere development                                         |
| GO:0008285 | 4.38E-04 | negative regulation of cell proliferation                      |
| GO:0007413 | 4.87E-04 | axonal fasciculation                                           |
| GO:0008407 | 4.87E-04 | bristle morphogenesis                                          |
| GO:0008354 | 5.13E-04 | germ cell migration                                            |
| GO:0007435 | 5.78E-04 | salivary gland morphogenesis                                   |
| GO:0006816 | 6.54E-04 | calcium ion transport                                          |
| GO:0046620 | 6.77E-04 | regulation of organ growth                                     |
| GO:0006811 | 6.97E-04 | ion transport                                                  |
| GO:0001751 | 7.25E-04 | compound eye photoreceptor cell differentiation                |
| GO:0042127 | 7.25E-04 | regulation of cell proliferation                               |
| GO:0007444 | 7.78E-04 | imaginal disc development                                      |
| GO:0048100 | 8.18E-04 | wing disc anterior/posterior pattern formation                 |
| GO:0007617 | 8.18E-04 | mating behavior                                                |
| GO:0035225 | 8.18E-04 | determination of genital disc primordium                       |
| GO:0015012 | 8.18E-04 | heparan sulfate proteoglycan biosynthetic process              |
| GO:0007509 | 8.18E-04 | mesoderm migration                                             |
| GO:0051017 | 8.81E-04 | actin filament bundle formation                                |
| GO:0030206 | 9.69E-04 | chondroitin sulfate biosynthetic process                       |
| GO:0010002 | 9.69E-04 | cardioblast differentiation                                    |
| GO:0009408 | 9.69E-04 | response to heat                                               |
| GO:0045449 | 9.76E-04 | regulation of transcription                                    |
| GO:0007274 | 1.01E-03 | neuromuscular synaptic transmission                            |
| GO:0007619 | 1.08E-03 | courtship behavior                                             |
| GO:0045475 | 1.08E-03 | locomotor rhythm                                               |
| GO:0001738 | 1.23E-03 | morphogenesis of a polarized epithelium                        |
| GO:0008345 | 1.23E-03 | larval locomotory behavior                                     |
| GO:0007298 | 1.23E-03 | border follicle cell migration                                 |
| GO:0007280 | 1.50E-03 | pole cell migration                                            |
| GO:0008347 | 1.50E-03 | glial cell migration                                           |
| GO:0008344 | 1.50E-03 | adult locomotory behavior                                      |
| GO:0035147 | 1.50E-03 | branch fusion, open tracheal system                            |
| GO:0007480 | 1.64E-03 | imaginal disc-derived leg morphogenesis                        |
| GO:0007219 | 1.77E-03 | Notch signaling pathway                                        |
| GO:0045187 | 1.77E-03 | regulation of circadian sleep/wake cycle, sleep                |
| GO:0001745 | 2.13E-03 | compound eye morphogenesis                                     |
| GO:0007428 | 2.37E-03 | primary branching, open tracheal system                        |
| GO:0007268 | 2.43E-03 | synaptic transmission                                          |
| GO:0007390 | 2.45E-03 | germ-band shortening                                           |
| GO:0016331 | 2.45E-03 | morphogenesis of embryonic epithelium                          |

|            |          |                                                                                    |
|------------|----------|------------------------------------------------------------------------------------|
| GO:0009649 | 2.45E-03 | entrainment of circadian clock                                                     |
| GO:0048149 | 2.45E-03 | behavioral response to ethanol                                                     |
| GO:0016332 | 2.45E-03 | establishment or maintenance of polarity of embryonic epithelium                   |
| GO:0016360 | 2.45E-03 | sensory organ precursor cell fate determination                                    |
| GO:0002121 | 2.45E-03 | inter-male aggressive behavior                                                     |
| GO:0030162 | 2.48E-03 | regulation of proteolysis                                                          |
| GO:0007422 | 2.50E-03 | peripheral nervous system development                                              |
| GO:0048675 | 3.39E-03 | axon extension                                                                     |
| GO:0007297 | 3.39E-03 | ovarian follicle cell migration                                                    |
| GO:0007622 | 3.39E-03 | rhythmic behavior                                                                  |
| GO:0007479 | 3.39E-03 | leg disc proximal/distal pattern formation                                         |
| GO:0008340 | 3.46E-03 | determination of adult lifespan                                                    |
| GO:0007010 | 3.46E-03 | cytoskeleton organization                                                          |
| GO:0007474 | 3.50E-03 | imaginal disc-derived wing vein specification                                      |
| GO:0008587 | 3.72E-03 | imaginal disc-derived wing margin morphogenesis                                    |
| GO:0007520 | 3.72E-03 | myoblast fusion                                                                    |
| GO:0016339 | 3.72E-03 | calcium-dependent cell-cell adhesion                                               |
| GO:0007242 | 3.86E-03 | intracellular signaling cascade                                                    |
| GO:0048666 | 4.48E-03 | neuron development                                                                 |
| GO:0006357 | 4.91E-03 | regulation of transcription from RNA polymerase II promoter                        |
| GO:0035172 | 5.04E-03 | hemocyte proliferation                                                             |
| GO:0007549 | 5.04E-03 | dosage compensation                                                                |
| GO:0008105 | 5.75E-03 | asymmetric protein localization                                                    |
| GO:0007475 | 5.75E-03 | apposition of dorsal and ventral imaginal disc-derived wing surfaces               |
| GO:0007399 | 5.75E-03 | nervous system development                                                         |
| GO:0000902 | 5.75E-03 | cell morphogenesis                                                                 |
| GO:0048066 | 5.75E-03 | pigmentation during development                                                    |
| GO:0007525 | 5.75E-03 | somatic muscle development                                                         |
| GO:0045197 | 5.75E-03 | establishment or maintenance of epithelial cell apical/basal polarity              |
| GO:0042048 | 5.87E-03 | olfactory behavior                                                                 |
| GO:0006914 | 5.87E-03 | autophagy                                                                          |
| GO:0035071 | 6.05E-03 | salivary gland cell autophagic cell death                                          |
| GO:0007269 | 6.60E-03 | neurotransmitter secretion                                                         |
| GO:0006813 | 6.78E-03 | potassium ion transport                                                            |
| GO:0008293 | 7.58E-03 | torso signaling pathway                                                            |
| GO:0048813 | 7.58E-03 | dendrite morphogenesis                                                             |
| GO:0007186 | 7.93E-03 | G-protein coupled receptor protein signaling pathway                               |
| GO:0016055 | 8.13E-03 | Wnt receptor signaling pathway                                                     |
| GO:0007455 | 8.84E-03 | eye-antennal disc morphogenesis                                                    |
| GO:0045167 | 8.84E-03 | asymmetric protein localization involved in cell fate determination                |
| GO:0007632 | 8.84E-03 | visual behavior                                                                    |
| GO:0035215 | 8.84E-03 | genital disc development                                                           |
| GO:0010552 | 8.84E-03 | positive regulation of gene-specific transcription from RNA polymerase II promoter |

|            |          |                                                            |
|------------|----------|------------------------------------------------------------|
| GO:0045610 | 8.84E-03 | regulation of hemocyte differentiation                     |
| GO:0007362 | 9.17E-03 | terminal region determination                              |
| GO:0007494 | 1.20E-02 | midgut development                                         |
| GO:0035023 | 1.20E-02 | regulation of Rho protein signal transduction              |
| GO:0016319 | 1.21E-02 | mushroom body development                                  |
| GO:0002168 | 1.31E-02 | instar larval development                                  |
| GO:0008049 | 1.31E-02 | male courtship behavior                                    |
| GO:0051225 | 1.31E-02 | spindle assembly                                           |
| GO:0007431 | 1.31E-02 | salivary gland development                                 |
| GO:0042078 | 1.31E-02 | germ-line stem cell division                               |
| GO:0006812 | 1.38E-02 | cation transport                                           |
| GO:0006897 | 1.38E-02 | endocytosis                                                |
| GO:0030718 | 1.38E-02 | germ-line stem cell maintenance                            |
| GO:0007400 | 1.38E-02 | neuroblast fate determination                              |
| GO:0048542 | 1.38E-02 | lymph gland development                                    |
| GO:0007446 | 1.38E-02 | imaginal disc growth                                       |
| GO:0007306 | 1.38E-02 | eggshell chorion assembly                                  |
| GO:0045186 | 1.40E-02 | zonula adherens assembly                                   |
| GO:0030536 | 1.40E-02 | larval feeding behavior                                    |
| GO:0048800 | 1.40E-02 | antennal morphogenesis                                     |
| GO:0007519 | 1.40E-02 | skeletal muscle tissue development                         |
| GO:0016079 | 1.40E-02 | synaptic vesicle exocytosis                                |
| GO:0007173 | 1.47E-02 | epidermal growth factor receptor signaling pathway         |
| GO:0007291 | 1.52E-02 | sperm individualization                                    |
| GO:0007602 | 1.59E-02 | phototransduction                                          |
| GO:0008360 | 1.70E-02 | regulation of cell shape                                   |
| GO:0007179 | 1.74E-02 | transforming growth factor beta receptor signaling pathway |
| GO:0007426 | 1.74E-02 | tracheal outgrowth, open tracheal system                   |
| GO:0016477 | 1.74E-02 | cell migration                                             |
| GO:0051726 | 1.89E-02 | regulation of cell cycle                                   |
| GO:0008103 | 1.96E-02 | oocyte microtubule cytoskeleton polarization               |
| GO:0035277 | 1.96E-02 | spiracle morphogenesis, open tracheal system               |
| GO:0008286 | 1.96E-02 | insulin receptor signaling pathway                         |
| GO:0007224 | 2.01E-02 | smoothened signaling pathway                               |
| GO:0016318 | 2.01E-02 | ommatidial rotation                                        |
| GO:0030707 | 2.02E-02 | ovarian follicle cell development                          |
| GO:0007517 | 2.04E-02 | muscle organ development                                   |
| GO:0001700 | 2.04E-02 | embryonic development via the syncytial blastoderm         |
| GO:0048102 | 2.04E-02 | autophagic cell death                                      |
| GO:0007315 | 2.08E-02 | pole plasm assembly                                        |
| GO:0007613 | 2.08E-02 | memory                                                     |
| GO:0007293 | 2.08E-02 | germarium-derived egg chamber formation                    |
| GO:0030307 | 2.08E-02 | positive regulation of cell growth                         |
| GO:0042067 | 2.30E-02 | establishment of ommatidial polarity                       |

|            |          |                                                                  |
|------------|----------|------------------------------------------------------------------|
| GO:0007303 | 2.72E-02 | cytoplasmic transport, nurse cell to oocyte                      |
| GO:0019991 | 2.72E-02 | septate junction assembly                                        |
| GO:0007015 | 2.98E-02 | actin filament organization                                      |
| GO:0007528 | 3.04E-02 | neuromuscular junction development                               |
| GO:0007304 | 3.04E-02 | chorion-containing eggshell formation                            |
| GO:0035099 | 3.04E-02 | hemocyte migration                                               |
| GO:0045941 | 3.04E-02 | positive regulation of transcription                             |
| GO:0006325 | 3.04E-02 | chromatin organization                                           |
| GO:0007367 | 3.04E-02 | segment polarity determination                                   |
| GO:0007309 | 3.04E-02 | oocyte axis specification                                        |
| GO:0051056 | 3.04E-02 | regulation of small GTPase mediated signal transduction          |
| GO:0006366 | 3.28E-02 | transcription from RNA polymerase II promoter                    |
| GO:0045893 | 3.28E-02 | positive regulation of transcription, DNA-dependent              |
| GO:0009790 | 3.42E-02 | embryonic development                                            |
| GO:0007409 | 3.50E-02 | axonogenesis                                                     |
| GO:0030097 | 3.53E-02 | hemopoiesis                                                      |
| GO:0017148 | 3.53E-02 | negative regulation of translation                               |
| GO:0007286 | 3.53E-02 | spermatid development                                            |
| GO:0007254 | 3.53E-02 | JNK cascade                                                      |
| GO:0007310 | 3.53E-02 | oocyte dorsal/ventral axis specification                         |
| GO:0055059 | 3.90E-02 | asymmetric neuroblast division                                   |
| GO:0000381 | 3.99E-02 | regulation of alternative nuclear mRNA splicing, via spliceosome |
| GO:0046843 | 4.17E-02 | dorsal appendage formation                                       |
| GO:0040014 | 4.18E-02 | regulation of multicellular organism growth                      |
| GO:0006378 | 4.18E-02 | mRNA polyadenylation                                             |
| GO:0007417 | 4.31E-02 | central nervous system development                               |
| GO:0006470 | 4.32E-02 | protein amino acid dephosphorylation                             |
| GO:0007350 | 4.68E-02 | blastoderm segmentation                                          |

---

**Table S4 GO term enrichment for molecular function in the Australian cline for genes that overlap windows in the top 1% tail of *F<sub>st</sub>*.**

| GO term    | 1 % Tail Molecular Function |                                          |
|------------|-----------------------------|------------------------------------------|
|            | q-value                     | description                              |
| GO:0005515 | 1.79E-06                    | protein binding                          |
| GO:0000166 | 9.09E-03                    | nucleotide binding                       |
| GO:0003700 | 1.17E-02                    | transcription factor activity            |
| GO:0004674 | 1.17E-02                    | protein serine/threonine kinase activity |
| GO:0004672 | 1.17E-02                    | protein kinase activity                  |
| GO:0004871 | 1.26E-02                    | signal transducer activity               |
| GO:0043565 | 1.50E-02                    | sequence-specific DNA binding            |
| GO:0004930 | 1.81E-02                    | G-protein coupled receptor activity      |
| GO:0005509 | 3.32E-02                    | calcium ion binding                      |
| GO:0003779 | 3.37E-02                    | actin binding                            |
| GO:0003729 | 3.60E-02                    | mRNA binding                             |
| GO:0042623 | 3.60E-02                    | ATPase activity, coupled                 |
| GO:0005524 | 4.08E-02                    | ATP binding                              |



**Table S5 GO term enrichment for molecular function in the Australian cline for genes that overlap windows in the top 2.5% tail of Fst.**

| GO term    | 2.5 % Tail Molecular Function |                                                             |
|------------|-------------------------------|-------------------------------------------------------------|
|            | q-value                       | description                                                 |
| GO:0005515 | 5.44E-10                      | protein binding                                             |
| GO:0003700 | 3.20E-09                      | transcription factor activity                               |
| GO:0004672 | 9.65E-06                      | protein kinase activity                                     |
| GO:0004674 | 3.88E-05                      | protein serine/threonine kinase activity                    |
| GO:0043565 | 3.88E-05                      | sequence-specific DNA binding                               |
| GO:0005509 | 9.56E-05                      | calcium ion binding                                         |
| GO:0008270 | 2.82E-04                      | zinc ion binding                                            |
| GO:0004871 | 6.54E-04                      | signal transducer activity                                  |
| GO:0004702 | 6.54E-04                      | receptor signaling protein serine/threonine kinase activity |
| GO:0004725 | 1.60E-03                      | protein tyrosine phosphatase activity                       |
| GO:0005524 | 1.60E-03                      | ATP binding                                                 |
| GO:0003702 | 1.98E-03                      | RNA polymerase II transcription factor activity             |
| GO:0005089 | 2.78E-03                      | Rho guanyl-nucleotide exchange factor activity              |
| GO:0004714 | 3.11E-03                      | transmembrane receptor protein tyrosine kinase activity     |
| GO:0003676 | 4.02E-03                      | nucleic acid binding                                        |
| GO:0008188 | 4.02E-03                      | neuropeptide receptor activity                              |
| GO:0005096 | 4.02E-03                      | GTPase activator activity                                   |
| GO:0005102 | 4.13E-03                      | receptor binding                                            |
| GO:0008026 | 5.10E-03                      | ATP-dependent helicase activity                             |
| GO:0003713 | 5.26E-03                      | transcription coactivator activity                          |
| GO:0005249 | 5.58E-03                      | voltage-gated potassium channel activity                    |
| GO:0004713 | 8.82E-03                      | protein tyrosine kinase activity                            |
| GO:0004930 | 8.82E-03                      | G-protein coupled receptor activity                         |
| GO:0003704 | 8.82E-03                      | specific RNA polymerase II transcription factor activity    |
| GO:0016563 | 1.37E-02                      | transcription activator activity                            |
| GO:0004872 | 1.37E-02                      | receptor activity                                           |
| GO:0003779 | 1.37E-02                      | actin binding                                               |
| GO:0000166 | 1.39E-02                      | nucleotide binding                                          |
| GO:0016566 | 1.42E-02                      | specific transcriptional repressor activity                 |
| GO:0008236 | 1.47E-02                      | serine-type peptidase activity                              |
| GO:0004222 | 1.60E-02                      | metalloendopeptidase activity                               |
| GO:0042803 | 1.68E-02                      | protein homodimerization activity                           |
| GO:0008083 | 1.81E-02                      | growth factor activity                                      |
| GO:0019992 | 2.47E-02                      | diacylglycerol binding                                      |
| GO:0004888 | 2.47E-02                      | transmembrane receptor activity                             |
| GO:0005516 | 3.85E-02                      | calmodulin binding                                          |
| GO:0008017 | 4.56E-02                      | microtubule binding                                         |
| GO:0046983 | 4.56E-02                      | protein dimerization activity                               |
| GO:0003729 | 4.85E-02                      | mRNA binding                                                |

**Table S6 GO term enrichment for molecular function in the Australian cline for genes that overlap windows in the top 5% tail of Fst.**

| GO term    | 5 % Tail Molecular Function |                                                                     |
|------------|-----------------------------|---------------------------------------------------------------------|
|            | q-value                     | description                                                         |
| GO:0003700 | 3.39E-14                    | transcription factor activity                                       |
| GO:0005515 | 1.99E-13                    | protein binding                                                     |
| GO:0005524 | 8.48E-09                    | ATP binding                                                         |
| GO:0043565 | 3.00E-07                    | sequence-specific DNA binding                                       |
| GO:0005509 | 3.00E-07                    | calcium ion binding                                                 |
| GO:0004672 | 1.97E-06                    | protein kinase activity                                             |
| GO:0004674 | 2.91E-06                    | protein serine/threonine kinase activity                            |
| GO:0008188 | 7.43E-05                    | neuropeptide receptor activity                                      |
| GO:0008270 | 1.12E-04                    | zinc ion binding                                                    |
| GO:0003702 | 2.61E-04                    | RNA polymerase II transcription factor activity                     |
| GO:0003779 | 6.72E-04                    | actin binding                                                       |
| GO:0004871 | 9.13E-04                    | signal transducer activity                                          |
| GO:0005245 | 1.64E-03                    | voltage-gated calcium channel activity                              |
| GO:0005096 | 1.64E-03                    | GTPase activator activity                                           |
| GO:0004702 | 1.67E-03                    | receptor signaling protein serine/threonine kinase activity         |
| GO:0004725 | 2.56E-03                    | protein tyrosine phosphatase activity                               |
| GO:0004889 | 3.99E-03                    | nicotinic acetylcholine-activated cation-selective channel activity |
| GO:0032027 | 3.99E-03                    | myosin light chain binding                                          |
| GO:0003774 | 4.34E-03                    | motor activity                                                      |
| GO:0003707 | 5.47E-03                    | steroid hormone receptor activity                                   |
| GO:0005249 | 6.08E-03                    | voltage-gated potassium channel activity                            |
| GO:0004386 | 9.04E-03                    | helicase activity                                                   |
| GO:0004190 | 9.04E-03                    | aspartic-type endopeptidase activity                                |
| GO:0003777 | 9.04E-03                    | microtubule motor activity                                          |
| GO:0008026 | 9.04E-03                    | ATP-dependent helicase activity                                     |
| GO:0005102 | 1.01E-02                    | receptor binding                                                    |
| GO:0004222 | 1.01E-02                    | metalloendopeptidase activity                                       |
| GO:0003676 | 1.16E-02                    | nucleic acid binding                                                |
| GO:0004872 | 1.25E-02                    | receptor activity                                                   |
| GO:0003704 | 1.25E-02                    | specific RNA polymerase II transcription factor activity            |
| GO:0003713 | 1.47E-02                    | transcription coactivator activity                                  |
| GO:0005089 | 1.57E-02                    | Rho guanyl-nucleotide exchange factor activity                      |
| GO:0004888 | 1.57E-02                    | transmembrane receptor activity                                     |
| GO:0019992 | 1.57E-02                    | diacylglycerol binding                                              |
| GO:0000166 | 1.79E-02                    | nucleotide binding                                                  |
| GO:0008239 | 1.82E-02                    | dipeptidyl-peptidase activity                                       |
| GO:0004879 | 1.82E-02                    | ligand-dependent nuclear receptor activity                          |
| GO:0042626 | 1.82E-02                    | ATPase activity, coupled to transmembrane movement of substances    |
| GO:0003746 | 1.82E-02                    | translation elongation factor activity                              |
| GO:0016566 | 1.87E-02                    | specific transcriptional repressor activity                         |

|            |          |                                                         |
|------------|----------|---------------------------------------------------------|
| GO:0004930 | 2.17E-02 | G-protein coupled receptor activity                     |
| GO:0005085 | 2.17E-02 | guanyl-nucleotide exchange factor activity              |
| GO:0017111 | 2.55E-02 | nucleoside-triphosphatase activity                      |
| GO:0004714 | 2.55E-02 | transmembrane receptor protein tyrosine kinase activity |
| GO:0005516 | 2.55E-02 | calmodulin binding                                      |
| GO:0003677 | 2.55E-02 | DNA binding                                             |
| GO:0005215 | 2.55E-02 | transporter activity                                    |
| GO:0008017 | 2.97E-02 | microtubule binding                                     |
| GO:0042623 | 3.27E-02 | ATPase activity, coupled                                |
| GO:0016563 | 3.55E-02 | transcription activator activity                        |
| GO:0050839 | 3.62E-02 | cell adhesion molecule binding                          |
| GO:0035091 | 3.62E-02 | phosphoinositide binding                                |
| GO:0008083 | 3.86E-02 | growth factor activity                                  |
| GO:0004713 | 4.10E-02 | protein tyrosine kinase activity                        |
| GO:0003714 | 4.16E-02 | transcription corepressor activity                      |
| GO:0032183 | 4.36E-02 | SUMO binding                                            |

---

**Table S7 GO term enrichment for cellular component in the Australian cline for genes that overlap windows in the top 1% tail of Fst.**

| GO term    | 1 % Tail Cellular Component |                                    |
|------------|-----------------------------|------------------------------------|
|            | q-value                     | description                        |
| GO:0005886 | 1.97E-06                    | plasma membrane                    |
| GO:0045211 | 2.47E-04                    | postsynaptic membrane              |
| GO:0042600 | 6.03E-04                    | chorion                            |
| GO:0005887 | 6.03E-04                    | integral to plasma membrane        |
| GO:0005578 | 2.51E-03                    | proteinaceous extracellular matrix |
| GO:0043234 | 2.51E-03                    | protein complex                    |
| GO:0016020 | 2.51E-03                    | membrane                           |
| GO:0005622 | 1.45E-02                    | intracellular                      |
| GO:0005634 | 2.82E-02                    | nucleus                            |
| GO:0016021 | 3.70E-02                    | integral to membrane               |
| GO:0005875 | 3.70E-02                    | microtubule associated complex     |

**Table S8 GO term enrichment for cellular component in the Australian cline for genes that overlap windows in the top 2.5% tail of Fst.**

| 2.5 % Tail Cellular Component |          |                                         |
|-------------------------------|----------|-----------------------------------------|
| GO term                       | q-value  | description                             |
| GO:0005886                    | 2.11E-13 | plasma membrane                         |
| GO:0005634                    | 1.38E-06 | nucleus                                 |
| GO:0005887                    | 5.67E-05 | integral to plasma membrane             |
| GO:0005918                    | 1.44E-04 | septate junction                        |
| GO:0045211                    | 9.38E-04 | postsynaptic membrane                   |
| GO:0005912                    | 1.42E-03 | adherens junction                       |
| GO:0035003                    | 1.42E-03 | subapical complex                       |
| GO:0016327                    | 1.42E-03 | apicolateral plasma membrane            |
| GO:0016324                    | 1.42E-03 | apical plasma membrane                  |
| GO:0045202                    | 2.26E-03 | synapse                                 |
| GO:0016021                    | 2.37E-03 | integral to membrane                    |
| GO:0008076                    | 3.27E-03 | voltage-gated potassium channel complex |
| GO:0016459                    | 5.74E-03 | myosin complex                          |
| GO:0008021                    | 6.02E-03 | synaptic vesicle                        |
| GO:0045179                    | 8.90E-03 | apical cortex                           |
| GO:0043234                    | 8.90E-03 | protein complex                         |
| GO:0005667                    | 1.15E-02 | transcription factor complex            |
| GO:0042600                    | 1.48E-02 | chorion                                 |
| GO:0005622                    | 1.68E-02 | intracellular                           |
| GO:0016020                    | 1.76E-02 | membrane                                |
| GO:0005578                    | 1.92E-02 | proteinaceous extracellular matrix      |
| GO:0005739                    | 2.91E-02 | mitochondrion                           |
| GO:0005875                    | 3.68E-02 | microtubule associated complex          |
| GO:0005938                    | 4.85E-02 | cell cortex                             |

**Table S9 GO term enrichment for cellular component in the Australian cline for genes that overlap windows in the top 5% tail of Fst.**

| 5 % Tail Cellular Component |          |                                                        |
|-----------------------------|----------|--------------------------------------------------------|
| GO term                     | q-value  | description                                            |
| GO:0005886                  | 1.98E-14 | plasma membrane                                        |
| GO:0005634                  | 4.17E-11 | nucleus                                                |
| GO:0005887                  | 2.97E-08 | integral to plasma membrane                            |
| GO:0016021                  | 2.72E-06 | integral to membrane                                   |
| GO:0016324                  | 2.27E-04 | apical plasma membrane                                 |
| GO:0005913                  | 3.46E-04 | cell-cell adherens junction                            |
| GO:0045211                  | 6.54E-04 | postsynaptic membrane                                  |
| GO:0035003                  | 8.56E-04 | subapical complex                                      |
| GO:0005912                  | 8.62E-04 | adherens junction                                      |
| GO:0005918                  | 1.31E-03 | septate junction                                       |
| GO:0005737                  | 1.76E-03 | cytoplasm                                              |
| GO:0045179                  | 2.09E-03 | apical cortex                                          |
| GO:0005892                  | 2.41E-03 | nicotinic acetylcholine-gated receptor-channel complex |
| GO:0043195                  | 2.41E-03 | terminal button                                        |
| GO:0016459                  | 2.41E-03 | myosin complex                                         |
| GO:0005622                  | 2.41E-03 | intracellular                                          |
| GO:0045202                  | 2.41E-03 | synapse                                                |
| GO:0016323                  | 2.41E-03 | basolateral plasma membrane                            |
| GO:0008076                  | 2.41E-03 | voltage-gated potassium channel complex                |
| GO:0016327                  | 3.14E-03 | apicolateral plasma membrane                           |
| GO:0005875                  | 3.83E-03 | microtubule associated complex                         |
| GO:0016020                  | 4.18E-03 | membrane                                               |
| GO:0009986                  | 4.52E-03 | cell surface                                           |
| GO:0008021                  | 5.40E-03 | synaptic vesicle                                       |
| GO:0005578                  | 6.13E-03 | proteinaceous extracellular matrix                     |
| GO:0005604                  | 8.43E-03 | basement membrane                                      |
| GO:0005938                  | 8.74E-03 | cell cortex                                            |
| GO:0043190                  | 1.26E-02 | ATP-binding cassette (ABC) transporter complex         |
| GO:0043025                  | 1.36E-02 | cell soma                                              |
| GO:0005705                  | 1.36E-02 | polytene chromosome interband                          |
| GO:0030425                  | 3.37E-02 | dendrite                                               |
| GO:0015629                  | 3.37E-02 | actin cytoskeleton                                     |
| GO:0005667                  | 3.98E-02 | transcription factor complex                           |

**Table S10 GO term enrichment for biological process in the North American cline for genes that overlap windows in the top 1% tail of Fst.**

| 1 % Tail Biological Process |          |                                                      |
|-----------------------------|----------|------------------------------------------------------|
| GO term                     | q-value  | description                                          |
| GO:0007411                  | 8.92E-06 | axon guidance                                        |
| GO:0006355                  | 8.92E-06 | regulation of transcription, DNA-dependent           |
| GO:0007455                  | 1.28E-04 | eye-antennal disc morphogenesis                      |
| GO:0048749                  | 1.30E-04 | compound eye development                             |
| GO:0007165                  | 1.54E-04 | signal transduction                                  |
| GO:0007155                  | 2.44E-04 | cell adhesion                                        |
| GO:0007476                  | 2.44E-04 | imaginal disc-derived wing morphogenesis             |
| GO:0007424                  | 2.78E-04 | open tracheal system development                     |
| GO:0007611                  | 3.13E-04 | learning or memory                                   |
| GO:0030707                  | 4.18E-04 | ovarian follicle cell development                    |
| GO:0035317                  | 4.18E-04 | imaginal disc-derived wing hair organization         |
| GO:0007530                  | 4.18E-04 | sex determination                                    |
| GO:0007156                  | 4.60E-04 | homophilic cell adhesion                             |
| GO:0007422                  | 5.26E-04 | peripheral nervous system development                |
| GO:0007350                  | 7.08E-04 | blastoderm segmentation                              |
| GO:0006811                  | 1.16E-03 | ion transport                                        |
| GO:0006468                  | 1.25E-03 | protein amino acid phosphorylation                   |
| GO:0008355                  | 1.77E-03 | olfactory learning                                   |
| GO:0006350                  | 1.80E-03 | transcription                                        |
| GO:0016310                  | 1.80E-03 | phosphorylation                                      |
| GO:0008104                  | 1.82E-03 | protein localization                                 |
| GO:0006813                  | 2.37E-03 | potassium ion transport                              |
| GO:0007391                  | 2.37E-03 | dorsal closure                                       |
| GO:0008407                  | 2.75E-03 | bristle morphogenesis                                |
| GO:0007623                  | 2.85E-03 | circadian rhythm                                     |
| GO:0007420                  | 2.85E-03 | brain development                                    |
| GO:0007186                  | 3.70E-03 | G-protein coupled receptor protein signaling pathway |
| GO:0007399                  | 3.70E-03 | nervous system development                           |
| GO:0045449                  | 4.03E-03 | regulation of transcription                          |
| GO:0048477                  | 4.67E-03 | oogenesis                                            |
| GO:0048813                  | 6.08E-03 | dendrite morphogenesis                               |
| GO:0007242                  | 8.01E-03 | intracellular signaling cascade                      |
| GO:0008360                  | 8.37E-03 | regulation of cell shape                             |
| GO:0002121                  | 8.37E-03 | inter-male aggressive behavior                       |
| GO:0007417                  | 9.30E-03 | central nervous system development                   |
| GO:0007507                  | 1.13E-02 | heart development                                    |
| GO:0007017                  | 1.75E-02 | microtubule-based process                            |
| GO:0006470                  | 2.98E-02 | protein amino acid dephosphorylation                 |

**Table S11 GO term enrichment for biological process in the North American cline for genes that overlap windows in the top 2.5% tail of Fst.**

| 2.5 % Tail Biological Process |          |                                                      |
|-------------------------------|----------|------------------------------------------------------|
| GO term                       | q-value  | description                                          |
| GO:0007476                    | 1.63E-07 | imaginal disc-derived wing morphogenesis             |
| GO:0048749                    | 1.63E-07 | compound eye development                             |
| GO:0006355                    | 1.63E-07 | regulation of transcription, DNA-dependent           |
| GO:0007411                    | 3.96E-07 | axon guidance                                        |
| GO:0007350                    | 1.62E-06 | blastoderm segmentation                              |
| GO:0007155                    | 4.43E-06 | cell adhesion                                        |
| GO:0007513                    | 5.83E-06 | pericardial cell differentiation                     |
| GO:0045449                    | 8.22E-06 | regulation of transcription                          |
| GO:0016203                    | 1.10E-05 | muscle attachment                                    |
| GO:0007435                    | 1.10E-05 | salivary gland morphogenesis                         |
| GO:0007424                    | 1.55E-05 | open tracheal system development                     |
| GO:0006468                    | 2.18E-05 | protein amino acid phosphorylation                   |
| GO:0007156                    | 2.62E-05 | homophilic cell adhesion                             |
| GO:0007611                    | 3.07E-05 | learning or memory                                   |
| GO:0035023                    | 3.11E-05 | regulation of Rho protein signal transduction        |
| GO:0048477                    | 8.61E-05 | oogenesis                                            |
| GO:0008355                    | 8.63E-05 | olfactory learning                                   |
| GO:0007472                    | 9.07E-05 | wing disc morphogenesis                              |
| GO:0007399                    | 9.14E-05 | nervous system development                           |
| GO:0007242                    | 1.17E-04 | intracellular signaling cascade                      |
| GO:0007614                    | 1.17E-04 | short-term memory                                    |
| GO:0007619                    | 1.86E-04 | courtship behavior                                   |
| GO:0007165                    | 2.23E-04 | signal transduction                                  |
| GO:0030097                    | 2.46E-04 | hemopoiesis                                          |
| GO:0007268                    | 2.87E-04 | synaptic transmission                                |
| GO:0048800                    | 3.69E-04 | antennal morphogenesis                               |
| GO:0016318                    | 4.06E-04 | ommatidial rotation                                  |
| GO:0008360                    | 4.06E-04 | regulation of cell shape                             |
| GO:0007417                    | 4.06E-04 | central nervous system development                   |
| GO:0016055                    | 4.70E-04 | Wnt receptor signaling pathway                       |
| GO:0007507                    | 4.82E-04 | heart development                                    |
| GO:0035277                    | 4.82E-04 | spiracle morphogenesis, open tracheal system         |
| GO:0007474                    | 5.54E-04 | imaginal disc-derived wing vein specification        |
| GO:0007186                    | 5.87E-04 | G-protein coupled receptor protein signaling pathway |
| GO:0007617                    | 6.47E-04 | mating behavior                                      |
| GO:0035172                    | 6.47E-04 | hemocyte proliferation                               |
| GO:0035225                    | 6.47E-04 | determination of genital disc primordium             |
| GO:0007455                    | 7.31E-04 | eye-antennal disc morphogenesis                      |
| GO:0008407                    | 7.66E-04 | bristle morphogenesis                                |
| GO:0007428                    | 1.01E-03 | primary branching, open tracheal system              |



|            |          |                                                                      |
|------------|----------|----------------------------------------------------------------------|
| GO:0007420 | 1.03E-03 | brain development                                                    |
| GO:0006811 | 1.05E-03 | ion transport                                                        |
| GO:0008104 | 1.05E-03 | protein localization                                                 |
| GO:0008356 | 1.07E-03 | asymmetric cell division                                             |
| GO:0007391 | 1.12E-03 | dorsal closure                                                       |
| GO:0045433 | 1.15E-03 | male courtship behavior, veined wing generated song production       |
| GO:0007632 | 1.15E-03 | visual behavior                                                      |
| GO:0001745 | 1.22E-03 | compound eye morphogenesis                                           |
| GO:0008586 | 1.25E-03 | imaginal disc-derived wing vein morphogenesis                        |
| GO:0007400 | 1.43E-03 | neuroblast fate determination                                        |
| GO:0040014 | 1.43E-03 | regulation of multicellular organism growth                          |
| GO:0016477 | 1.47E-03 | cell migration                                                       |
| GO:0007422 | 1.57E-03 | peripheral nervous system development                                |
| GO:0006813 | 1.80E-03 | potassium ion transport                                              |
| GO:0030707 | 1.83E-03 | ovarian follicle cell development                                    |
| GO:0045475 | 1.85E-03 | locomotor rhythm                                                     |
| GO:0040018 | 1.85E-03 | positive regulation of multicellular organism growth                 |
| GO:0048675 | 1.85E-03 | axon extension                                                       |
| GO:0007173 | 1.99E-03 | epidermal growth factor receptor signaling pathway                   |
| GO:0045165 | 1.99E-03 | cell fate commitment                                                 |
| GO:0008286 | 1.99E-03 | insulin receptor signaling pathway                                   |
| GO:0030162 | 1.99E-03 | regulation of proteolysis                                            |
| GO:0007498 | 2.01E-03 | mesoderm development                                                 |
| GO:0007017 | 2.07E-03 | microtubule-based process                                            |
| GO:0008105 | 2.68E-03 | asymmetric protein localization                                      |
| GO:0007442 | 2.68E-03 | hindgut morphogenesis                                                |
| GO:0007475 | 2.68E-03 | apposition of dorsal and ventral imaginal disc-derived wing surfaces |
| GO:0006916 | 2.68E-03 | anti-apoptosis                                                       |
| GO:0007443 | 2.68E-03 | Malpighian tubule morphogenesis                                      |
| GO:0030307 | 2.68E-03 | positive regulation of cell growth                                   |
| GO:0035317 | 2.68E-03 | imaginal disc-derived wing hair organization                         |
| GO:0048149 | 2.68E-03 | behavioral response to ethanol                                       |
| GO:0006816 | 2.68E-03 | calcium ion transport                                                |
| GO:0008345 | 2.68E-03 | larval locomotory behavior                                           |
| GO:0007623 | 2.82E-03 | circadian rhythm                                                     |
| GO:0001737 | 3.83E-03 | establishment of imaginal disc-derived wing hair orientation         |
| GO:0002168 | 3.83E-03 | instar larval development                                            |
| GO:0016199 | 3.83E-03 | axon midline choice point recognition                                |
| GO:0030713 | 3.83E-03 | ovarian follicle cell stalk formation                                |
| GO:0007369 | 3.83E-03 | gastrulation                                                         |
| GO:0008049 | 3.83E-03 | male courtship behavior                                              |
| GO:0007431 | 3.83E-03 | salivary gland development                                           |
| GO:0042051 | 3.83E-03 | compound eye photoreceptor development                               |
| GO:0007629 | 3.83E-03 | flight behavior                                                      |

|            |          |                                                                      |
|------------|----------|----------------------------------------------------------------------|
| GO:0007528 | 3.83E-03 | neuromuscular junction development                                   |
| GO:0008045 | 4.17E-03 | motor axon guidance                                                  |
| GO:0007419 | 4.17E-03 | ventral cord development                                             |
| GO:0007427 | 4.17E-03 | epithelial cell migration, open tracheal system                      |
| GO:0007269 | 5.13E-03 | neurotransmitter secretion                                           |
| GO:0007446 | 5.54E-03 | imaginal disc growth                                                 |
| GO:0051017 | 5.54E-03 | actin filament bundle formation                                      |
| GO:0007416 | 5.54E-03 | synapse assembly                                                     |
| GO:0001736 | 5.54E-03 | establishment of planar polarity                                     |
| GO:0007298 | 6.19E-03 | border follicle cell migration                                       |
| GO:0007140 | 6.53E-03 | male meiosis                                                         |
| GO:0042067 | 6.53E-03 | establishment of ommatidial polarity                                 |
| GO:0030178 | 6.53E-03 | negative regulation of Wnt receptor signaling pathway                |
| GO:0007398 | 6.53E-03 | ectoderm development                                                 |
| GO:0045893 | 6.86E-03 | positive regulation of transcription, DNA-dependent                  |
| GO:0007349 | 6.86E-03 | cellularization                                                      |
| GO:0001709 | 7.60E-03 | cell fate determination                                              |
| GO:0008344 | 7.60E-03 | adult locomotory behavior                                            |
| GO:0048190 | 7.89E-03 | wing disc dorsal/ventral pattern formation                           |
| GO:0007494 | 8.46E-03 | midgut development                                                   |
| GO:0007520 | 8.46E-03 | myoblast fusion                                                      |
| GO:0001700 | 8.54E-03 | embryonic development via the syncytial blastoderm                   |
| GO:0007530 | 9.93E-03 | sex determination                                                    |
| GO:0001708 | 9.93E-03 | cell fate specification                                              |
| GO:0002121 | 9.93E-03 | inter-male aggressive behavior                                       |
| GO:0007390 | 9.93E-03 | germ-band shortening                                                 |
| GO:0051276 | 9.93E-03 | chromosome organization                                              |
| GO:0000226 | 9.93E-03 | microtubule cytoskeleton organization                                |
| GO:0019991 | 9.93E-03 | septate junction assembly                                            |
| GO:0055059 | 1.06E-02 | asymmetric neuroblast division                                       |
| GO:0007015 | 1.16E-02 | actin filament organization                                          |
| GO:0007517 | 1.19E-02 | muscle organ development                                             |
| GO:0007602 | 1.19E-02 | phototransduction                                                    |
| GO:0045944 | 1.28E-02 | positive regulation of transcription from RNA polymerase II promoter |
| GO:0007224 | 1.31E-02 | smoothened signaling pathway                                         |
| GO:0007317 | 1.31E-02 | regulation of pole plasm oskar mRNA localization                     |
| GO:0016310 | 1.31E-02 | phosphorylation                                                      |
| GO:0007274 | 1.31E-02 | neuromuscular synaptic transmission                                  |
| GO:0007163 | 1.68E-02 | establishment or maintenance of cell polarity                        |
| GO:0007480 | 1.72E-02 | imaginal disc-derived leg morphogenesis                              |
| GO:0006915 | 2.03E-02 | apoptosis                                                            |
| GO:0030036 | 2.03E-02 | actin cytoskeleton organization                                      |
| GO:0006357 | 2.05E-02 | regulation of transcription from RNA polymerase II promoter          |
| GO:0030718 | 2.05E-02 | germ-line stem cell maintenance                                      |

|            |          |                                                  |
|------------|----------|--------------------------------------------------|
| GO:0008595 | 2.05E-02 | determination of anterior/posterior axis, embryo |
| GO:0001751 | 2.13E-02 | compound eye photoreceptor cell differentiation  |
| GO:0007346 | 2.13E-02 | regulation of mitotic cell cycle                 |
| GO:0040007 | 2.13E-02 | growth                                           |
| GO:0006350 | 2.20E-02 | transcription                                    |
| GO:0006470 | 2.33E-02 | protein amino acid dephosphorylation             |
| GO:0007444 | 2.44E-02 | imaginal disc development                        |
| GO:0008340 | 2.44E-02 | determination of adult lifespan                  |
| GO:0002009 | 2.66E-02 | morphogenesis of an epithelium                   |
| GO:0048813 | 3.11E-02 | dendrite morphogenesis                           |
| GO:0006911 | 3.11E-02 | phagocytosis, engulfment                         |
| GO:0006836 | 3.30E-02 | neurotransmitter transport                       |
| GO:0008298 | 4.08E-02 | intracellular mRNA localization                  |
| GO:0016321 | 4.24E-02 | female meiosis chromosome segregation            |
| GO:0016567 | 4.99E-02 | protein ubiquitination                           |
| GO:0046843 | 4.99E-02 | dorsal appendage formation                       |

---

**Table S12 GO term enrichment for biological process in the North American cline for genes that overlap windows in the top 5% tail of Fst.**

| 5 % Tail Biological Process |          |                                                   |
|-----------------------------|----------|---------------------------------------------------|
| GO term                     | q-value  | description                                       |
| GO:0006355                  | 1.48E-08 | regulation of transcription, DNA-dependent        |
| GO:0007411                  | 2.10E-08 | axon guidance                                     |
| GO:0007476                  | 1.13E-07 | imaginal disc-derived wing morphogenesis          |
| GO:0048477                  | 1.13E-07 | oogenesis                                         |
| GO:0035023                  | 4.71E-07 | regulation of Rho protein signal transduction     |
| GO:0048749                  | 9.49E-07 | compound eye development                          |
| GO:0007350                  | 5.78E-06 | blastoderm segmentation                           |
| GO:0007399                  | 5.78E-06 | nervous system development                        |
| GO:0007513                  | 1.22E-05 | pericardial cell differentiation                  |
| GO:0045449                  | 1.99E-05 | regulation of transcription                       |
| GO:0007156                  | 4.21E-05 | homophilic cell adhesion                          |
| GO:0006468                  | 4.21E-05 | protein amino acid phosphorylation                |
| GO:0007474                  | 4.21E-05 | imaginal disc-derived wing vein specification     |
| GO:0007482                  | 4.21E-05 | halter development                                |
| GO:0007455                  | 4.38E-05 | eye-antennal disc morphogenesis                   |
| GO:0007435                  | 4.75E-05 | salivary gland morphogenesis                      |
| GO:0008586                  | 4.75E-05 | imaginal disc-derived wing vein morphogenesis     |
| GO:0007472                  | 5.30E-05 | wing disc morphogenesis                           |
| GO:0007155                  | 5.88E-05 | cell adhesion                                     |
| GO:0007398                  | 6.34E-05 | ectoderm development                              |
| GO:0042051                  | 8.75E-05 | compound eye photoreceptor development            |
| GO:0007419                  | 8.76E-05 | ventral cord development                          |
| GO:0007391                  | 9.25E-05 | dorsal closure                                    |
| GO:0001745                  | 9.25E-05 | compound eye morphogenesis                        |
| GO:0007424                  | 9.42E-05 | open tracheal system development                  |
| GO:0010002                  | 1.14E-04 | cardioblast differentiation                       |
| GO:0048800                  | 1.46E-04 | antennal morphogenesis                            |
| GO:0035225                  | 1.46E-04 | determination of genital disc primordium          |
| GO:0016203                  | 1.46E-04 | muscle attachment                                 |
| GO:0007480                  | 1.46E-04 | imaginal disc-derived leg morphogenesis           |
| GO:0035172                  | 1.46E-04 | hemocyte proliferation                            |
| GO:0006813                  | 1.85E-04 | potassium ion transport                           |
| GO:0007417                  | 1.96E-04 | central nervous system development                |
| GO:0051276                  | 2.00E-04 | chromosome organization                           |
| GO:0007507                  | 2.44E-04 | heart development                                 |
| GO:0007400                  | 2.66E-04 | neuroblast fate determination                     |
| GO:0007416                  | 2.66E-04 | synapse assembly                                  |
| GO:0046331                  | 3.30E-04 | lateral inhibition                                |
| GO:0035286                  | 3.30E-04 | leg segmentation                                  |
| GO:0035224                  | 3.30E-04 | genital disc anterior/posterior pattern formation |

|            |          |                                                            |
|------------|----------|------------------------------------------------------------|
| GO:0008356 | 3.30E-04 | asymmetric cell division                                   |
| GO:0046667 | 3.30E-04 | compound eye retinal cell programmed cell death            |
| GO:0008406 | 3.30E-04 | gonad development                                          |
| GO:0007425 | 3.30E-04 | epithelial cell fate determination, open tracheal system   |
| GO:0035309 | 3.30E-04 | wing and notum subfield formation                          |
| GO:0007628 | 3.30E-04 | adult walking behavior                                     |
| GO:0007473 | 3.30E-04 | wing disc proximal/distal pattern formation                |
| GO:0030097 | 3.30E-04 | hemopoiesis                                                |
| GO:0007440 | 3.53E-04 | foregut morphogenesis                                      |
| GO:0035215 | 3.53E-04 | genital disc development                                   |
| GO:0007422 | 3.73E-04 | peripheral nervous system development                      |
| GO:0035088 | 3.79E-04 | establishment or maintenance of apical/basal cell polarity |
| GO:0007165 | 5.86E-04 | signal transduction                                        |
| GO:0016477 | 6.23E-04 | cell migration                                             |
| GO:0007498 | 6.67E-04 | mesoderm development                                       |
| GO:0008104 | 6.73E-04 | protein localization                                       |
| GO:0008407 | 7.59E-04 | bristle morphogenesis                                      |
| GO:0045893 | 7.59E-04 | positive regulation of transcription, DNA-dependent        |
| GO:0007479 | 8.97E-04 | leg disc proximal/distal pattern formation                 |
| GO:0007442 | 8.97E-04 | hindgut morphogenesis                                      |
| GO:0007298 | 9.07E-04 | border follicle cell migration                             |
| GO:0016055 | 9.07E-04 | Wnt receptor signaling pathway                             |
| GO:0030162 | 1.05E-03 | regulation of proteolysis                                  |
| GO:0048100 | 1.08E-03 | wing disc anterior/posterior pattern formation             |
| GO:0042048 | 1.08E-03 | olfactory behavior                                         |
| GO:0008284 | 1.08E-03 | positive regulation of cell proliferation                  |
| GO:0048813 | 1.08E-03 | dendrite morphogenesis                                     |
| GO:0007268 | 1.08E-03 | synaptic transmission                                      |
| GO:0007420 | 1.08E-03 | brain development                                          |
| GO:0008045 | 1.08E-03 | motor axon guidance                                        |
| GO:0007076 | 1.20E-03 | mitotic chromosome condensation                            |
| GO:0007415 | 1.23E-03 | defasciculation of motor neuron axon                       |
| GO:0007614 | 1.23E-03 | short-term memory                                          |
| GO:0008355 | 1.24E-03 | olfactory learning                                         |
| GO:0048190 | 1.36E-03 | wing disc dorsal/ventral pattern formation                 |
| GO:0007186 | 1.39E-03 | G-protein coupled receptor protein signaling pathway       |
| GO:0008049 | 1.39E-03 | male courtship behavior                                    |
| GO:0007431 | 1.39E-03 | salivary gland development                                 |
| GO:0007494 | 1.49E-03 | midgut development                                         |
| GO:0046843 | 1.49E-03 | dorsal appendage formation                                 |
| GO:0007619 | 1.49E-03 | courtship behavior                                         |
| GO:0050770 | 1.61E-03 | regulation of axonogenesis                                 |
| GO:0030307 | 1.61E-03 | positive regulation of cell growth                         |
| GO:0008360 | 1.86E-03 | regulation of cell shape                                   |

|            |          |                                                                                    |
|------------|----------|------------------------------------------------------------------------------------|
| GO:0001709 | 2.03E-03 | cell fate determination                                                            |
| GO:0035277 | 2.03E-03 | spiracle morphogenesis, open tracheal system                                       |
| GO:0045165 | 2.03E-03 | cell fate commitment                                                               |
| GO:0042052 | 2.13E-03 | rhabdomere development                                                             |
| GO:0048854 | 2.13E-03 | brain morphogenesis                                                                |
| GO:0001964 | 2.13E-03 | startle response                                                                   |
| GO:0045494 | 2.13E-03 | photoreceptor cell maintenance                                                     |
| GO:0045433 | 2.13E-03 | male courtship behavior, veined wing generated song production                     |
| GO:0009952 | 2.13E-03 | anterior/posterior pattern formation                                               |
| GO:0010552 | 2.13E-03 | positive regulation of gene-specific transcription from RNA polymerase II promoter |
| GO:0045167 | 2.13E-03 | asymmetric protein localization involved in cell fate determination                |
| GO:0031987 | 2.13E-03 | locomotion involved in locomotory behavior                                         |
| GO:0008354 | 2.14E-03 | germ cell migration                                                                |
| GO:0055059 | 2.14E-03 | asymmetric neuroblast division                                                     |
| GO:0030707 | 2.20E-03 | ovarian follicle cell development                                                  |
| GO:0030713 | 2.86E-03 | ovarian follicle cell stalk formation                                              |
| GO:0016199 | 2.86E-03 | axon midline choice point recognition                                              |
| GO:0040001 | 2.88E-03 | establishment of mitotic spindle localization                                      |
| GO:0007051 | 2.88E-03 | spindle organization                                                               |
| GO:0016331 | 2.88E-03 | morphogenesis of embryonic epithelium                                              |
| GO:0007242 | 2.97E-03 | intracellular signaling cascade                                                    |
| GO:0006816 | 3.07E-03 | calcium ion transport                                                              |
| GO:0048149 | 3.07E-03 | behavioral response to ethanol                                                     |
| GO:0006916 | 3.07E-03 | anti-apoptosis                                                                     |
| GO:0007443 | 3.07E-03 | Malpighian tubule morphogenesis                                                    |
| GO:0007140 | 3.17E-03 | male meiosis                                                                       |
| GO:0007346 | 3.17E-03 | regulation of mitotic cell cycle                                                   |
| GO:0007611 | 3.17E-03 | learning or memory                                                                 |
| GO:0007517 | 3.22E-03 | muscle organ development                                                           |
| GO:0002121 | 3.26E-03 | inter-male aggressive behavior                                                     |
| GO:0040018 | 3.94E-03 | positive regulation of multicellular organism growth                               |
| GO:0030261 | 3.94E-03 | chromosome condensation                                                            |
| GO:0046620 | 3.94E-03 | regulation of organ growth                                                         |
| GO:0048675 | 3.94E-03 | axon extension                                                                     |
| GO:0007297 | 3.94E-03 | ovarian follicle cell migration                                                    |
| GO:0008587 | 4.51E-03 | imaginal disc-derived wing margin morphogenesis                                    |
| GO:0035220 | 4.51E-03 | wing disc development                                                              |
| GO:0040014 | 4.51E-03 | regulation of multicellular organism growth                                        |
| GO:0048542 | 4.51E-03 | lymph gland development                                                            |
| GO:0007446 | 4.51E-03 | imaginal disc growth                                                               |
| GO:0002009 | 4.65E-03 | morphogenesis of an epithelium                                                     |
| GO:0006811 | 5.37E-03 | ion transport                                                                      |
| GO:0006979 | 5.47E-03 | response to oxidative stress                                                       |

|            |          |                                                                       |
|------------|----------|-----------------------------------------------------------------------|
| GO:0008361 | 5.61E-03 | regulation of cell size                                               |
| GO:0045570 | 5.61E-03 | regulation of imaginal disc growth                                    |
| GO:0045466 | 5.61E-03 | R7 cell differentiation                                               |
| GO:0007447 | 5.61E-03 | imaginal disc pattern formation                                       |
| GO:0046329 | 5.61E-03 | negative regulation of JNK cascade                                    |
| GO:0007301 | 5.61E-03 | ovarian ring canal formation                                          |
| GO:0007617 | 5.61E-03 | mating behavior                                                       |
| GO:0001700 | 5.93E-03 | embryonic development via the syncytial blastoderm                    |
| GO:0008105 | 6.60E-03 | asymmetric protein localization                                       |
| GO:0007304 | 6.60E-03 | chorion-containing eggshell formation                                 |
| GO:0045197 | 6.60E-03 | establishment or maintenance of epithelial cell apical/basal polarity |
| GO:0008345 | 6.60E-03 | larval locomotory behavior                                            |
| GO:0006836 | 6.60E-03 | neurotransmitter transport                                            |
| GO:0007379 | 6.60E-03 | segment specification                                                 |
| GO:0009880 | 6.60E-03 | embryonic pattern specification                                       |
| GO:0007017 | 6.61E-03 | microtubule-based process                                             |
| GO:0007280 | 6.88E-03 | pole cell migration                                                   |
| GO:0007548 | 6.88E-03 | sex differentiation                                                   |
| GO:0007173 | 7.43E-03 | epidermal growth factor receptor signaling pathway                    |
| GO:0030036 | 7.58E-03 | actin cytoskeleton organization                                       |
| GO:0007444 | 8.37E-03 | imaginal disc development                                             |
| GO:0016318 | 9.32E-03 | ommatidial rotation                                                   |
| GO:0007427 | 9.32E-03 | epithelial cell migration, open tracheal system                       |
| GO:0007157 | 1.00E-02 | heterophilic cell adhesion                                            |
| GO:0001751 | 1.00E-02 | compound eye photoreceptor cell differentiation                       |
| GO:0007349 | 1.00E-02 | cellularization                                                       |
| GO:0045610 | 1.00E-02 | regulation of hemocyte differentiation                                |
| GO:0007632 | 1.00E-02 | visual behavior                                                       |
| GO:0022416 | 1.00E-02 | bristle development                                                   |
| GO:0030178 | 1.00E-02 | negative regulation of Wnt receptor signaling pathway                 |
| GO:0016458 | 1.00E-02 | gene silencing                                                        |
| GO:0016360 | 1.00E-02 | sensory organ precursor cell fate determination                       |
| GO:0007552 | 1.00E-02 | metamorphosis                                                         |
| GO:0007528 | 1.00E-02 | neuromuscular junction development                                    |
| GO:0007428 | 1.00E-02 | primary branching, open tracheal system                               |
| GO:0019991 | 1.00E-02 | septate junction assembly                                             |
| GO:0007390 | 1.00E-02 | germ-band shortening                                                  |
| GO:0007369 | 1.00E-02 | gastrulation                                                          |
| GO:0007307 | 1.00E-02 | eggshell chorion gene amplification                                   |
| GO:0001708 | 1.00E-02 | cell fate specification                                               |
| GO:0000226 | 1.00E-02 | microtubule cytoskeleton organization                                 |
| GO:0035050 | 1.00E-02 | embryonic heart tube development                                      |
| GO:0055085 | 1.07E-02 | transmembrane transport                                               |
| GO:0007423 | 1.12E-02 | sensory organ development                                             |

|            |          |                                                                           |
|------------|----------|---------------------------------------------------------------------------|
| GO:0007163 | 1.19E-02 | establishment or maintenance of cell polarity                             |
| GO:0006357 | 1.26E-02 | regulation of transcription from RNA polymerase II promoter               |
| GO:0006325 | 1.34E-02 | chromatin organization                                                    |
| GO:0045944 | 1.41E-02 | positive regulation of transcription from RNA polymerase II promoter      |
| GO:0048666 | 1.41E-02 | neuron development                                                        |
| GO:0002168 | 1.46E-02 | instar larval development                                                 |
| GO:0016319 | 1.46E-02 | mushroom body development                                                 |
| GO:0006955 | 1.46E-02 | immune response                                                           |
| GO:0018991 | 1.54E-02 | oviposition                                                               |
| GO:0007067 | 1.54E-02 | mitosis                                                                   |
| GO:0030718 | 1.54E-02 | germ-line stem cell maintenance                                           |
| GO:0008595 | 1.54E-02 | determination of anterior/posterior axis, embryo                          |
| GO:0051533 | 1.54E-02 | positive regulation of NFAT protein import into nucleus                   |
| GO:0007259 | 1.54E-02 | JAK-STAT cascade                                                          |
| GO:0030536 | 1.54E-02 | larval feeding behavior                                                   |
| GO:0007519 | 1.54E-02 | skeletal muscle tissue development                                        |
| GO:0007501 | 1.54E-02 | mesodermal cell fate specification                                        |
| GO:0042059 | 1.54E-02 | negative regulation of epidermal growth factor receptor signaling pathway |
| GO:0060857 | 1.54E-02 | establishment of glial blood-brain barrier                                |
| GO:0006915 | 1.64E-02 | apoptosis                                                                 |
| GO:0007269 | 1.64E-02 | neurotransmitter secretion                                                |
| GO:0007015 | 1.83E-02 | actin filament organization                                               |
| GO:0007623 | 2.08E-02 | circadian rhythm                                                          |
| GO:0007409 | 2.08E-02 | axonogenesis                                                              |
| GO:0035147 | 2.20E-02 | branch fusion, open tracheal system                                       |
| GO:0008344 | 2.20E-02 | adult locomotory behavior                                                 |
| GO:0006914 | 2.20E-02 | autophagy                                                                 |
| GO:0008286 | 2.20E-02 | insulin receptor signaling pathway                                        |
| GO:0008103 | 2.20E-02 | oocyte microtubule cytoskeleton polarization                              |
| GO:0008347 | 2.20E-02 | glial cell migration                                                      |
| GO:0016567 | 2.23E-02 | protein ubiquitination                                                    |
| GO:0051726 | 2.23E-02 | regulation of cell cycle                                                  |
| GO:0009987 | 2.24E-02 | cellular process                                                          |
| GO:0007475 | 2.29E-02 | apposition of dorsal and ventral imaginal disc-derived wing surfaces      |
| GO:0007062 | 2.29E-02 | sister chromatid cohesion                                                 |
| GO:0007525 | 2.29E-02 | somatic muscle development                                                |
| GO:0001738 | 2.29E-02 | morphogenesis of a polarized epithelium                                   |
| GO:0007613 | 2.29E-02 | memory                                                                    |
| GO:0045746 | 2.29E-02 | negative regulation of Notch signaling pathway                            |
| GO:0009312 | 2.29E-02 | oligosaccharide biosynthetic process                                      |
| GO:0008293 | 2.29E-02 | torso signaling pathway                                                   |
| GO:0007088 | 2.61E-02 | regulation of mitosis                                                     |
| GO:0040007 | 2.61E-02 | growth                                                                    |
| GO:0042067 | 2.61E-02 | establishment of ommatidial polarity                                      |



|            |          |                                                                  |
|------------|----------|------------------------------------------------------------------|
| GO:0042127 | 2.61E-02 | regulation of cell proliferation                                 |
| GO:0035317 | 2.96E-02 | imaginal disc-derived wing hair organization                     |
| GO:0007530 | 2.96E-02 | sex determination                                                |
| GO:0006917 | 2.96E-02 | induction of apoptosis                                           |
| GO:0045475 | 2.96E-02 | locomotor rhythm                                                 |
| GO:0001736 | 2.96E-02 | establishment of planar polarity                                 |
| GO:0016311 | 2.96E-02 | dephosphorylation                                                |
| GO:0035071 | 3.01E-02 | salivary gland cell autophagic cell death                        |
| GO:0007169 | 3.32E-02 | transmembrane receptor protein tyrosine kinase signaling pathway |
| GO:0007629 | 3.32E-02 | flight behavior                                                  |
| GO:0001737 | 3.32E-02 | establishment of imaginal disc-derived wing hair orientation     |
| GO:0007362 | 3.32E-02 | terminal region determination                                    |
| GO:0051056 | 3.32E-02 | regulation of small GTPase mediated signal transduction          |
| GO:0006897 | 3.80E-02 | endocytosis                                                      |
| GO:0006396 | 4.00E-02 | RNA processing                                                   |
| GO:0016321 | 4.00E-02 | female meiosis chromosome segregation                            |
| GO:0007274 | 4.00E-02 | neuromuscular synaptic transmission                              |
| GO:0007310 | 4.00E-02 | oocyte dorsal/ventral axis specification                         |
| GO:0017148 | 4.00E-02 | negative regulation of translation                               |
| GO:0051017 | 4.73E-02 | actin filament bundle formation                                  |
| GO:0006865 | 4.80E-02 | amino acid transport                                             |
| GO:0016481 | 4.97E-02 | negative regulation of transcription                             |

---

**Table S13 GO term enrichment for molecular function in the North American cline for genes that overlap windows in the top 1% tail of Fst.**

| 1 % Tail Molecular Function |          |                                                          |
|-----------------------------|----------|----------------------------------------------------------|
| GO term                     | q-value  | description                                              |
| GO:0003700                  | 3.80E-07 | transcription factor activity                            |
| GO:0043565                  | 2.48E-05 | sequence-specific DNA binding                            |
| GO:0003704                  | 5.27E-05 | specific RNA polymerase II transcription factor activity |
| GO:0004672                  | 2.96E-04 | protein kinase activity                                  |
| GO:0005515                  | 5.34E-04 | protein binding                                          |
| GO:0000166                  | 5.34E-04 | nucleotide binding                                       |
| GO:0019992                  | 2.01E-03 | diacylglycerol binding                                   |
| GO:0016563                  | 3.32E-03 | transcription activator activity                         |
| GO:0004674                  | 7.09E-03 | protein serine/threonine kinase activity                 |
| GO:0003702                  | 7.18E-03 | RNA polymerase II transcription factor activity          |
| GO:0004725                  | 7.68E-03 | protein tyrosine phosphatase activity                    |
| GO:0008188                  | 7.68E-03 | neuropeptide receptor activity                           |
| GO:0008270                  | 1.08E-02 | zinc ion binding                                         |
| GO:0005509                  | 1.64E-02 | calcium ion binding                                      |
| GO:0042803                  | 1.89E-02 | protein homodimerization activity                        |
| GO:0003729                  | 1.89E-02 | mRNA binding                                             |
| GO:0004713                  | 2.04E-02 | protein tyrosine kinase activity                         |
| GO:0003677                  | 2.07E-02 | DNA binding                                              |
| GO:0003779                  | 2.20E-02 | actin binding                                            |
| GO:0003774                  | 2.55E-02 | motor activity                                           |
| GO:0008017                  | 3.42E-02 | microtubule binding                                      |
| GO:0020037                  | 3.96E-02 | heme binding                                             |
| GO:0003723                  | 4.02E-02 | RNA binding                                              |
| GO:0042623                  | 4.75E-02 | ATPase activity, coupled                                 |
| GO:0004930                  | 4.94E-02 | G-protein coupled receptor activity                      |

**Table S14 GO term enrichment for molecular function in the North American cline for genes that overlap windows in the top 2.5% tail of Fst.**

| 2.5% Tail Molecular Function |          |                                                          |
|------------------------------|----------|----------------------------------------------------------|
| GO term                      | q-value  | description                                              |
| GO:0003700                   | 4.16E-10 | transcription factor activity                            |
| GO:0043565                   | 1.61E-08 | sequence-specific DNA binding                            |
| GO:0005515                   | 2.23E-05 | protein binding                                          |
| GO:0005089                   | 4.38E-05 | Rho guanyl-nucleotide exchange factor activity           |
| GO:0003702                   | 1.09E-04 | RNA polymerase II transcription factor activity          |
| GO:0004714                   | 1.09E-04 | transmembrane receptor protein tyrosine kinase activity  |
| GO:0004871                   | 1.62E-04 | signal transducer activity                               |
| GO:0004672                   | 1.87E-04 | protein kinase activity                                  |
| GO:0008270                   | 2.93E-04 | zinc ion binding                                         |
| GO:0003707                   | 3.28E-04 | steroid hormone receptor activity                        |
| GO:0004879                   | 3.28E-04 | ligand-dependent nuclear receptor activity               |
| GO:0008227                   | 4.83E-04 | amine receptor activity                                  |
| GO:0003713                   | 5.28E-04 | transcription coactivator activity                       |
| GO:0008134                   | 7.22E-04 | transcription factor binding                             |
| GO:0000166                   | 7.22E-04 | nucleotide binding                                       |
| GO:0003729                   | 1.66E-03 | mRNA binding                                             |
| GO:0004713                   | 1.68E-03 | protein tyrosine kinase activity                         |
| GO:0003779                   | 1.76E-03 | actin binding                                            |
| GO:0005509                   | 1.89E-03 | calcium ion binding                                      |
| GO:0008188                   | 1.89E-03 | neuropeptide receptor activity                           |
| GO:0004674                   | 1.90E-03 | protein serine/threonine kinase activity                 |
| GO:0003704                   | 2.08E-03 | specific RNA polymerase II transcription factor activity |
| GO:0019992                   | 2.68E-03 | diacylglycerol binding                                   |
| GO:0008092                   | 2.68E-03 | cytoskeletal protein binding                             |
| GO:0004888                   | 2.68E-03 | transmembrane receptor activity                          |
| GO:0005096                   | 4.22E-03 | GTPase activator activity                                |
| GO:0003714                   | 4.22E-03 | transcription corepressor activity                       |
| GO:0004725                   | 5.05E-03 | protein tyrosine phosphatase activity                    |
| GO:0005524                   | 5.99E-03 | ATP binding                                              |
| GO:0016563                   | 7.45E-03 | transcription activator activity                         |
| GO:0005102                   | 7.82E-03 | receptor binding                                         |
| GO:0003677                   | 8.76E-03 | DNA binding                                              |
| GO:0042803                   | 9.25E-03 | protein homodimerization activity                        |
| GO:0005085                   | 1.00E-02 | guanyl-nucleotide exchange factor activity               |
| GO:0008017                   | 1.18E-02 | microtubule binding                                      |
| GO:0004930                   | 1.23E-02 | G-protein coupled receptor activity                      |
| GO:0003774                   | 1.87E-02 | motor activity                                           |
| GO:0003723                   | 1.95E-02 | RNA binding                                              |
| GO:0008083                   | 2.42E-02 | growth factor activity                                   |
| GO:0032183                   | 2.42E-02 | SUMO binding                                             |

|            |          |                            |
|------------|----------|----------------------------|
| GO:0042623 | 2.42E-02 | ATPase activity, coupled   |
| GO:0003676 | 4.34E-02 | nucleic acid binding       |
| GO:0003777 | 4.95E-02 | microtubule motor activity |

---

**Table S15 GO term enrichment for molecular function in the North American cline for genes that overlap windows in the top 5% tail of Fst.**

| 5% Tail Molecular Function |          |                                                                     |
|----------------------------|----------|---------------------------------------------------------------------|
| GO term                    | q-value  | description                                                         |
| GO:0019904                 | 0.00E+00 | protein domain specific binding                                     |
| GO:0003700                 | 9.43E-13 | transcription factor activity                                       |
| GO:0043565                 | 5.69E-09 | sequence-specific DNA binding                                       |
| GO:0005515                 | 6.05E-09 | protein binding                                                     |
| GO:0005089                 | 1.47E-07 | Rho guanyl-nucleotide exchange factor activity                      |
| GO:0003704                 | 1.19E-06 | specific RNA polymerase II transcription factor activity            |
| GO:0005509                 | 6.53E-06 | calcium ion binding                                                 |
| GO:0004871                 | 1.82E-05 | signal transducer activity                                          |
| GO:0008270                 | 4.25E-05 | zinc ion binding                                                    |
| GO:0003702                 | 5.31E-05 | RNA polymerase II transcription factor activity                     |
| GO:0016563                 | 6.32E-05 | transcription activator activity                                    |
| GO:0017147                 | 7.70E-05 | Wnt-protein binding                                                 |
| GO:0004674                 | 2.20E-04 | protein serine/threonine kinase activity                            |
| GO:0004714                 | 3.05E-04 | transmembrane receptor protein tyrosine kinase activity             |
| GO:0005267                 | 3.09E-04 | potassium channel activity                                          |
| GO:0008188                 | 3.09E-04 | neuropeptide receptor activity                                      |
| GO:0003779                 | 4.30E-04 | actin binding                                                       |
| GO:0008017                 | 5.96E-04 | microtubule binding                                                 |
| GO:0004879                 | 8.37E-04 | ligand-dependent nuclear receptor activity                          |
| GO:0003707                 | 8.37E-04 | steroid hormone receptor activity                                   |
| GO:0004672                 | 8.90E-04 | protein kinase activity                                             |
| GO:0005041                 | 1.27E-03 | low-density lipoprotein receptor activity                           |
| GO:0004888                 | 1.63E-03 | transmembrane receptor activity                                     |
| GO:0003713                 | 1.63E-03 | transcription coactivator activity                                  |
| GO:0004713                 | 1.88E-03 | protein tyrosine kinase activity                                    |
| GO:0008227                 | 2.12E-03 | amine receptor activity                                             |
| GO:0008134                 | 2.31E-03 | transcription factor binding                                        |
| GO:0005326                 | 2.31E-03 | neurotransmitter transporter activity                               |
| GO:0004889                 | 3.22E-03 | nicotinic acetylcholine-activated cation-selective channel activity |
| GO:0005524                 | 3.50E-03 | ATP binding                                                         |
| GO:0032183                 | 4.08E-03 | SUMO binding                                                        |
| GO:0003714                 | 5.58E-03 | transcription corepressor activity                                  |
| GO:0005096                 | 5.58E-03 | GTPase activator activity                                           |
| GO:0005102                 | 7.22E-03 | receptor binding                                                    |
| GO:0003677                 | 7.22E-03 | DNA binding                                                         |
| GO:0004725                 | 1.73E-02 | protein tyrosine phosphatase activity                               |
| GO:0008092                 | 1.97E-02 | cytoskeletal protein binding                                        |
| GO:0005112                 | 2.38E-02 | Notch binding                                                       |
| GO:0042803                 | 2.51E-02 | protein homodimerization activity                                   |
| GO:0042623                 | 2.97E-02 | ATPase activity, coupled                                            |

|            |          |                                                        |
|------------|----------|--------------------------------------------------------|
| GO:0005085 | 3.07E-02 | guanyl-nucleotide exchange factor activity             |
| GO:0030528 | 3.28E-02 | transcription regulator activity                       |
| GO:0004930 | 3.32E-02 | G-protein coupled receptor activity                    |
| GO:0000166 | 4.61E-02 | nucleotide binding                                     |
| GO:0000287 | 4.61E-02 | magnesium ion binding                                  |
| GO:0004653 | 4.93E-02 | polypeptide N-acetylgalactosaminyltransferase activity |
| GO:0050839 | 4.93E-02 | cell adhesion molecule binding                         |
| GO:0003729 | 4.93E-02 | mRNA binding                                           |
| GO:0019992 | 4.98E-02 | diacylglycerol binding                                 |

---

**Table S16 GO term enrichment for cellular component in the North American cline for genes that overlap windows in the top 1% tail of Fst.**

| 1 % Tail Cellular Component |          |                                |
|-----------------------------|----------|--------------------------------|
| GO term                     | q-value  | description                    |
| GO:0005634                  | 6.87E-09 | nucleus                        |
| GO:0005622                  | 4.74E-03 | intracellular                  |
| GO:0005886                  | 4.74E-03 | plasma membrane                |
| GO:0016021                  | 2.47E-02 | integral to membrane           |
| GO:0005875                  | 2.47E-02 | microtubule associated complex |
| GO:0005938                  | 2.47E-02 | cell cortex                    |
| GO:0005887                  | 2.47E-02 | integral to plasma membrane    |
| GO:0016020                  | 2.93E-02 | membrane                       |
| GO:0005737                  | 4.09E-02 | cytoplasm                      |
| GO:0005794                  | 4.95E-02 | Golgi apparatus                |

**Table S17 GO term enrichment for cellular component in the North American cline for genes that overlap windows in the top 2.5% tail of *Fst*.**

| 2.5% Tail Cellular Component |          |                                    |
|------------------------------|----------|------------------------------------|
| GO term                      | q-value  | description                        |
| GO:0005634                   | 2.94E-12 | nucleus                            |
| GO:0005886                   | 8.90E-10 | plasma membrane                    |
| GO:0005737                   | 1.72E-04 | cytoplasm                          |
| GO:0045211                   | 8.60E-04 | postsynaptic membrane              |
| GO:0016021                   | 8.60E-04 | integral to membrane               |
| GO:0005622                   | 8.60E-04 | intracellular                      |
| GO:0005578                   | 8.60E-04 | proteinaceous extracellular matrix |
| GO:0045179                   | 8.60E-04 | apical cortex                      |
| GO:0005887                   | 1.11E-03 | integral to plasma membrane        |
| GO:0045202                   | 2.75E-03 | synapse                            |
| GO:0005918                   | 3.83E-03 | septate junction                   |
| GO:0005875                   | 4.55E-03 | microtubule associated complex     |
| GO:0016459                   | 6.83E-03 | myosin complex                     |
| GO:0005794                   | 1.15E-02 | Golgi apparatus                    |
| GO:0005938                   | 1.15E-02 | cell cortex                        |
| GO:0005576                   | 2.29E-02 | extracellular region               |
| GO:0005912                   | 2.30E-02 | adherens junction                  |
| GO:0005700                   | 2.37E-02 | polytene chromosome                |
| GO:0016020                   | 4.28E-02 | membrane                           |
| GO:0008021                   | 4.90E-02 | synaptic vesicle                   |



**Table S18 GO term enrichment for cellular component in the North American cline for genes that overlap windows in the top 5% tail of Fst.**

| GO term    | 5% Tail Cellular Component |                                                        |
|------------|----------------------------|--------------------------------------------------------|
|            | q-value                    | description                                            |
| GO:0005634 | 6.54E-12                   | nucleus                                                |
| GO:0005886 | 5.50E-10                   | plasma membrane                                        |
| GO:0005622 | 5.70E-07                   | intracellular                                          |
| GO:0005737 | 2.14E-04                   | cytoplasm                                              |
| GO:0045179 | 2.14E-04                   | apical cortex                                          |
| GO:0005578 | 4.05E-04                   | proteinaceous extracellular matrix                     |
| GO:0016021 | 4.33E-04                   | integral to membrane                                   |
| GO:0005887 | 9.71E-04                   | integral to plasma membrane                            |
| GO:0035003 | 9.71E-04                   | subapical complex                                      |
| GO:0005938 | 1.01E-03                   | cell cortex                                            |
| GO:0009986 | 1.09E-03                   | cell surface                                           |
| GO:0005918 | 1.47E-03                   | septate junction                                       |
| GO:0045211 | 2.63E-03                   | postsynaptic membrane                                  |
| GO:0005875 | 3.15E-03                   | microtubule associated complex                         |
| GO:0005892 | 3.25E-03                   | nicotinic acetylcholine-gated receptor-channel complex |
| GO:0016324 | 3.57E-03                   | apical plasma membrane                                 |
| GO:0016459 | 1.42E-02                   | myosin complex                                         |
| GO:0005768 | 1.42E-02                   | endosome                                               |
| GO:0005794 | 1.64E-02                   | Golgi apparatus                                        |
| GO:0005795 | 1.90E-02                   | Golgi stack                                            |
| GO:0045172 | 2.14E-02                   | germline ring canal                                    |
| GO:0030135 | 2.14E-02                   | coated vesicle                                         |
| GO:0000775 | 2.40E-02                   | chromosome, centromeric region                         |
| GO:0005813 | 3.04E-02                   | centrosome                                             |
| GO:0045177 | 3.04E-02                   | apical part of cell                                    |
| GO:0005868 | 3.04E-02                   | cytoplasmic dynein complex                             |
| GO:0005912 | 3.39E-02                   | adherens junction                                      |
| GO:0045202 | 3.69E-02                   | synapse                                                |
| GO:0005874 | 3.69E-02                   | microtubule                                            |
| GO:0043190 | 4.14E-02                   | ATP-binding cassette (ABC) transporter complex         |
| GO:0005576 | 4.25E-02                   | extracellular region                                   |
| GO:0016020 | 4.75E-02                   | membrane                                               |

**Table S19 Annotations of single nucleotide polymorphisms present on both continents**

---

|                 | All shared SNPs | All convergent SNPs | Strongly convergent SNPs (top 10% FST on both continents) |
|-----------------|-----------------|---------------------|-----------------------------------------------------------|
| All annotations | 361171          | 229705              | 4038                                                      |
| Three Prime UTR | 11399           | 6552                | 107                                                       |
| Five prime UTR  | 8684            | 5107                | 99                                                        |
| Nonsynonymous   | 13526           | 8811                | 147                                                       |
| Synonymous      | 45398           | 29450               | 499                                                       |
| Intronic        | 150302          | 97021               | 1754                                                      |
| Intergenic      | 131799          | 82754               | 1432                                                      |

---

**Table S20 Functional annotation of strongly convergent UTR and nonsynonymous SNPs**

Available for download at <http://www.genetics.org/lookup/suppl/doi:10.1534/genetics.114.161463/-/DC1>

**Table S21 Functional annotation of extremely differentiated convergent SNPs**

| Chr | Position | SNP classification | Fbgn        | Gene Name                     | Functional Summary                                | AUFST    | NAFST    | Codon change | AA change |
|-----|----------|--------------------|-------------|-------------------------------|---------------------------------------------------|----------|----------|--------------|-----------|
| 3R  | 15229365 | five prime UTR     | FBgn0038704 | Aprataxin-like protein        | DNA repair, metal binding                         | 5.24E-01 | 6.31E-01 | NA           | NA        |
| 3R  | 12842274 | five prime UTR     | FBgn0004577 | Dmel_CG15337                  | Unknown                                           | 5.26E-01 | 5.22E-01 | NA           | NA        |
| X   | 8054656  | nonsynonymous      | FBgn0030014 | Dmel_CG31091                  | lipid and ester catabolism                        | 5.12E-01 | 4.65E-01 | ATG->TTG     | M->L      |
| 2R  | 7013061  | nonsynonymous      | FBgn0053503 | Dmel_CG4218                   | Unknown                                           | 8.23E-01 | 6.75E-01 | TTA->TCA     | L->S      |
| 2L  | 14547899 | nonsynonymous      | FBgn0250844 | Dmel_CG6454                   | calcium channel membrane targeting                | 5.12E-01 | 4.65E-01 | AAG->ATG     | K->M      |
| 3R  | 20766471 | nonsynonymous      | FBgn0029157 | Peroxidase                    | response to oxidative stress /peroxide metabolism | 8.23E-01 | 5.46E-01 | TTG->TTC     | L->F      |
| 3R  | 20177828 | nonsynonymous      | FBgn0039187 | Probable cytochrome P450 12d1 | oxidation/reduction, metal binding                | 6.44E-01 | 6.45E-01 | ACT->AGT     | T->S      |
| 3R  | 21727544 | nonsynonymous      | FBgn0051091 | slingshot                     | eye development/mushroom body development         | 7.39E-01 | 7.55E-01 | TCC->GCC     | S->A      |

**Table S22 Candidate convergent nonsynonymous SNPs**

| Position       | N1              | N2 | Fst  | Codon   | AA  | mel and outgroup ref sequence state                       |
|----------------|-----------------|----|------|---------|-----|-----------------------------------------------------------|
| hkl            |                 |    |      |         |     |                                                           |
| AUS 19,045,921 | 20              | 29 | 0.34 | aac/gac | N/D | D= mel,sim, sech, yak, ere; Q = ana                       |
| AUS 19,045,936 | 20              | 30 | 0.21 | aaa/gaa | K/E | many changes from E to K and reverse                      |
| NA 19,045,921  | not segregating |    |      |         |     |                                                           |
| NA 19,045,936  | not segregating |    |      |         |     |                                                           |
| NA 19,046,788  | 28              | 34 | 0.35 | aca/cca | T/P | P = mel,sim, sech, yak, ere, ana; other species not T     |
| NA 19,046,828  | 29              | 27 | 0.48 | aac/agc | N/S | S=mel,sim,sech,ana,pse,pers,vir,moj,grim; T = ere, L=will |
| AUS 19,046,788 | not segregating |    |      |         |     |                                                           |
| AUS 19,046,828 | not segregating |    |      |         |     |                                                           |
| otk            |                 |    |      |         |     |                                                           |
| AUS 7,890,468  | 29              | 22 | 0.38 | gtg/ctg | V/L | L = all species                                           |
| AUS 7,890,646  | 18              | 26 | 0.33 | gat/gag | D/E | D = mel; E = other species                                |
| AUS 7,901,503  | 36              | 43 | 0.26 | ttg/tcg | L/S | L = all species                                           |
| NA 7,890,468   | not segregating |    |      |         |     |                                                           |
| NA 7,890,646   | not segregating |    |      |         |     |                                                           |
| NA 7,901,503   | not segregating |    |      |         |     |                                                           |
| NA 7,892,834   |                 |    | 0.71 | tct/gct |     | S/A                                                       |
| NA 7,892,839   |                 |    | 0.70 | agc/aac | S/N |                                                           |
| AUS 7,892,834  | not segregating |    |      |         |     |                                                           |
| AUS 7,892,839  | not segregating |    |      |         |     |                                                           |

| Position       | N1              | N2 | Fst   | Codon   | AA  | mel and outgroup ref sequence state |
|----------------|-----------------|----|-------|---------|-----|-------------------------------------|
| ana1           |                 |    |       |         |     |                                     |
| AUS 20,359,353 | 31              | 37 | 0.36  | gag/gcg | E/A | E=mel;A=sim,sech,yak,ere            |
| AUS 20,359,385 | 33              | 36 | 0.45  | cga/gga | R/G | R=mel,sim,yak,ere,ana               |
| NA 20,359,353  | 15              | 49 | 0.007 |         |     |                                     |
| NA 20,359,385  | not segregating |    |       |         |     |                                     |

|                |    |    |       |         |         |                                                                    |
|----------------|----|----|-------|---------|---------|--------------------------------------------------------------------|
| NA 20,360,921  | 36 | 52 | 0.33  | atg/ctg | M/L     | L=all flies except virilis; virilis=M                              |
| NA 20,361,171  | 36 | 39 | 0.38  | cag/ctg | Q/L     | Q= mel, si, sech,yak, pse, pers. will, moj; R=ere;H=ana;L=vir, gri |
| AUS 20,360,921 | 43 | 28 | 0.007 |         |         |                                                                    |
| AUS 20,361,171 | 35 | 27 | 0.06  |         |         |                                                                    |
| Chm            |    |    |       |         |         |                                                                    |
| AUS 7,413,693  | 23 | 29 | 0.52  | cag/gag | Q/E     | Q= all species                                                     |
| NA 7,413,693   |    |    |       |         |         | not segregating                                                    |
| NA 7,412,813   |    | 30 | 56    | 0.24    | gat/tat | D/Y Y=mel;D=si, sech, yak, ere, ana, wil, vir, moj, gri;E=pse,pers |
| NA 7,413,132   |    | 23 | 36    | 0.22    | cca/cga | P/R R=all species; no data for willistoni                          |
| AUS 7,412,813  |    |    |       |         |         | not segregating                                                    |
| AUS 7,413,132  |    |    |       |         |         | not segregating                                                    |
| Trp            |    |    |       |         |         |                                                                    |
| AUS 25,740,476 | 20 | 24 | 0.35  | ggc/agc | G/S     | S=mel;G=sim,sech,yak,ere,ana,;A=pse;T=will, other no data          |
| AUS 25,741,376 | 36 | 27 | 0.22  | tca/cca | S/P     | P=mel,si,sech,ya,ere,ana,pse,pers,will;T=vir,gri;others ND         |
| NA 25,740,476  | 38 | 52 | 0.02  |         |         |                                                                    |
| NA 25,741,376  | 36 | 56 | 0.06  |         |         |                                                                    |
| NA 25,741,665  | 27 | 28 | 0.34  | ttc/tcc | F/S     | S=mel,sim,sech,yak,ere;A=ana,pse.pers.will.moj.gri                 |
| NA 25,743,316  | 32 | 40 | 0.24  | cac/aac | H/N     | N=ana; H=all other species                                         |
| AUS 25,741,665 |    |    |       |         |         | not segregating                                                    |
| AUS 25,743,316 | 27 | 18 | 0.10  |         |         |                                                                    |

---

CANDIDATE NORTH AMERICAN SPECIFIC DIFFERENTIATED NONSYNONYMOUS SNPS

| Gene          | Position   | N1                     | N2 | Fst  | codon   | residue | references sequence states                                |
|---------------|------------|------------------------|----|------|---------|---------|-----------------------------------------------------------|
| Lsp2 (3L)     | 12,122,543 | 37                     | 36 | 0.41 | atg/gtg | M/V     | V=mel,sim,sech,yak,ere,ana,pse,pers,grim;<br>L=wil,vi,moj |
|               |            | Not segregating in AUS |    |      |         |         |                                                           |
| Oatp33Ea (2L) | 12,442,835 | 31                     | 65 | 0.50 | tgt/ggt | C/G     | L=all species                                             |
| In AUS        |            | 29                     | 37 | 0.08 |         |         |                                                           |

---

**Table S23.**

---

| Seed length | Average coverage |      | Number of fixed or polymorphic bases |       | Number of singleton bases |        |
|-------------|------------------|------|--------------------------------------|-------|---------------------------|--------|
|             | 30               | 45   | 30                                   | 45    | 30                        | 45     |
| k1n3        | 25.4             | 25.1 | 15801                                | 15336 | 74753                     | 72716  |
| k2n5        | 30               | 29.9 | 19737                                | 19522 | 149263                    | 148169 |
| k3n7        | 32               | 32   | 22457                                | 22306 | 157904                    | 157193 |
| k4n9        | 32.4             | 32.4 | 23891                                | 23744 | 160718                    | 160294 |

---

s = seed length k = number of errors allowed in the seed

n = number of errors allowed in the entire read

**Table S24 Genome-wide average pairwise 1KB window Fst**

|       | FLA | MAINE | QUE   | TAZ   |
|-------|-----|-------|-------|-------|
| FLA   | -   | 0.066 | 0.063 | 0.077 |
| MAINE | -   | -     | 0.066 | 0.067 |
| QUE   | -   | -     | -     | 0.072 |
| TAZ   | -   | -     | -     | -     |



**Table S25 ChrX average pairwise 1KB window Fst**

|       | FLA | MAINE | QUE   | TAZ   |
|-------|-----|-------|-------|-------|
| FLA   | -   | 0.061 | 0.061 | 0.071 |
| MAINE | -   | -     | 0.058 | 0.069 |
| QUE   | -   | -     | -     | 0.06  |
| TAZ   | -   | -     | -     | -     |

**Table S26 Chr2L average pairwise 1KB window Fst**

|       | FLA | MAINE | QUE   | TAZ   |
|-------|-----|-------|-------|-------|
| FLA   | -   | 0.069 | 0.063 | 0.083 |
| MAINE | -   | -     | 0.068 | 0.067 |
| QUE   | -   | -     | -     | 0.075 |
| TAZ   | -   | -     | -     | -     |

**Table S27 Chr2R average pairwise 1KB window Fst**

|       | FLA | MAINE | QUE   | TAZ   |
|-------|-----|-------|-------|-------|
| FLA   | -   | 0.062 | 0.064 | 0.073 |
| MAINE | -   | -     | 0.062 | 0.067 |
| QUE   | -   | -     | -     | 0.067 |
| TAZ   | -   | -     | -     | -     |

**Table S28 Chr3L average pairwise 1KB window Fst**

|       | FLA | MAINE | QUE   | TAZ   |
|-------|-----|-------|-------|-------|
| FLA   | -   | 0.065 | 0.064 | 0.077 |
| MAINE | -   | -     | 0.064 | 0.069 |
| QUE   | -   | -     | -     | 0.072 |
| TAZ   | -   | -     | -     | -     |

**Table S29 Chr3R average pairwise 1KB window Fst**

|       | FLA | MAINE | QUE   | TAZ   |
|-------|-----|-------|-------|-------|
| FLA   | -   | 0.071 | 0.064 | 0.081 |
| MAINE | -   | -     | 0.076 | 0.06  |
| QUE   | -   | -     | -     | 0.083 |
| TAZ   | -   | -     | -     | -     |
