# Supplementary material
Source: PubMed Central journal article supplement (PMC4012493)
Supplement: supp_114.161463_TableS1.pdf [file supp_114.161463_TableS1.pdf]

**Table S1 GO term enrichment for biological process in the Australian cline for genes that overlap windows in the top 1% tail of Fst.**

| GO term    | 1 % Tail Biological Process |                                                    |
|------------|-----------------------------|----------------------------------------------------|
|            | q-value                     | description                                        |
| GO:0008355 | 4.99E-06                    | olfactory learning                                 |
| GO:0007611 | 9.11E-06                    | learning or memory                                 |
| GO:0001738 | 9.68E-05                    | morphogenesis of a polarized epithelium            |
| GO:0007156 | 9.68E-05                    | homophilic cell adhesion                           |
| GO:0008285 | 9.68E-05                    | negative regulation of cell proliferation          |
| GO:0007165 | 9.68E-05                    | signal transduction                                |
| GO:0007306 | 1.74E-04                    | eggshell chorion assembly                          |
| GO:0007507 | 2.37E-04                    | heart development                                  |
| GO:0007427 | 2.68E-04                    | epithelial cell migration, open tracheal system    |
| GO:0051276 | 3.00E-04                    | chromosome organization                            |
| GO:0008104 | 3.08E-04                    | protein localization                               |
| GO:0017148 | 3.71E-04                    | negative regulation of translation                 |
| GO:0007623 | 4.62E-04                    | circadian rhythm                                   |
| GO:0007155 | 6.08E-04                    | cell adhesion                                      |
| GO:0006811 | 6.12E-04                    | ion transport                                      |
| GO:0002009 | 7.72E-04                    | morphogenesis of an epithelium                     |
| GO:0007424 | 8.38E-04                    | open tracheal system development                   |
| GO:0048477 | 9.93E-04                    | oogenesis                                          |
| GO:0007391 | 1.23E-03                    | dorsal closure                                     |
| GO:0007435 | 1.23E-03                    | salivary gland morphogenesis                       |
| GO:0045475 | 1.36E-03                    | locomotor rhythm                                   |
| GO:0006355 | 1.37E-03                    | regulation of transcription, DNA-dependent         |
| GO:0007275 | 1.37E-03                    | multicellular organismal development               |
| GO:0006468 | 1.73E-03                    | protein amino acid phosphorylation                 |
| GO:0007476 | 4.39E-03                    | imaginal disc-derived wing morphogenesis           |
| GO:0002121 | 6.46E-03                    | inter-male aggressive behavior                     |
| GO:0006813 | 6.60E-03                    | potassium ion transport                            |
| GO:0048749 | 9.21E-03                    | compound eye development                           |
| GO:0045449 | 1.17E-02                    | regulation of transcription                        |
| GO:0007411 | 1.24E-02                    | axon guidance                                      |
| GO:0016319 | 1.38E-02                    | mushroom body development                          |
| GO:0007298 | 1.40E-02                    | border follicle cell migration                     |
| GO:0001700 | 1.87E-02                    | embryonic development via the syncytial blastoderm |
| GO:0007015 | 2.28E-02                    | actin filament organization                        |
| GO:0001745 | 2.73E-02                    | compound eye morphogenesis                         |
| GO:0006814 | 2.94E-02                    | sodium ion transport                               |
| GO:0008360 | 4.19E-02                    | regulation of cell shape                           |
| GO:0055085 | 4.19E-02                    | transmembrane transport                            |
| GO:0007269 | 4.73E-02                    | neurotransmitter secretion                         |
| GO:0016192 | 4.95E-02                    | vesicle-mediated transport                         |
