# Supplementary material
Source: PubMed Central journal article supplement (PMC4012493)
Supplement: supp_114.161463_TableS2.pdf [file supp_114.161463_TableS2.pdf]

**Table S2 GO term enrichment for biological process in the Australian cline for genes that overlap windows in the top 2.5% tail of Fst.**

| 2.5 % Tail Biological Process |          |                                                     |
|-------------------------------|----------|-----------------------------------------------------|
| GO term                       | q-value  | description                                         |
| GO:0006355                    | 2.24E-07 | regulation of transcription, DNA-dependent          |
| GO:0007611                    | 1.26E-06 | learning or memory                                  |
| GO:0006468                    | 1.26E-06 | protein amino acid phosphorylation                  |
| GO:0008543                    | 3.05E-06 | fibroblast growth factor receptor signaling pathway |
| GO:0007476                    | 3.11E-06 | imaginal disc-derived wing morphogenesis            |
| GO:0008284                    | 3.49E-06 | positive regulation of cell proliferation           |
| GO:0007424                    | 5.44E-06 | open tracheal system development                    |
| GO:0008355                    | 1.11E-05 | olfactory learning                                  |
| GO:0007156                    | 1.56E-05 | homophilic cell adhesion                            |
| GO:0007435                    | 1.87E-05 | salivary gland morphogenesis                        |
| GO:0007155                    | 1.87E-05 | cell adhesion                                       |
| GO:0007275                    | 1.87E-05 | multicellular organismal development                |
| GO:0007507                    | 1.87E-05 | heart development                                   |
| GO:0046331                    | 1.87E-05 | lateral inhibition                                  |
| GO:0007280                    | 4.39E-05 | pole cell migration                                 |
| GO:0007513                    | 4.39E-05 | pericardial cell differentiation                    |
| GO:0007427                    | 4.39E-05 | epithelial cell migration, open tracheal system     |
| GO:0008406                    | 4.76E-05 | gonad development                                   |
| GO:0048190                    | 4.98E-05 | wing disc dorsal/ventral pattern formation          |
| GO:0007411                    | 5.20E-05 | axon guidance                                       |
| GO:0048477                    | 7.54E-05 | oogenesis                                           |
| GO:0007623                    | 1.42E-04 | circadian rhythm                                    |
| GO:0048749                    | 1.42E-04 | compound eye development                            |
| GO:0008104                    | 1.70E-04 | protein localization                                |
| GO:0007391                    | 2.08E-04 | dorsal closure                                      |
| GO:0007419                    | 2.14E-04 | ventral cord development                            |
| GO:0007398                    | 3.20E-04 | ectoderm development                                |
| GO:0045475                    | 3.20E-04 | locomotor rhythm                                    |
| GO:0001751                    | 3.20E-04 | compound eye photoreceptor cell differentiation     |
| GO:0001738                    | 3.82E-04 | morphogenesis of a polarized epithelium             |
| GO:0008345                    | 3.82E-04 | larval locomotory behavior                          |
| GO:0007509                    | 4.07E-04 | mesoderm migration                                  |
| GO:0007498                    | 4.07E-04 | mesoderm development                                |
| GO:0035225                    | 4.07E-04 | determination of genital disc primordium            |
| GO:0008354                    | 4.07E-04 | germ cell migration                                 |
| GO:0007617                    | 4.07E-04 | mating behavior                                     |
| GO:0006811                    | 4.92E-04 | ion transport                                       |
| GO:0007219                    | 4.92E-04 | Notch signaling pathway                             |

|            |          |                                                                                    |
|------------|----------|------------------------------------------------------------------------------------|
| GO:0007428 | 5.97E-04 | primary branching, open tracheal system                                            |
| GO:0007274 | 6.14E-04 | neuromuscular synaptic transmission                                                |
| GO:0008356 | 6.14E-04 | asymmetric cell division                                                           |
| GO:0051225 | 6.14E-04 | spindle assembly                                                                   |
| GO:0045433 | 7.31E-04 | male courtship behavior, veined wing generated song production                     |
| GO:0045187 | 7.31E-04 | regulation of circadian sleep/wake cycle, sleep                                    |
| GO:0010552 | 7.31E-04 | positive regulation of gene-specific transcription from RNA polymerase II promoter |
| GO:0016477 | 8.59E-04 | cell migration                                                                     |
| GO:0008285 | 8.59E-04 | negative regulation of cell proliferation                                          |
| GO:0007480 | 8.59E-04 | imaginal disc-derived leg morphogenesis                                            |
| GO:0007165 | 8.59E-04 | signal transduction                                                                |
| GO:0002121 | 8.89E-04 | inter-male aggressive behavior                                                     |
| GO:0042127 | 1.20E-03 | regulation of cell proliferation                                                   |
| GO:0048675 | 1.20E-03 | axon extension                                                                     |
| GO:0008407 | 1.20E-03 | bristle morphogenesis                                                              |
| GO:0007622 | 1.20E-03 | rhythmic behavior                                                                  |
| GO:0016079 | 1.20E-03 | synaptic vesicle exocytosis                                                        |
| GO:0008344 | 1.24E-03 | adult locomotory behavior                                                          |
| GO:0001709 | 1.24E-03 | cell fate determination                                                            |
| GO:0008347 | 1.24E-03 | glial cell migration                                                               |
| GO:0007494 | 1.64E-03 | midgut development                                                                 |
| GO:0002009 | 1.64E-03 | morphogenesis of an epithelium                                                     |
| GO:0035023 | 1.64E-03 | regulation of Rho protein signal transduction                                      |
| GO:0045449 | 1.71E-03 | regulation of transcription                                                        |
| GO:0007268 | 1.77E-03 | synaptic transmission                                                              |
| GO:0016360 | 1.77E-03 | sensory organ precursor cell fate determination                                    |
| GO:0007390 | 1.77E-03 | germ-band shortening                                                               |
| GO:0007475 | 1.77E-03 | apposition of dorsal and ventral imaginal disc-derived wing surfaces               |
| GO:0000902 | 1.77E-03 | cell morphogenesis                                                                 |
| GO:0055085 | 1.77E-03 | transmembrane transport                                                            |
| GO:0008049 | 2.57E-03 | male courtship behavior                                                            |
| GO:0007431 | 2.57E-03 | salivary gland development                                                         |
| GO:0030707 | 2.66E-03 | ovarian follicle cell development                                                  |
| GO:0008340 | 3.61E-03 | determination of adult lifespan                                                    |
| GO:0042052 | 3.61E-03 | rhabdomere development                                                             |
| GO:0007314 | 3.61E-03 | oocyte anterior/posterior axis specification                                       |
| GO:0007298 | 3.68E-03 | border follicle cell migration                                                     |
| GO:0007306 | 4.11E-03 | eggshell chorion assembly                                                          |
| GO:0051017 | 4.11E-03 | actin filament bundle formation                                                    |
| GO:0001745 | 4.11E-03 | compound eye morphogenesis                                                         |
| GO:0008587 | 4.11E-03 | imaginal disc-derived wing margin morphogenesis                                    |
| GO:0016055 | 4.73E-03 | Wnt receptor signaling pathway                                                     |
| GO:0030162 | 4.75E-03 | regulation of proteolysis                                                          |

|            |          |                                                             |
|------------|----------|-------------------------------------------------------------|
| GO:0030718 | 4.82E-03 | germ-line stem cell maintenance                             |
| GO:0035277 | 5.70E-03 | spiracle morphogenesis, open tracheal system                |
| GO:0008103 | 5.70E-03 | oocyte microtubule cytoskeleton polarization                |
| GO:0006914 | 5.70E-03 | autophagy                                                   |
| GO:0035147 | 5.70E-03 | branch fusion, open tracheal system                         |
| GO:0007269 | 6.05E-03 | neurotransmitter secretion                                  |
| GO:0007367 | 6.05E-03 | segment polarity determination                              |
| GO:0007619 | 6.05E-03 | courtship behavior                                          |
| GO:0008586 | 7.37E-03 | imaginal disc-derived wing vein morphogenesis               |
| GO:0051276 | 7.37E-03 | chromosome organization                                     |
| GO:0007616 | 7.37E-03 | long-term memory                                            |
| GO:0009408 | 7.37E-03 | response to heat                                            |
| GO:0006816 | 7.37E-03 | calcium ion transport                                       |
| GO:0019991 | 7.37E-03 | septate junction assembly                                   |
| GO:0007455 | 7.37E-03 | eye-antennal disc morphogenesis                             |
| GO:0007552 | 7.37E-03 | metamorphosis                                               |
| GO:0045892 | 7.50E-03 | negative regulation of transcription, DNA-dependent         |
| GO:0006813 | 7.95E-03 | potassium ion transport                                     |
| GO:0016319 | 8.34E-03 | mushroom body development                                   |
| GO:0008293 | 9.71E-03 | torso signaling pathway                                     |
| GO:0017148 | 9.77E-03 | negative regulation of translation                          |
| GO:0042078 | 9.77E-03 | germ-line stem cell division                                |
| GO:0033227 | 1.23E-02 | dsRNA transport                                             |
| GO:0007426 | 1.31E-02 | tracheal outgrowth, open tracheal system                    |
| GO:0046843 | 1.35E-02 | dorsal appendage formation                                  |
| GO:0007417 | 1.48E-02 | central nervous system development                          |
| GO:0045893 | 1.51E-02 | positive regulation of transcription, DNA-dependent         |
| GO:0006897 | 1.51E-02 | endocytosis                                                 |
| GO:0042067 | 1.67E-02 | establishment of ommatidial polarity                        |
| GO:0007444 | 1.88E-02 | imaginal disc development                                   |
| GO:0007242 | 1.98E-02 | intracellular signaling cascade                             |
| GO:0007399 | 2.06E-02 | nervous system development                                  |
| GO:0006325 | 2.10E-02 | chromatin organization                                      |
| GO:0007422 | 2.11E-02 | peripheral nervous system development                       |
| GO:0008360 | 2.18E-02 | regulation of cell shape                                    |
| GO:0006357 | 2.48E-02 | regulation of transcription from RNA polymerase II promoter |
| GO:0048666 | 2.70E-02 | neuron development                                          |
| GO:0006470 | 3.05E-02 | protein amino acid dephosphorylation                        |
| GO:0007317 | 3.14E-02 | regulation of pole plasm oskar mRNA localization            |
| GO:0007224 | 3.14E-02 | smoothened signaling pathway                                |
| GO:0008045 | 3.14E-02 | motor axon guidance                                         |
| GO:0042048 | 3.15E-02 | olfactory behavior                                          |
| GO:0001700 | 3.33E-02 | embryonic development via the syncytial blastoderm          |
| GO:0007423 | 3.49E-02 | sensory organ development                                   |

|            |          |                                                  |
|------------|----------|--------------------------------------------------|
| GO:0007474 | 3.69E-02 | imaginal disc-derived wing vein specification    |
| GO:0007163 | 3.69E-02 | establishment or maintenance of cell polarity    |
| GO:0007349 | 3.69E-02 | cellularization                                  |
| GO:0007015 | 4.26E-02 | actin filament organization                      |
| GO:0008595 | 4.39E-02 | determination of anterior/posterior axis, embryo |
| GO:0008063 | 4.39E-02 | Toll signaling pathway                           |

---
