# Supplementary material
Source: PubMed Central journal article supplement (PMC4012493)
Supplement: supp_114.161463_TableS3.pdf [file supp_114.161463_TableS3.pdf]

**Table S3 GO term enrichment for biological process in the Australian cline for genes that overlap windows in the top 5% tail of Fst.**

| GO term    | 5 % Tail Biological Process |                                                     |
|------------|-----------------------------|-----------------------------------------------------|
|            | q-value                     | description                                         |
| GO:0046331 | 0.00E+00                    | lateral inhibition                                  |
| GO:0016198 | 0.00E+00                    | axon choice point recognition                       |
| GO:0006355 | 4.83E-10                    | regulation of transcription, DNA-dependent          |
| GO:0007156 | 5.44E-08                    | homophilic cell adhesion                            |
| GO:0007411 | 5.39E-07                    | axon guidance                                       |
| GO:0006468 | 5.53E-07                    | protein amino acid phosphorylation                  |
| GO:0048190 | 2.06E-06                    | wing disc dorsal/ventral pattern formation          |
| GO:0007611 | 2.06E-06                    | learning or memory                                  |
| GO:0007476 | 2.67E-06                    | imaginal disc-derived wing morphogenesis            |
| GO:0008284 | 6.75E-06                    | positive regulation of cell proliferation           |
| GO:0042051 | 8.05E-06                    | compound eye photoreceptor development              |
| GO:0008543 | 9.53E-06                    | fibroblast growth factor receptor signaling pathway |
| GO:0007165 | 1.17E-05                    | signal transduction                                 |
| GO:0048477 | 3.51E-05                    | oogenesis                                           |
| GO:0008355 | 4.04E-05                    | olfactory learning                                  |
| GO:0007398 | 4.34E-05                    | ectoderm development                                |
| GO:0007424 | 4.98E-05                    | open tracheal system development                    |
| GO:0007507 | 5.28E-05                    | heart development                                   |
| GO:0007498 | 7.16E-05                    | mesoderm development                                |
| GO:0001709 | 7.16E-05                    | cell fate determination                             |
| GO:0048749 | 7.16E-05                    | compound eye development                            |
| GO:0002009 | 7.48E-05                    | morphogenesis of an epithelium                      |
| GO:0007415 | 8.57E-05                    | defasciculation of motor neuron axon                |
| GO:0007513 | 1.10E-04                    | pericardial cell differentiation                    |
| GO:0045570 | 1.10E-04                    | regulation of imaginal disc growth                  |
| GO:0007552 | 1.54E-04                    | metamorphosis                                       |
| GO:0008104 | 1.73E-04                    | protein localization                                |
| GO:0007155 | 2.35E-04                    | cell adhesion                                       |
| GO:0007419 | 2.35E-04                    | ventral cord development                            |
| GO:0008045 | 2.35E-04                    | motor axon guidance                                 |
| GO:0007427 | 2.35E-04                    | epithelial cell migration, open tracheal system     |
| GO:0055085 | 2.42E-04                    | transmembrane transport                             |
| GO:0007623 | 2.42E-04                    | circadian rhythm                                    |
| GO:0007391 | 2.42E-04                    | dorsal closure                                      |
| GO:0008406 | 2.46E-04                    | gonad development                                   |
| GO:0008356 | 2.62E-04                    | asymmetric cell division                            |
| GO:0048096 | 2.66E-04                    | chromatin-mediated maintenance of transcription     |
| GO:0035286 | 2.66E-04                    | leg segmentation                                    |
| GO:0046667 | 2.66E-04                    | compound eye retinal cell programmed cell death     |
| GO:0048814 | 2.66E-04                    | regulation of dendrite morphogenesis                |

|            |          |                                                                |
|------------|----------|----------------------------------------------------------------|
| GO:0045433 | 2.80E-04 | male courtship behavior, veined wing generated song production |
| GO:0007275 | 3.42E-04 | multicellular organismal development                           |
| GO:0008586 | 3.43E-04 | imaginal disc-derived wing vein morphogenesis                  |
| GO:0007314 | 4.38E-04 | oocyte anterior/posterior axis specification                   |
| GO:0042052 | 4.38E-04 | rhabdomere development                                         |
| GO:0008285 | 4.38E-04 | negative regulation of cell proliferation                      |
| GO:0007413 | 4.87E-04 | axonal fasciculation                                           |
| GO:0008407 | 4.87E-04 | bristle morphogenesis                                          |
| GO:0008354 | 5.13E-04 | germ cell migration                                            |
| GO:0007435 | 5.78E-04 | salivary gland morphogenesis                                   |
| GO:0006816 | 6.54E-04 | calcium ion transport                                          |
| GO:0046620 | 6.77E-04 | regulation of organ growth                                     |
| GO:0006811 | 6.97E-04 | ion transport                                                  |
| GO:0001751 | 7.25E-04 | compound eye photoreceptor cell differentiation                |
| GO:0042127 | 7.25E-04 | regulation of cell proliferation                               |
| GO:0007444 | 7.78E-04 | imaginal disc development                                      |
| GO:0048100 | 8.18E-04 | wing disc anterior/posterior pattern formation                 |
| GO:0007617 | 8.18E-04 | mating behavior                                                |
| GO:0035225 | 8.18E-04 | determination of genital disc primordium                       |
| GO:0015012 | 8.18E-04 | heparan sulfate proteoglycan biosynthetic process              |
| GO:0007509 | 8.18E-04 | mesoderm migration                                             |
| GO:0051017 | 8.81E-04 | actin filament bundle formation                                |
| GO:0030206 | 9.69E-04 | chondroitin sulfate biosynthetic process                       |
| GO:0010002 | 9.69E-04 | cardioblast differentiation                                    |
| GO:0009408 | 9.69E-04 | response to heat                                               |
| GO:0045449 | 9.76E-04 | regulation of transcription                                    |
| GO:0007274 | 1.01E-03 | neuromuscular synaptic transmission                            |
| GO:0007619 | 1.08E-03 | courtship behavior                                             |
| GO:0045475 | 1.08E-03 | locomotor rhythm                                               |
| GO:0001738 | 1.23E-03 | morphogenesis of a polarized epithelium                        |
| GO:0008345 | 1.23E-03 | larval locomotory behavior                                     |
| GO:0007298 | 1.23E-03 | border follicle cell migration                                 |
| GO:0007280 | 1.50E-03 | pole cell migration                                            |
| GO:0008347 | 1.50E-03 | glial cell migration                                           |
| GO:0008344 | 1.50E-03 | adult locomotory behavior                                      |
| GO:0035147 | 1.50E-03 | branch fusion, open tracheal system                            |
| GO:0007480 | 1.64E-03 | imaginal disc-derived leg morphogenesis                        |
| GO:0007219 | 1.77E-03 | Notch signaling pathway                                        |
| GO:0045187 | 1.77E-03 | regulation of circadian sleep/wake cycle, sleep                |
| GO:0001745 | 2.13E-03 | compound eye morphogenesis                                     |
| GO:0007428 | 2.37E-03 | primary branching, open tracheal system                        |
| GO:0007268 | 2.43E-03 | synaptic transmission                                          |
| GO:0007390 | 2.45E-03 | germ-band shortening                                           |
| GO:0016331 | 2.45E-03 | morphogenesis of embryonic epithelium                          |

|            |          |                                                                                    |
|------------|----------|------------------------------------------------------------------------------------|
| GO:0009649 | 2.45E-03 | entrainment of circadian clock                                                     |
| GO:0048149 | 2.45E-03 | behavioral response to ethanol                                                     |
| GO:0016332 | 2.45E-03 | establishment or maintenance of polarity of embryonic epithelium                   |
| GO:0016360 | 2.45E-03 | sensory organ precursor cell fate determination                                    |
| GO:0002121 | 2.45E-03 | inter-male aggressive behavior                                                     |
| GO:0030162 | 2.48E-03 | regulation of proteolysis                                                          |
| GO:0007422 | 2.50E-03 | peripheral nervous system development                                              |
| GO:0048675 | 3.39E-03 | axon extension                                                                     |
| GO:0007297 | 3.39E-03 | ovarian follicle cell migration                                                    |
| GO:0007622 | 3.39E-03 | rhythmic behavior                                                                  |
| GO:0007479 | 3.39E-03 | leg disc proximal/distal pattern formation                                         |
| GO:0008340 | 3.46E-03 | determination of adult lifespan                                                    |
| GO:0007010 | 3.46E-03 | cytoskeleton organization                                                          |
| GO:0007474 | 3.50E-03 | imaginal disc-derived wing vein specification                                      |
| GO:0008587 | 3.72E-03 | imaginal disc-derived wing margin morphogenesis                                    |
| GO:0007520 | 3.72E-03 | myoblast fusion                                                                    |
| GO:0016339 | 3.72E-03 | calcium-dependent cell-cell adhesion                                               |
| GO:0007242 | 3.86E-03 | intracellular signaling cascade                                                    |
| GO:0048666 | 4.48E-03 | neuron development                                                                 |
| GO:0006357 | 4.91E-03 | regulation of transcription from RNA polymerase II promoter                        |
| GO:0035172 | 5.04E-03 | hemocyte proliferation                                                             |
| GO:0007549 | 5.04E-03 | dosage compensation                                                                |
| GO:0008105 | 5.75E-03 | asymmetric protein localization                                                    |
| GO:0007475 | 5.75E-03 | apposition of dorsal and ventral imaginal disc-derived wing surfaces               |
| GO:0007399 | 5.75E-03 | nervous system development                                                         |
| GO:0000902 | 5.75E-03 | cell morphogenesis                                                                 |
| GO:0048066 | 5.75E-03 | pigmentation during development                                                    |
| GO:0007525 | 5.75E-03 | somatic muscle development                                                         |
| GO:0045197 | 5.75E-03 | establishment or maintenance of epithelial cell apical/basal polarity              |
| GO:0042048 | 5.87E-03 | olfactory behavior                                                                 |
| GO:0006914 | 5.87E-03 | autophagy                                                                          |
| GO:0035071 | 6.05E-03 | salivary gland cell autophagic cell death                                          |
| GO:0007269 | 6.60E-03 | neurotransmitter secretion                                                         |
| GO:0006813 | 6.78E-03 | potassium ion transport                                                            |
| GO:0008293 | 7.58E-03 | torso signaling pathway                                                            |
| GO:0048813 | 7.58E-03 | dendrite morphogenesis                                                             |
| GO:0007186 | 7.93E-03 | G-protein coupled receptor protein signaling pathway                               |
| GO:0016055 | 8.13E-03 | Wnt receptor signaling pathway                                                     |
| GO:0007455 | 8.84E-03 | eye-antennal disc morphogenesis                                                    |
| GO:0045167 | 8.84E-03 | asymmetric protein localization involved in cell fate determination                |
| GO:0007632 | 8.84E-03 | visual behavior                                                                    |
| GO:0035215 | 8.84E-03 | genital disc development                                                           |
| GO:0010552 | 8.84E-03 | positive regulation of gene-specific transcription from RNA polymerase II promoter |

|            |          |                                                            |
|------------|----------|------------------------------------------------------------|
| GO:0045610 | 8.84E-03 | regulation of hemocyte differentiation                     |
| GO:0007362 | 9.17E-03 | terminal region determination                              |
| GO:0007494 | 1.20E-02 | midgut development                                         |
| GO:0035023 | 1.20E-02 | regulation of Rho protein signal transduction              |
| GO:0016319 | 1.21E-02 | mushroom body development                                  |
| GO:0002168 | 1.31E-02 | instar larval development                                  |
| GO:0008049 | 1.31E-02 | male courtship behavior                                    |
| GO:0051225 | 1.31E-02 | spindle assembly                                           |
| GO:0007431 | 1.31E-02 | salivary gland development                                 |
| GO:0042078 | 1.31E-02 | germ-line stem cell division                               |
| GO:0006812 | 1.38E-02 | cation transport                                           |
| GO:0006897 | 1.38E-02 | endocytosis                                                |
| GO:0030718 | 1.38E-02 | germ-line stem cell maintenance                            |
| GO:0007400 | 1.38E-02 | neuroblast fate determination                              |
| GO:0048542 | 1.38E-02 | lymph gland development                                    |
| GO:0007446 | 1.38E-02 | imaginal disc growth                                       |
| GO:0007306 | 1.38E-02 | eggshell chorion assembly                                  |
| GO:0045186 | 1.40E-02 | zonula adherens assembly                                   |
| GO:0030536 | 1.40E-02 | larval feeding behavior                                    |
| GO:0048800 | 1.40E-02 | antennal morphogenesis                                     |
| GO:0007519 | 1.40E-02 | skeletal muscle tissue development                         |
| GO:0016079 | 1.40E-02 | synaptic vesicle exocytosis                                |
| GO:0007173 | 1.47E-02 | epidermal growth factor receptor signaling pathway         |
| GO:0007291 | 1.52E-02 | sperm individualization                                    |
| GO:0007602 | 1.59E-02 | phototransduction                                          |
| GO:0008360 | 1.70E-02 | regulation of cell shape                                   |
| GO:0007179 | 1.74E-02 | transforming growth factor beta receptor signaling pathway |
| GO:0007426 | 1.74E-02 | tracheal outgrowth, open tracheal system                   |
| GO:0016477 | 1.74E-02 | cell migration                                             |
| GO:0051726 | 1.89E-02 | regulation of cell cycle                                   |
| GO:0008103 | 1.96E-02 | oocyte microtubule cytoskeleton polarization               |
| GO:0035277 | 1.96E-02 | spiracle morphogenesis, open tracheal system               |
| GO:0008286 | 1.96E-02 | insulin receptor signaling pathway                         |
| GO:0007224 | 2.01E-02 | smoothened signaling pathway                               |
| GO:0016318 | 2.01E-02 | ommatidial rotation                                        |
| GO:0030707 | 2.02E-02 | ovarian follicle cell development                          |
| GO:0007517 | 2.04E-02 | muscle organ development                                   |
| GO:0001700 | 2.04E-02 | embryonic development via the syncytial blastoderm         |
| GO:0048102 | 2.04E-02 | autophagic cell death                                      |
| GO:0007315 | 2.08E-02 | pole plasm assembly                                        |
| GO:0007613 | 2.08E-02 | memory                                                     |
| GO:0007293 | 2.08E-02 | germarium-derived egg chamber formation                    |
| GO:0030307 | 2.08E-02 | positive regulation of cell growth                         |
| GO:0042067 | 2.30E-02 | establishment of ommatidial polarity                       |

|            |          |                                                                  |
|------------|----------|------------------------------------------------------------------|
| GO:0007303 | 2.72E-02 | cytoplasmic transport, nurse cell to oocyte                      |
| GO:0019991 | 2.72E-02 | septate junction assembly                                        |
| GO:0007015 | 2.98E-02 | actin filament organization                                      |
| GO:0007528 | 3.04E-02 | neuromuscular junction development                               |
| GO:0007304 | 3.04E-02 | chorion-containing eggshell formation                            |
| GO:0035099 | 3.04E-02 | hemocyte migration                                               |
| GO:0045941 | 3.04E-02 | positive regulation of transcription                             |
| GO:0006325 | 3.04E-02 | chromatin organization                                           |
| GO:0007367 | 3.04E-02 | segment polarity determination                                   |
| GO:0007309 | 3.04E-02 | oocyte axis specification                                        |
| GO:0051056 | 3.04E-02 | regulation of small GTPase mediated signal transduction          |
| GO:0006366 | 3.28E-02 | transcription from RNA polymerase II promoter                    |
| GO:0045893 | 3.28E-02 | positive regulation of transcription, DNA-dependent              |
| GO:0009790 | 3.42E-02 | embryonic development                                            |
| GO:0007409 | 3.50E-02 | axonogenesis                                                     |
| GO:0030097 | 3.53E-02 | hemopoiesis                                                      |
| GO:0017148 | 3.53E-02 | negative regulation of translation                               |
| GO:0007286 | 3.53E-02 | spermatid development                                            |
| GO:0007254 | 3.53E-02 | JNK cascade                                                      |
| GO:0007310 | 3.53E-02 | oocyte dorsal/ventral axis specification                         |
| GO:0055059 | 3.90E-02 | asymmetric neuroblast division                                   |
| GO:0000381 | 3.99E-02 | regulation of alternative nuclear mRNA splicing, via spliceosome |
| GO:0046843 | 4.17E-02 | dorsal appendage formation                                       |
| GO:0040014 | 4.18E-02 | regulation of multicellular organism growth                      |
| GO:0006378 | 4.18E-02 | mRNA polyadenylation                                             |
| GO:0007417 | 4.31E-02 | central nervous system development                               |
| GO:0006470 | 4.32E-02 | protein amino acid dephosphorylation                             |
| GO:0007350 | 4.68E-02 | blastoderm segmentation                                          |

---
