# Supplementary material
Source: PubMed Central journal article supplement (PMC4012493)
Supplement: supp_114.161463_TableS4.pdf [file supp_114.161463_TableS4.pdf]

**Table S4 GO term enrichment for molecular function in the Australian cline for genes that overlap windows in the top 1% tail of  $F_{st}$ .**

| GO term    | 1 % Tail Molecular Function |                                          |
|------------|-----------------------------|------------------------------------------|
|            | q-value                     | description                              |
| GO:0005515 | 1.79E-06                    | protein binding                          |
| GO:0000166 | 9.09E-03                    | nucleotide binding                       |
| GO:0003700 | 1.17E-02                    | transcription factor activity            |
| GO:0004674 | 1.17E-02                    | protein serine/threonine kinase activity |
| GO:0004672 | 1.17E-02                    | protein kinase activity                  |
| GO:0004871 | 1.26E-02                    | signal transducer activity               |
| GO:0043565 | 1.50E-02                    | sequence-specific DNA binding            |
| GO:0004930 | 1.81E-02                    | G-protein coupled receptor activity      |
| GO:0005509 | 3.32E-02                    | calcium ion binding                      |
| GO:0003779 | 3.37E-02                    | actin binding                            |
| GO:0003729 | 3.60E-02                    | mRNA binding                             |
| GO:0042623 | 3.60E-02                    | ATPase activity, coupled                 |
| GO:0005524 | 4.08E-02                    | ATP binding                              |
