# Supplementary material
Source: PubMed Central journal article supplement (PMC4012493)
Supplement: supp_114.161463_TableS5.pdf [file supp_114.161463_TableS5.pdf]

**Table S5 GO term enrichment for molecular function in the Australian cline for genes that overlap windows in the top 2.5% tail of Fst.**

| GO term    | 2.5 % Tail Molecular Function |                                                             |
|------------|-------------------------------|-------------------------------------------------------------|
|            | q-value                       | description                                                 |
| GO:0005515 | 5.44E-10                      | protein binding                                             |
| GO:0003700 | 3.20E-09                      | transcription factor activity                               |
| GO:0004672 | 9.65E-06                      | protein kinase activity                                     |
| GO:0004674 | 3.88E-05                      | protein serine/threonine kinase activity                    |
| GO:0043565 | 3.88E-05                      | sequence-specific DNA binding                               |
| GO:0005509 | 9.56E-05                      | calcium ion binding                                         |
| GO:0008270 | 2.82E-04                      | zinc ion binding                                            |
| GO:0004871 | 6.54E-04                      | signal transducer activity                                  |
| GO:0004702 | 6.54E-04                      | receptor signaling protein serine/threonine kinase activity |
| GO:0004725 | 1.60E-03                      | protein tyrosine phosphatase activity                       |
| GO:0005524 | 1.60E-03                      | ATP binding                                                 |
| GO:0003702 | 1.98E-03                      | RNA polymerase II transcription factor activity             |
| GO:0005089 | 2.78E-03                      | Rho guanyl-nucleotide exchange factor activity              |
| GO:0004714 | 3.11E-03                      | transmembrane receptor protein tyrosine kinase activity     |
| GO:0003676 | 4.02E-03                      | nucleic acid binding                                        |
| GO:0008188 | 4.02E-03                      | neuropeptide receptor activity                              |
| GO:0005096 | 4.02E-03                      | GTPase activator activity                                   |
| GO:0005102 | 4.13E-03                      | receptor binding                                            |
| GO:0008026 | 5.10E-03                      | ATP-dependent helicase activity                             |
| GO:0003713 | 5.26E-03                      | transcription coactivator activity                          |
| GO:0005249 | 5.58E-03                      | voltage-gated potassium channel activity                    |
| GO:0004713 | 8.82E-03                      | protein tyrosine kinase activity                            |
| GO:0004930 | 8.82E-03                      | G-protein coupled receptor activity                         |
| GO:0003704 | 8.82E-03                      | specific RNA polymerase II transcription factor activity    |
| GO:0016563 | 1.37E-02                      | transcription activator activity                            |
| GO:0004872 | 1.37E-02                      | receptor activity                                           |
| GO:0003779 | 1.37E-02                      | actin binding                                               |
| GO:0000166 | 1.39E-02                      | nucleotide binding                                          |
| GO:0016566 | 1.42E-02                      | specific transcriptional repressor activity                 |
| GO:0008236 | 1.47E-02                      | serine-type peptidase activity                              |
| GO:0004222 | 1.60E-02                      | metalloendopeptidase activity                               |
| GO:0042803 | 1.68E-02                      | protein homodimerization activity                           |
| GO:0008083 | 1.81E-02                      | growth factor activity                                      |
| GO:0019992 | 2.47E-02                      | diacylglycerol binding                                      |
| GO:0004888 | 2.47E-02                      | transmembrane receptor activity                             |
| GO:0005516 | 3.85E-02                      | calmodulin binding                                          |
| GO:0008017 | 4.56E-02                      | microtubule binding                                         |
| GO:0046983 | 4.56E-02                      | protein dimerization activity                               |
| GO:0003729 | 4.85E-02                      | mRNA binding                                                |
