# Supplementary material
Source: PubMed Central journal article supplement (PMC4012493)
Supplement: supp_114.161463_TableS6.pdf [file supp_114.161463_TableS6.pdf]

**Table S6 GO term enrichment for molecular function in the Australian cline for genes that overlap windows in the top 5% tail of Fst.**

| GO term    | 5 % Tail Molecular Function |                                                                     |
|------------|-----------------------------|---------------------------------------------------------------------|
|            | q-value                     | description                                                         |
| GO:0003700 | 3.39E-14                    | transcription factor activity                                       |
| GO:0005515 | 1.99E-13                    | protein binding                                                     |
| GO:0005524 | 8.48E-09                    | ATP binding                                                         |
| GO:0043565 | 3.00E-07                    | sequence-specific DNA binding                                       |
| GO:0005509 | 3.00E-07                    | calcium ion binding                                                 |
| GO:0004672 | 1.97E-06                    | protein kinase activity                                             |
| GO:0004674 | 2.91E-06                    | protein serine/threonine kinase activity                            |
| GO:0008188 | 7.43E-05                    | neuropeptide receptor activity                                      |
| GO:0008270 | 1.12E-04                    | zinc ion binding                                                    |
| GO:0003702 | 2.61E-04                    | RNA polymerase II transcription factor activity                     |
| GO:0003779 | 6.72E-04                    | actin binding                                                       |
| GO:0004871 | 9.13E-04                    | signal transducer activity                                          |
| GO:0005245 | 1.64E-03                    | voltage-gated calcium channel activity                              |
| GO:0005096 | 1.64E-03                    | GTPase activator activity                                           |
| GO:0004702 | 1.67E-03                    | receptor signaling protein serine/threonine kinase activity         |
| GO:0004725 | 2.56E-03                    | protein tyrosine phosphatase activity                               |
| GO:0004889 | 3.99E-03                    | nicotinic acetylcholine-activated cation-selective channel activity |
| GO:0032027 | 3.99E-03                    | myosin light chain binding                                          |
| GO:0003774 | 4.34E-03                    | motor activity                                                      |
| GO:0003707 | 5.47E-03                    | steroid hormone receptor activity                                   |
| GO:0005249 | 6.08E-03                    | voltage-gated potassium channel activity                            |
| GO:0004386 | 9.04E-03                    | helicase activity                                                   |
| GO:0004190 | 9.04E-03                    | aspartic-type endopeptidase activity                                |
| GO:0003777 | 9.04E-03                    | microtubule motor activity                                          |
| GO:0008026 | 9.04E-03                    | ATP-dependent helicase activity                                     |
| GO:0005102 | 1.01E-02                    | receptor binding                                                    |
| GO:0004222 | 1.01E-02                    | metalloendopeptidase activity                                       |
| GO:0003676 | 1.16E-02                    | nucleic acid binding                                                |
| GO:0004872 | 1.25E-02                    | receptor activity                                                   |
| GO:0003704 | 1.25E-02                    | specific RNA polymerase II transcription factor activity            |
| GO:0003713 | 1.47E-02                    | transcription coactivator activity                                  |
| GO:0005089 | 1.57E-02                    | Rho guanyl-nucleotide exchange factor activity                      |
| GO:0004888 | 1.57E-02                    | transmembrane receptor activity                                     |
| GO:0019992 | 1.57E-02                    | diacylglycerol binding                                              |
| GO:0000166 | 1.79E-02                    | nucleotide binding                                                  |
| GO:0008239 | 1.82E-02                    | dipeptidyl-peptidase activity                                       |
| GO:0004879 | 1.82E-02                    | ligand-dependent nuclear receptor activity                          |
| GO:0042626 | 1.82E-02                    | ATPase activity, coupled to transmembrane movement of substances    |
| GO:0003746 | 1.82E-02                    | translation elongation factor activity                              |
| GO:0016566 | 1.87E-02                    | specific transcriptional repressor activity                         |

|            |          |                                                         |
|------------|----------|---------------------------------------------------------|
| GO:0004930 | 2.17E-02 | G-protein coupled receptor activity                     |
| GO:0005085 | 2.17E-02 | guanyl-nucleotide exchange factor activity              |
| GO:0017111 | 2.55E-02 | nucleoside-triphosphatase activity                      |
| GO:0004714 | 2.55E-02 | transmembrane receptor protein tyrosine kinase activity |
| GO:0005516 | 2.55E-02 | calmodulin binding                                      |
| GO:0003677 | 2.55E-02 | DNA binding                                             |
| GO:0005215 | 2.55E-02 | transporter activity                                    |
| GO:0008017 | 2.97E-02 | microtubule binding                                     |
| GO:0042623 | 3.27E-02 | ATPase activity, coupled                                |
| GO:0016563 | 3.55E-02 | transcription activator activity                        |
| GO:0050839 | 3.62E-02 | cell adhesion molecule binding                          |
| GO:0035091 | 3.62E-02 | phosphoinositide binding                                |
| GO:0008083 | 3.86E-02 | growth factor activity                                  |
| GO:0004713 | 4.10E-02 | protein tyrosine kinase activity                        |
| GO:0003714 | 4.16E-02 | transcription corepressor activity                      |
| GO:0032183 | 4.36E-02 | SUMO binding                                            |

---
