# Supplementary material
Source: PubMed Central journal article supplement (PMC4012493)
Supplement: supp_114.161463_TableS7.pdf [file supp_114.161463_TableS7.pdf]

**Table S7 GO term enrichment for cellular component in the Australian cline for genes that overlap windows in the top 1% tail of Fst.**

| GO term    | 1 % Tail Cellular Component |                                    |
|------------|-----------------------------|------------------------------------|
|            | q-value                     | description                        |
| GO:0005886 | 1.97E-06                    | plasma membrane                    |
| GO:0045211 | 2.47E-04                    | postsynaptic membrane              |
| GO:0042600 | 6.03E-04                    | chorion                            |
| GO:0005887 | 6.03E-04                    | integral to plasma membrane        |
| GO:0005578 | 2.51E-03                    | proteinaceous extracellular matrix |
| GO:0043234 | 2.51E-03                    | protein complex                    |
| GO:0016020 | 2.51E-03                    | membrane                           |
| GO:0005622 | 1.45E-02                    | intracellular                      |
| GO:0005634 | 2.82E-02                    | nucleus                            |
| GO:0016021 | 3.70E-02                    | integral to membrane               |
| GO:0005875 | 3.70E-02                    | microtubule associated complex     |
