# Supplementary material
Source: PubMed Central journal article supplement (PMC4012493)
Supplement: supp_114.161463_TableS8.pdf [file supp_114.161463_TableS8.pdf]

**Table S8 GO term enrichment for cellular component in the Australian cline for genes that overlap windows in the top 2.5% tail of Fst.**

| 2.5 % Tail Cellular Component |          |                                         |
|-------------------------------|----------|-----------------------------------------|
| GO term                       | q-value  | description                             |
| GO:0005886                    | 2.11E-13 | plasma membrane                         |
| GO:0005634                    | 1.38E-06 | nucleus                                 |
| GO:0005887                    | 5.67E-05 | integral to plasma membrane             |
| GO:0005918                    | 1.44E-04 | septate junction                        |
| GO:0045211                    | 9.38E-04 | postsynaptic membrane                   |
| GO:0005912                    | 1.42E-03 | adherens junction                       |
| GO:0035003                    | 1.42E-03 | subapical complex                       |
| GO:0016327                    | 1.42E-03 | apicolateral plasma membrane            |
| GO:0016324                    | 1.42E-03 | apical plasma membrane                  |
| GO:0045202                    | 2.26E-03 | synapse                                 |
| GO:0016021                    | 2.37E-03 | integral to membrane                    |
| GO:0008076                    | 3.27E-03 | voltage-gated potassium channel complex |
| GO:0016459                    | 5.74E-03 | myosin complex                          |
| GO:0008021                    | 6.02E-03 | synaptic vesicle                        |
| GO:0045179                    | 8.90E-03 | apical cortex                           |
| GO:0043234                    | 8.90E-03 | protein complex                         |
| GO:0005667                    | 1.15E-02 | transcription factor complex            |
| GO:0042600                    | 1.48E-02 | chorion                                 |
| GO:0005622                    | 1.68E-02 | intracellular                           |
| GO:0016020                    | 1.76E-02 | membrane                                |
| GO:0005578                    | 1.92E-02 | proteinaceous extracellular matrix      |
| GO:0005739                    | 2.91E-02 | mitochondrion                           |
| GO:0005875                    | 3.68E-02 | microtubule associated complex          |
| GO:0005938                    | 4.85E-02 | cell cortex                             |
