# Supplementary material
Source: PubMed Central journal article supplement (PMC4012493)
Supplement: supp_114.161463_TableS9.pdf [file supp_114.161463_TableS9.pdf]

**Table S9 GO term enrichment for cellular component in the Australian cline for genes that overlap windows in the top 5% tail of Fst.**

| 5 % Tail Cellular Component |          |                                                        |
|-----------------------------|----------|--------------------------------------------------------|
| GO term                     | q-value  | description                                            |
| GO:0005886                  | 1.98E-14 | plasma membrane                                        |
| GO:0005634                  | 4.17E-11 | nucleus                                                |
| GO:0005887                  | 2.97E-08 | integral to plasma membrane                            |
| GO:0016021                  | 2.72E-06 | integral to membrane                                   |
| GO:0016324                  | 2.27E-04 | apical plasma membrane                                 |
| GO:0005913                  | 3.46E-04 | cell-cell adherens junction                            |
| GO:0045211                  | 6.54E-04 | postsynaptic membrane                                  |
| GO:0035003                  | 8.56E-04 | subapical complex                                      |
| GO:0005912                  | 8.62E-04 | adherens junction                                      |
| GO:0005918                  | 1.31E-03 | septate junction                                       |
| GO:0005737                  | 1.76E-03 | cytoplasm                                              |
| GO:0045179                  | 2.09E-03 | apical cortex                                          |
| GO:0005892                  | 2.41E-03 | nicotinic acetylcholine-gated receptor-channel complex |
| GO:0043195                  | 2.41E-03 | terminal button                                        |
| GO:0016459                  | 2.41E-03 | myosin complex                                         |
| GO:0005622                  | 2.41E-03 | intracellular                                          |
| GO:0045202                  | 2.41E-03 | synapse                                                |
| GO:0016323                  | 2.41E-03 | basolateral plasma membrane                            |
| GO:0008076                  | 2.41E-03 | voltage-gated potassium channel complex                |
| GO:0016327                  | 3.14E-03 | apicolateral plasma membrane                           |
| GO:0005875                  | 3.83E-03 | microtubule associated complex                         |
| GO:0016020                  | 4.18E-03 | membrane                                               |
| GO:0009986                  | 4.52E-03 | cell surface                                           |
| GO:0008021                  | 5.40E-03 | synaptic vesicle                                       |
| GO:0005578                  | 6.13E-03 | proteinaceous extracellular matrix                     |
| GO:0005604                  | 8.43E-03 | basement membrane                                      |
| GO:0005938                  | 8.74E-03 | cell cortex                                            |
| GO:0043190                  | 1.26E-02 | ATP-binding cassette (ABC) transporter complex         |
| GO:0043025                  | 1.36E-02 | cell soma                                              |
| GO:0005705                  | 1.36E-02 | polytene chromosome interband                          |
| GO:0030425                  | 3.37E-02 | dendrite                                               |
| GO:0015629                  | 3.37E-02 | actin cytoskeleton                                     |
| GO:0005667                  | 3.98E-02 | transcription factor complex                           |
