# Supplementary material
Source: PubMed Central journal article supplement (PMC4012493)
Supplement: supp_114.161463_TableS10.pdf [file supp_114.161463_TableS10.pdf]

**Table S10 GO term enrichment for biological process in the North American cline for genes that overlap windows in the top 1% tail of Fst.**

| 1 % Tail Biological Process |          |                                                      |
|-----------------------------|----------|------------------------------------------------------|
| GO term                     | q-value  | description                                          |
| GO:0007411                  | 8.92E-06 | axon guidance                                        |
| GO:0006355                  | 8.92E-06 | regulation of transcription, DNA-dependent           |
| GO:0007455                  | 1.28E-04 | eye-antennal disc morphogenesis                      |
| GO:0048749                  | 1.30E-04 | compound eye development                             |
| GO:0007165                  | 1.54E-04 | signal transduction                                  |
| GO:0007155                  | 2.44E-04 | cell adhesion                                        |
| GO:0007476                  | 2.44E-04 | imaginal disc-derived wing morphogenesis             |
| GO:0007424                  | 2.78E-04 | open tracheal system development                     |
| GO:0007611                  | 3.13E-04 | learning or memory                                   |
| GO:0030707                  | 4.18E-04 | ovarian follicle cell development                    |
| GO:0035317                  | 4.18E-04 | imaginal disc-derived wing hair organization         |
| GO:0007530                  | 4.18E-04 | sex determination                                    |
| GO:0007156                  | 4.60E-04 | homophilic cell adhesion                             |
| GO:0007422                  | 5.26E-04 | peripheral nervous system development                |
| GO:0007350                  | 7.08E-04 | blastoderm segmentation                              |
| GO:0006811                  | 1.16E-03 | ion transport                                        |
| GO:0006468                  | 1.25E-03 | protein amino acid phosphorylation                   |
| GO:0008355                  | 1.77E-03 | olfactory learning                                   |
| GO:0006350                  | 1.80E-03 | transcription                                        |
| GO:0016310                  | 1.80E-03 | phosphorylation                                      |
| GO:0008104                  | 1.82E-03 | protein localization                                 |
| GO:0006813                  | 2.37E-03 | potassium ion transport                              |
| GO:0007391                  | 2.37E-03 | dorsal closure                                       |
| GO:0008407                  | 2.75E-03 | bristle morphogenesis                                |
| GO:0007623                  | 2.85E-03 | circadian rhythm                                     |
| GO:0007420                  | 2.85E-03 | brain development                                    |
| GO:0007186                  | 3.70E-03 | G-protein coupled receptor protein signaling pathway |
| GO:0007399                  | 3.70E-03 | nervous system development                           |
| GO:0045449                  | 4.03E-03 | regulation of transcription                          |
| GO:0048477                  | 4.67E-03 | oogenesis                                            |
| GO:0048813                  | 6.08E-03 | dendrite morphogenesis                               |
| GO:0007242                  | 8.01E-03 | intracellular signaling cascade                      |
| GO:0008360                  | 8.37E-03 | regulation of cell shape                             |
| GO:0002121                  | 8.37E-03 | inter-male aggressive behavior                       |
| GO:0007417                  | 9.30E-03 | central nervous system development                   |
| GO:0007507                  | 1.13E-02 | heart development                                    |
| GO:0007017                  | 1.75E-02 | microtubule-based process                            |
| GO:0006470                  | 2.98E-02 | protein amino acid dephosphorylation                 |
