# Supplementary material
Source: PubMed Central journal article supplement (PMC4012493)
Supplement: supp_114.161463_TableS11.pdf [file supp_114.161463_TableS11.pdf]

**Table S11 GO term enrichment for biological process in the North American cline for genes that overlap windows in the top 2.5% tail of Fst.**

| 2.5 % Tail Biological Process |          |                                                      |
|-------------------------------|----------|------------------------------------------------------|
| GO term                       | q-value  | description                                          |
| GO:0007476                    | 1.63E-07 | imaginal disc-derived wing morphogenesis             |
| GO:0048749                    | 1.63E-07 | compound eye development                             |
| GO:0006355                    | 1.63E-07 | regulation of transcription, DNA-dependent           |
| GO:0007411                    | 3.96E-07 | axon guidance                                        |
| GO:0007350                    | 1.62E-06 | blastoderm segmentation                              |
| GO:0007155                    | 4.43E-06 | cell adhesion                                        |
| GO:0007513                    | 5.83E-06 | pericardial cell differentiation                     |
| GO:0045449                    | 8.22E-06 | regulation of transcription                          |
| GO:0016203                    | 1.10E-05 | muscle attachment                                    |
| GO:0007435                    | 1.10E-05 | salivary gland morphogenesis                         |
| GO:0007424                    | 1.55E-05 | open tracheal system development                     |
| GO:0006468                    | 2.18E-05 | protein amino acid phosphorylation                   |
| GO:0007156                    | 2.62E-05 | homophilic cell adhesion                             |
| GO:0007611                    | 3.07E-05 | learning or memory                                   |
| GO:0035023                    | 3.11E-05 | regulation of Rho protein signal transduction        |
| GO:0048477                    | 8.61E-05 | oogenesis                                            |
| GO:0008355                    | 8.63E-05 | olfactory learning                                   |
| GO:0007472                    | 9.07E-05 | wing disc morphogenesis                              |
| GO:0007399                    | 9.14E-05 | nervous system development                           |
| GO:0007242                    | 1.17E-04 | intracellular signaling cascade                      |
| GO:0007614                    | 1.17E-04 | short-term memory                                    |
| GO:0007619                    | 1.86E-04 | courtship behavior                                   |
| GO:0007165                    | 2.23E-04 | signal transduction                                  |
| GO:0030097                    | 2.46E-04 | hemopoiesis                                          |
| GO:0007268                    | 2.87E-04 | synaptic transmission                                |
| GO:0048800                    | 3.69E-04 | antennal morphogenesis                               |
| GO:0016318                    | 4.06E-04 | ommatidial rotation                                  |
| GO:0008360                    | 4.06E-04 | regulation of cell shape                             |
| GO:0007417                    | 4.06E-04 | central nervous system development                   |
| GO:0016055                    | 4.70E-04 | Wnt receptor signaling pathway                       |
| GO:0007507                    | 4.82E-04 | heart development                                    |
| GO:0035277                    | 4.82E-04 | spiracle morphogenesis, open tracheal system         |
| GO:0007474                    | 5.54E-04 | imaginal disc-derived wing vein specification        |
| GO:0007186                    | 5.87E-04 | G-protein coupled receptor protein signaling pathway |
| GO:0007617                    | 6.47E-04 | mating behavior                                      |
| GO:0035172                    | 6.47E-04 | hemocyte proliferation                               |
| GO:0035225                    | 6.47E-04 | determination of genital disc primordium             |
| GO:0007455                    | 7.31E-04 | eye-antennal disc morphogenesis                      |
| GO:0008407                    | 7.66E-04 | bristle morphogenesis                                |
| GO:0007428                    | 1.01E-03 | primary branching, open tracheal system              |

|            |          |                                                                      |
|------------|----------|----------------------------------------------------------------------|
| GO:0007420 | 1.03E-03 | brain development                                                    |
| GO:0006811 | 1.05E-03 | ion transport                                                        |
| GO:0008104 | 1.05E-03 | protein localization                                                 |
| GO:0008356 | 1.07E-03 | asymmetric cell division                                             |
| GO:0007391 | 1.12E-03 | dorsal closure                                                       |
| GO:0045433 | 1.15E-03 | male courtship behavior, veined wing generated song production       |
| GO:0007632 | 1.15E-03 | visual behavior                                                      |
| GO:0001745 | 1.22E-03 | compound eye morphogenesis                                           |
| GO:0008586 | 1.25E-03 | imaginal disc-derived wing vein morphogenesis                        |
| GO:0007400 | 1.43E-03 | neuroblast fate determination                                        |
| GO:0040014 | 1.43E-03 | regulation of multicellular organism growth                          |
| GO:0016477 | 1.47E-03 | cell migration                                                       |
| GO:0007422 | 1.57E-03 | peripheral nervous system development                                |
| GO:0006813 | 1.80E-03 | potassium ion transport                                              |
| GO:0030707 | 1.83E-03 | ovarian follicle cell development                                    |
| GO:0045475 | 1.85E-03 | locomotor rhythm                                                     |
| GO:0040018 | 1.85E-03 | positive regulation of multicellular organism growth                 |
| GO:0048675 | 1.85E-03 | axon extension                                                       |
| GO:0007173 | 1.99E-03 | epidermal growth factor receptor signaling pathway                   |
| GO:0045165 | 1.99E-03 | cell fate commitment                                                 |
| GO:0008286 | 1.99E-03 | insulin receptor signaling pathway                                   |
| GO:0030162 | 1.99E-03 | regulation of proteolysis                                            |
| GO:0007498 | 2.01E-03 | mesoderm development                                                 |
| GO:0007017 | 2.07E-03 | microtubule-based process                                            |
| GO:0008105 | 2.68E-03 | asymmetric protein localization                                      |
| GO:0007442 | 2.68E-03 | hindgut morphogenesis                                                |
| GO:0007475 | 2.68E-03 | apposition of dorsal and ventral imaginal disc-derived wing surfaces |
| GO:0006916 | 2.68E-03 | anti-apoptosis                                                       |
| GO:0007443 | 2.68E-03 | Malpighian tubule morphogenesis                                      |
| GO:0030307 | 2.68E-03 | positive regulation of cell growth                                   |
| GO:0035317 | 2.68E-03 | imaginal disc-derived wing hair organization                         |
| GO:0048149 | 2.68E-03 | behavioral response to ethanol                                       |
| GO:0006816 | 2.68E-03 | calcium ion transport                                                |
| GO:0008345 | 2.68E-03 | larval locomotory behavior                                           |
| GO:0007623 | 2.82E-03 | circadian rhythm                                                     |
| GO:0001737 | 3.83E-03 | establishment of imaginal disc-derived wing hair orientation         |
| GO:0002168 | 3.83E-03 | instar larval development                                            |
| GO:0016199 | 3.83E-03 | axon midline choice point recognition                                |
| GO:0030713 | 3.83E-03 | ovarian follicle cell stalk formation                                |
| GO:0007369 | 3.83E-03 | gastrulation                                                         |
| GO:0008049 | 3.83E-03 | male courtship behavior                                              |
| GO:0007431 | 3.83E-03 | salivary gland development                                           |
| GO:0042051 | 3.83E-03 | compound eye photoreceptor development                               |
| GO:0007629 | 3.83E-03 | flight behavior                                                      |

|            |          |                                                                      |
|------------|----------|----------------------------------------------------------------------|
| GO:0007528 | 3.83E-03 | neuromuscular junction development                                   |
| GO:0008045 | 4.17E-03 | motor axon guidance                                                  |
| GO:0007419 | 4.17E-03 | ventral cord development                                             |
| GO:0007427 | 4.17E-03 | epithelial cell migration, open tracheal system                      |
| GO:0007269 | 5.13E-03 | neurotransmitter secretion                                           |
| GO:0007446 | 5.54E-03 | imaginal disc growth                                                 |
| GO:0051017 | 5.54E-03 | actin filament bundle formation                                      |
| GO:0007416 | 5.54E-03 | synapse assembly                                                     |
| GO:0001736 | 5.54E-03 | establishment of planar polarity                                     |
| GO:0007298 | 6.19E-03 | border follicle cell migration                                       |
| GO:0007140 | 6.53E-03 | male meiosis                                                         |
| GO:0042067 | 6.53E-03 | establishment of ommatidial polarity                                 |
| GO:0030178 | 6.53E-03 | negative regulation of Wnt receptor signaling pathway                |
| GO:0007398 | 6.53E-03 | ectoderm development                                                 |
| GO:0045893 | 6.86E-03 | positive regulation of transcription, DNA-dependent                  |
| GO:0007349 | 6.86E-03 | cellularization                                                      |
| GO:0001709 | 7.60E-03 | cell fate determination                                              |
| GO:0008344 | 7.60E-03 | adult locomotory behavior                                            |
| GO:0048190 | 7.89E-03 | wing disc dorsal/ventral pattern formation                           |
| GO:0007494 | 8.46E-03 | midgut development                                                   |
| GO:0007520 | 8.46E-03 | myoblast fusion                                                      |
| GO:0001700 | 8.54E-03 | embryonic development via the syncytial blastoderm                   |
| GO:0007530 | 9.93E-03 | sex determination                                                    |
| GO:0001708 | 9.93E-03 | cell fate specification                                              |
| GO:0002121 | 9.93E-03 | inter-male aggressive behavior                                       |
| GO:0007390 | 9.93E-03 | germ-band shortening                                                 |
| GO:0051276 | 9.93E-03 | chromosome organization                                              |
| GO:0000226 | 9.93E-03 | microtubule cytoskeleton organization                                |
| GO:0019991 | 9.93E-03 | septate junction assembly                                            |
| GO:0055059 | 1.06E-02 | asymmetric neuroblast division                                       |
| GO:0007015 | 1.16E-02 | actin filament organization                                          |
| GO:0007517 | 1.19E-02 | muscle organ development                                             |
| GO:0007602 | 1.19E-02 | phototransduction                                                    |
| GO:0045944 | 1.28E-02 | positive regulation of transcription from RNA polymerase II promoter |
| GO:0007224 | 1.31E-02 | smoothened signaling pathway                                         |
| GO:0007317 | 1.31E-02 | regulation of pole plasm oskar mRNA localization                     |
| GO:0016310 | 1.31E-02 | phosphorylation                                                      |
| GO:0007274 | 1.31E-02 | neuromuscular synaptic transmission                                  |
| GO:0007163 | 1.68E-02 | establishment or maintenance of cell polarity                        |
| GO:0007480 | 1.72E-02 | imaginal disc-derived leg morphogenesis                              |
| GO:0006915 | 2.03E-02 | apoptosis                                                            |
| GO:0030036 | 2.03E-02 | actin cytoskeleton organization                                      |
| GO:0006357 | 2.05E-02 | regulation of transcription from RNA polymerase II promoter          |
| GO:0030718 | 2.05E-02 | germ-line stem cell maintenance                                      |

|            |          |                                                  |
|------------|----------|--------------------------------------------------|
| GO:0008595 | 2.05E-02 | determination of anterior/posterior axis, embryo |
| GO:0001751 | 2.13E-02 | compound eye photoreceptor cell differentiation  |
| GO:0007346 | 2.13E-02 | regulation of mitotic cell cycle                 |
| GO:0040007 | 2.13E-02 | growth                                           |
| GO:0006350 | 2.20E-02 | transcription                                    |
| GO:0006470 | 2.33E-02 | protein amino acid dephosphorylation             |
| GO:0007444 | 2.44E-02 | imaginal disc development                        |
| GO:0008340 | 2.44E-02 | determination of adult lifespan                  |
| GO:0002009 | 2.66E-02 | morphogenesis of an epithelium                   |
| GO:0048813 | 3.11E-02 | dendrite morphogenesis                           |
| GO:0006911 | 3.11E-02 | phagocytosis, engulfment                         |
| GO:0006836 | 3.30E-02 | neurotransmitter transport                       |
| GO:0008298 | 4.08E-02 | intracellular mRNA localization                  |
| GO:0016321 | 4.24E-02 | female meiosis chromosome segregation            |
| GO:0016567 | 4.99E-02 | protein ubiquitination                           |
| GO:0046843 | 4.99E-02 | dorsal appendage formation                       |

---
