# Supplementary material
Source: PubMed Central journal article supplement (PMC4012493)
Supplement: supp_114.161463_TableS12.pdf [file supp_114.161463_TableS12.pdf]

**Table S12 GO term enrichment for biological process in the North American cline for genes that overlap windows in the top 5% tail of Fst.**

| 5 % Tail Biological Process |          |                                                   |
|-----------------------------|----------|---------------------------------------------------|
| GO term                     | q-value  | description                                       |
| GO:0006355                  | 1.48E-08 | regulation of transcription, DNA-dependent        |
| GO:0007411                  | 2.10E-08 | axon guidance                                     |
| GO:0007476                  | 1.13E-07 | imaginal disc-derived wing morphogenesis          |
| GO:0048477                  | 1.13E-07 | oogenesis                                         |
| GO:0035023                  | 4.71E-07 | regulation of Rho protein signal transduction     |
| GO:0048749                  | 9.49E-07 | compound eye development                          |
| GO:0007350                  | 5.78E-06 | blastoderm segmentation                           |
| GO:0007399                  | 5.78E-06 | nervous system development                        |
| GO:0007513                  | 1.22E-05 | pericardial cell differentiation                  |
| GO:0045449                  | 1.99E-05 | regulation of transcription                       |
| GO:0007156                  | 4.21E-05 | homophilic cell adhesion                          |
| GO:0006468                  | 4.21E-05 | protein amino acid phosphorylation                |
| GO:0007474                  | 4.21E-05 | imaginal disc-derived wing vein specification     |
| GO:0007482                  | 4.21E-05 | haltere development                               |
| GO:0007455                  | 4.38E-05 | eye-antennal disc morphogenesis                   |
| GO:0007435                  | 4.75E-05 | salivary gland morphogenesis                      |
| GO:0008586                  | 4.75E-05 | imaginal disc-derived wing vein morphogenesis     |
| GO:0007472                  | 5.30E-05 | wing disc morphogenesis                           |
| GO:0007155                  | 5.88E-05 | cell adhesion                                     |
| GO:0007398                  | 6.34E-05 | ectoderm development                              |
| GO:0042051                  | 8.75E-05 | compound eye photoreceptor development            |
| GO:0007419                  | 8.76E-05 | ventral cord development                          |
| GO:0007391                  | 9.25E-05 | dorsal closure                                    |
| GO:0001745                  | 9.25E-05 | compound eye morphogenesis                        |
| GO:0007424                  | 9.42E-05 | open tracheal system development                  |
| GO:0010002                  | 1.14E-04 | cardioblast differentiation                       |
| GO:0048800                  | 1.46E-04 | antennal morphogenesis                            |
| GO:0035225                  | 1.46E-04 | determination of genital disc primordium          |
| GO:0016203                  | 1.46E-04 | muscle attachment                                 |
| GO:0007480                  | 1.46E-04 | imaginal disc-derived leg morphogenesis           |
| GO:0035172                  | 1.46E-04 | hemocyte proliferation                            |
| GO:0006813                  | 1.85E-04 | potassium ion transport                           |
| GO:0007417                  | 1.96E-04 | central nervous system development                |
| GO:0051276                  | 2.00E-04 | chromosome organization                           |
| GO:0007507                  | 2.44E-04 | heart development                                 |
| GO:0007400                  | 2.66E-04 | neuroblast fate determination                     |
| GO:0007416                  | 2.66E-04 | synapse assembly                                  |
| GO:0046331                  | 3.30E-04 | lateral inhibition                                |
| GO:0035286                  | 3.30E-04 | leg segmentation                                  |
| GO:0035224                  | 3.30E-04 | genital disc anterior/posterior pattern formation |

|            |          |                                                            |
|------------|----------|------------------------------------------------------------|
| GO:0008356 | 3.30E-04 | asymmetric cell division                                   |
| GO:0046667 | 3.30E-04 | compound eye retinal cell programmed cell death            |
| GO:0008406 | 3.30E-04 | gonad development                                          |
| GO:0007425 | 3.30E-04 | epithelial cell fate determination, open tracheal system   |
| GO:0035309 | 3.30E-04 | wing and notum subfield formation                          |
| GO:0007628 | 3.30E-04 | adult walking behavior                                     |
| GO:0007473 | 3.30E-04 | wing disc proximal/distal pattern formation                |
| GO:0030097 | 3.30E-04 | hemopoiesis                                                |
| GO:0007440 | 3.53E-04 | foregut morphogenesis                                      |
| GO:0035215 | 3.53E-04 | genital disc development                                   |
| GO:0007422 | 3.73E-04 | peripheral nervous system development                      |
| GO:0035088 | 3.79E-04 | establishment or maintenance of apical/basal cell polarity |
| GO:0007165 | 5.86E-04 | signal transduction                                        |
| GO:0016477 | 6.23E-04 | cell migration                                             |
| GO:0007498 | 6.67E-04 | mesoderm development                                       |
| GO:0008104 | 6.73E-04 | protein localization                                       |
| GO:0008407 | 7.59E-04 | bristle morphogenesis                                      |
| GO:0045893 | 7.59E-04 | positive regulation of transcription, DNA-dependent        |
| GO:0007479 | 8.97E-04 | leg disc proximal/distal pattern formation                 |
| GO:0007442 | 8.97E-04 | hindgut morphogenesis                                      |
| GO:0007298 | 9.07E-04 | border follicle cell migration                             |
| GO:0016055 | 9.07E-04 | Wnt receptor signaling pathway                             |
| GO:0030162 | 1.05E-03 | regulation of proteolysis                                  |
| GO:0048100 | 1.08E-03 | wing disc anterior/posterior pattern formation             |
| GO:0042048 | 1.08E-03 | olfactory behavior                                         |
| GO:0008284 | 1.08E-03 | positive regulation of cell proliferation                  |
| GO:0048813 | 1.08E-03 | dendrite morphogenesis                                     |
| GO:0007268 | 1.08E-03 | synaptic transmission                                      |
| GO:0007420 | 1.08E-03 | brain development                                          |
| GO:0008045 | 1.08E-03 | motor axon guidance                                        |
| GO:0007076 | 1.20E-03 | mitotic chromosome condensation                            |
| GO:0007415 | 1.23E-03 | defasciculation of motor neuron axon                       |
| GO:0007614 | 1.23E-03 | short-term memory                                          |
| GO:0008355 | 1.24E-03 | olfactory learning                                         |
| GO:0048190 | 1.36E-03 | wing disc dorsal/ventral pattern formation                 |
| GO:0007186 | 1.39E-03 | G-protein coupled receptor protein signaling pathway       |
| GO:0008049 | 1.39E-03 | male courtship behavior                                    |
| GO:0007431 | 1.39E-03 | salivary gland development                                 |
| GO:0007494 | 1.49E-03 | midgut development                                         |
| GO:0046843 | 1.49E-03 | dorsal appendage formation                                 |
| GO:0007619 | 1.49E-03 | courtship behavior                                         |
| GO:0050770 | 1.61E-03 | regulation of axonogenesis                                 |
| GO:0030307 | 1.61E-03 | positive regulation of cell growth                         |
| GO:0008360 | 1.86E-03 | regulation of cell shape                                   |

|            |          |                                                                                    |
|------------|----------|------------------------------------------------------------------------------------|
| GO:0001709 | 2.03E-03 | cell fate determination                                                            |
| GO:0035277 | 2.03E-03 | spiracle morphogenesis, open tracheal system                                       |
| GO:0045165 | 2.03E-03 | cell fate commitment                                                               |
| GO:0042052 | 2.13E-03 | rhabdomere development                                                             |
| GO:0048854 | 2.13E-03 | brain morphogenesis                                                                |
| GO:0001964 | 2.13E-03 | startle response                                                                   |
| GO:0045494 | 2.13E-03 | photoreceptor cell maintenance                                                     |
| GO:0045433 | 2.13E-03 | male courtship behavior, veined wing generated song production                     |
| GO:0009952 | 2.13E-03 | anterior/posterior pattern formation                                               |
| GO:0010552 | 2.13E-03 | positive regulation of gene-specific transcription from RNA polymerase II promoter |
| GO:0045167 | 2.13E-03 | asymmetric protein localization involved in cell fate determination                |
| GO:0031987 | 2.13E-03 | locomotion involved in locomotory behavior                                         |
| GO:0008354 | 2.14E-03 | germ cell migration                                                                |
| GO:0055059 | 2.14E-03 | asymmetric neuroblast division                                                     |
| GO:0030707 | 2.20E-03 | ovarian follicle cell development                                                  |
| GO:0030713 | 2.86E-03 | ovarian follicle cell stalk formation                                              |
| GO:0016199 | 2.86E-03 | axon midline choice point recognition                                              |
| GO:0040001 | 2.88E-03 | establishment of mitotic spindle localization                                      |
| GO:0007051 | 2.88E-03 | spindle organization                                                               |
| GO:0016331 | 2.88E-03 | morphogenesis of embryonic epithelium                                              |
| GO:0007242 | 2.97E-03 | intracellular signaling cascade                                                    |
| GO:0006816 | 3.07E-03 | calcium ion transport                                                              |
| GO:0048149 | 3.07E-03 | behavioral response to ethanol                                                     |
| GO:0006916 | 3.07E-03 | anti-apoptosis                                                                     |
| GO:0007443 | 3.07E-03 | Malpighian tubule morphogenesis                                                    |
| GO:0007140 | 3.17E-03 | male meiosis                                                                       |
| GO:0007346 | 3.17E-03 | regulation of mitotic cell cycle                                                   |
| GO:0007611 | 3.17E-03 | learning or memory                                                                 |
| GO:0007517 | 3.22E-03 | muscle organ development                                                           |
| GO:0002121 | 3.26E-03 | inter-male aggressive behavior                                                     |
| GO:0040018 | 3.94E-03 | positive regulation of multicellular organism growth                               |
| GO:0030261 | 3.94E-03 | chromosome condensation                                                            |
| GO:0046620 | 3.94E-03 | regulation of organ growth                                                         |
| GO:0048675 | 3.94E-03 | axon extension                                                                     |
| GO:0007297 | 3.94E-03 | ovarian follicle cell migration                                                    |
| GO:0008587 | 4.51E-03 | imaginal disc-derived wing margin morphogenesis                                    |
| GO:0035220 | 4.51E-03 | wing disc development                                                              |
| GO:0040014 | 4.51E-03 | regulation of multicellular organism growth                                        |
| GO:0048542 | 4.51E-03 | lymph gland development                                                            |
| GO:0007446 | 4.51E-03 | imaginal disc growth                                                               |
| GO:0002009 | 4.65E-03 | morphogenesis of an epithelium                                                     |
| GO:0006811 | 5.37E-03 | ion transport                                                                      |
| GO:0006979 | 5.47E-03 | response to oxidative stress                                                       |

|            |          |                                                                       |
|------------|----------|-----------------------------------------------------------------------|
| GO:0008361 | 5.61E-03 | regulation of cell size                                               |
| GO:0045570 | 5.61E-03 | regulation of imaginal disc growth                                    |
| GO:0045466 | 5.61E-03 | R7 cell differentiation                                               |
| GO:0007447 | 5.61E-03 | imaginal disc pattern formation                                       |
| GO:0046329 | 5.61E-03 | negative regulation of JNK cascade                                    |
| GO:0007301 | 5.61E-03 | ovarian ring canal formation                                          |
| GO:0007617 | 5.61E-03 | mating behavior                                                       |
| GO:0001700 | 5.93E-03 | embryonic development via the syncytial blastoderm                    |
| GO:0008105 | 6.60E-03 | asymmetric protein localization                                       |
| GO:0007304 | 6.60E-03 | chorion-containing eggshell formation                                 |
| GO:0045197 | 6.60E-03 | establishment or maintenance of epithelial cell apical/basal polarity |
| GO:0008345 | 6.60E-03 | larval locomotory behavior                                            |
| GO:0006836 | 6.60E-03 | neurotransmitter transport                                            |
| GO:0007379 | 6.60E-03 | segment specification                                                 |
| GO:0009880 | 6.60E-03 | embryonic pattern specification                                       |
| GO:0007017 | 6.61E-03 | microtubule-based process                                             |
| GO:0007280 | 6.88E-03 | pole cell migration                                                   |
| GO:0007548 | 6.88E-03 | sex differentiation                                                   |
| GO:0007173 | 7.43E-03 | epidermal growth factor receptor signaling pathway                    |
| GO:0030036 | 7.58E-03 | actin cytoskeleton organization                                       |
| GO:0007444 | 8.37E-03 | imaginal disc development                                             |
| GO:0016318 | 9.32E-03 | ommatidial rotation                                                   |
| GO:0007427 | 9.32E-03 | epithelial cell migration, open tracheal system                       |
| GO:0007157 | 1.00E-02 | heterophilic cell adhesion                                            |
| GO:0001751 | 1.00E-02 | compound eye photoreceptor cell differentiation                       |
| GO:0007349 | 1.00E-02 | cellularization                                                       |
| GO:0045610 | 1.00E-02 | regulation of hemocyte differentiation                                |
| GO:0007632 | 1.00E-02 | visual behavior                                                       |
| GO:0022416 | 1.00E-02 | bristle development                                                   |
| GO:0030178 | 1.00E-02 | negative regulation of Wnt receptor signaling pathway                 |
| GO:0016458 | 1.00E-02 | gene silencing                                                        |
| GO:0016360 | 1.00E-02 | sensory organ precursor cell fate determination                       |
| GO:0007552 | 1.00E-02 | metamorphosis                                                         |
| GO:0007528 | 1.00E-02 | neuromuscular junction development                                    |
| GO:0007428 | 1.00E-02 | primary branching, open tracheal system                               |
| GO:0019991 | 1.00E-02 | septate junction assembly                                             |
| GO:0007390 | 1.00E-02 | germ-band shortening                                                  |
| GO:0007369 | 1.00E-02 | gastrulation                                                          |
| GO:0007307 | 1.00E-02 | eggshell chorion gene amplification                                   |
| GO:0001708 | 1.00E-02 | cell fate specification                                               |
| GO:0000226 | 1.00E-02 | microtubule cytoskeleton organization                                 |
| GO:0035050 | 1.00E-02 | embryonic heart tube development                                      |
| GO:0055085 | 1.07E-02 | transmembrane transport                                               |
| GO:0007423 | 1.12E-02 | sensory organ development                                             |

|            |          |                                                                           |
|------------|----------|---------------------------------------------------------------------------|
| GO:0007163 | 1.19E-02 | establishment or maintenance of cell polarity                             |
| GO:0006357 | 1.26E-02 | regulation of transcription from RNA polymerase II promoter               |
| GO:0006325 | 1.34E-02 | chromatin organization                                                    |
| GO:0045944 | 1.41E-02 | positive regulation of transcription from RNA polymerase II promoter      |
| GO:0048666 | 1.41E-02 | neuron development                                                        |
| GO:0002168 | 1.46E-02 | instar larval development                                                 |
| GO:0016319 | 1.46E-02 | mushroom body development                                                 |
| GO:0006955 | 1.46E-02 | immune response                                                           |
| GO:0018991 | 1.54E-02 | oviposition                                                               |
| GO:0007067 | 1.54E-02 | mitosis                                                                   |
| GO:0030718 | 1.54E-02 | germ-line stem cell maintenance                                           |
| GO:0008595 | 1.54E-02 | determination of anterior/posterior axis, embryo                          |
| GO:0051533 | 1.54E-02 | positive regulation of NFAT protein import into nucleus                   |
| GO:0007259 | 1.54E-02 | JAK-STAT cascade                                                          |
| GO:0030536 | 1.54E-02 | larval feeding behavior                                                   |
| GO:0007519 | 1.54E-02 | skeletal muscle tissue development                                        |
| GO:0007501 | 1.54E-02 | mesodermal cell fate specification                                        |
| GO:0042059 | 1.54E-02 | negative regulation of epidermal growth factor receptor signaling pathway |
| GO:0060857 | 1.54E-02 | establishment of glial blood-brain barrier                                |
| GO:0006915 | 1.64E-02 | apoptosis                                                                 |
| GO:0007269 | 1.64E-02 | neurotransmitter secretion                                                |
| GO:0007015 | 1.83E-02 | actin filament organization                                               |
| GO:0007623 | 2.08E-02 | circadian rhythm                                                          |
| GO:0007409 | 2.08E-02 | axonogenesis                                                              |
| GO:0035147 | 2.20E-02 | branch fusion, open tracheal system                                       |
| GO:0008344 | 2.20E-02 | adult locomotory behavior                                                 |
| GO:0006914 | 2.20E-02 | autophagy                                                                 |
| GO:0008286 | 2.20E-02 | insulin receptor signaling pathway                                        |
| GO:0008103 | 2.20E-02 | oocyte microtubule cytoskeleton polarization                              |
| GO:0008347 | 2.20E-02 | glial cell migration                                                      |
| GO:0016567 | 2.23E-02 | protein ubiquitination                                                    |
| GO:0051726 | 2.23E-02 | regulation of cell cycle                                                  |
| GO:0009987 | 2.24E-02 | cellular process                                                          |
| GO:0007475 | 2.29E-02 | apposition of dorsal and ventral imaginal disc-derived wing surfaces      |
| GO:0007062 | 2.29E-02 | sister chromatid cohesion                                                 |
| GO:0007525 | 2.29E-02 | somatic muscle development                                                |
| GO:0001738 | 2.29E-02 | morphogenesis of a polarized epithelium                                   |
| GO:0007613 | 2.29E-02 | memory                                                                    |
| GO:0045746 | 2.29E-02 | negative regulation of Notch signaling pathway                            |
| GO:0009312 | 2.29E-02 | oligosaccharide biosynthetic process                                      |
| GO:0008293 | 2.29E-02 | torso signaling pathway                                                   |
| GO:0007088 | 2.61E-02 | regulation of mitosis                                                     |
| GO:0040007 | 2.61E-02 | growth                                                                    |
| GO:0042067 | 2.61E-02 | establishment of ommatidial polarity                                      |

|            |          |                                                                  |
|------------|----------|------------------------------------------------------------------|
| GO:0042127 | 2.61E-02 | regulation of cell proliferation                                 |
| GO:0035317 | 2.96E-02 | imaginal disc-derived wing hair organization                     |
| GO:0007530 | 2.96E-02 | sex determination                                                |
| GO:0006917 | 2.96E-02 | induction of apoptosis                                           |
| GO:0045475 | 2.96E-02 | locomotor rhythm                                                 |
| GO:0001736 | 2.96E-02 | establishment of planar polarity                                 |
| GO:0016311 | 2.96E-02 | dephosphorylation                                                |
| GO:0035071 | 3.01E-02 | salivary gland cell autophagic cell death                        |
| GO:0007169 | 3.32E-02 | transmembrane receptor protein tyrosine kinase signaling pathway |
| GO:0007629 | 3.32E-02 | flight behavior                                                  |
| GO:0001737 | 3.32E-02 | establishment of imaginal disc-derived wing hair orientation     |
| GO:0007362 | 3.32E-02 | terminal region determination                                    |
| GO:0051056 | 3.32E-02 | regulation of small GTPase mediated signal transduction          |
| GO:0006897 | 3.80E-02 | endocytosis                                                      |
| GO:0006396 | 4.00E-02 | RNA processing                                                   |
| GO:0016321 | 4.00E-02 | female meiosis chromosome segregation                            |
| GO:0007274 | 4.00E-02 | neuromuscular synaptic transmission                              |
| GO:0007310 | 4.00E-02 | oocyte dorsal/ventral axis specification                         |
| GO:0017148 | 4.00E-02 | negative regulation of translation                               |
| GO:0051017 | 4.73E-02 | actin filament bundle formation                                  |
| GO:0006865 | 4.80E-02 | amino acid transport                                             |
| GO:0016481 | 4.97E-02 | negative regulation of transcription                             |

---
