# Supplementary material
Source: PubMed Central journal article supplement (PMC4012493)
Supplement: supp_114.161463_TableS13.pdf [file supp_114.161463_TableS13.pdf]

**Table S13 GO term enrichment for molecular function in the North American cline for genes that overlap windows in the top 1% tail of Fst.**

| 1 % Tail Molecular Function |          |                                                          |
|-----------------------------|----------|----------------------------------------------------------|
| GO term                     | q-value  | description                                              |
| GO:0003700                  | 3.80E-07 | transcription factor activity                            |
| GO:0043565                  | 2.48E-05 | sequence-specific DNA binding                            |
| GO:0003704                  | 5.27E-05 | specific RNA polymerase II transcription factor activity |
| GO:0004672                  | 2.96E-04 | protein kinase activity                                  |
| GO:0005515                  | 5.34E-04 | protein binding                                          |
| GO:0000166                  | 5.34E-04 | nucleotide binding                                       |
| GO:0019992                  | 2.01E-03 | diacylglycerol binding                                   |
| GO:0016563                  | 3.32E-03 | transcription activator activity                         |
| GO:0004674                  | 7.09E-03 | protein serine/threonine kinase activity                 |
| GO:0003702                  | 7.18E-03 | RNA polymerase II transcription factor activity          |
| GO:0004725                  | 7.68E-03 | protein tyrosine phosphatase activity                    |
| GO:0008188                  | 7.68E-03 | neuropeptide receptor activity                           |
| GO:0008270                  | 1.08E-02 | zinc ion binding                                         |
| GO:0005509                  | 1.64E-02 | calcium ion binding                                      |
| GO:0042803                  | 1.89E-02 | protein homodimerization activity                        |
| GO:0003729                  | 1.89E-02 | mRNA binding                                             |
| GO:0004713                  | 2.04E-02 | protein tyrosine kinase activity                         |
| GO:0003677                  | 2.07E-02 | DNA binding                                              |
| GO:0003779                  | 2.20E-02 | actin binding                                            |
| GO:0003774                  | 2.55E-02 | motor activity                                           |
| GO:0008017                  | 3.42E-02 | microtubule binding                                      |
| GO:0020037                  | 3.96E-02 | heme binding                                             |
| GO:0003723                  | 4.02E-02 | RNA binding                                              |
| GO:0042623                  | 4.75E-02 | ATPase activity, coupled                                 |
| GO:0004930                  | 4.94E-02 | G-protein coupled receptor activity                      |
