# Supplementary material
Source: PubMed Central journal article supplement (PMC4012493)
Supplement: supp_114.161463_TableS14.pdf [file supp_114.161463_TableS14.pdf]

**Table S14 GO term enrichment for molecular function in the North American cline for genes that overlap windows in the top 2.5% tail of Fst.**

| 2.5% Tail Molecular Function |          |                                                          |
|------------------------------|----------|----------------------------------------------------------|
| GO term                      | q-value  | description                                              |
| GO:0003700                   | 4.16E-10 | transcription factor activity                            |
| GO:0043565                   | 1.61E-08 | sequence-specific DNA binding                            |
| GO:0005515                   | 2.23E-05 | protein binding                                          |
| GO:0005089                   | 4.38E-05 | Rho guanyl-nucleotide exchange factor activity           |
| GO:0003702                   | 1.09E-04 | RNA polymerase II transcription factor activity          |
| GO:0004714                   | 1.09E-04 | transmembrane receptor protein tyrosine kinase activity  |
| GO:0004871                   | 1.62E-04 | signal transducer activity                               |
| GO:0004672                   | 1.87E-04 | protein kinase activity                                  |
| GO:0008270                   | 2.93E-04 | zinc ion binding                                         |
| GO:0003707                   | 3.28E-04 | steroid hormone receptor activity                        |
| GO:0004879                   | 3.28E-04 | ligand-dependent nuclear receptor activity               |
| GO:0008227                   | 4.83E-04 | amine receptor activity                                  |
| GO:0003713                   | 5.28E-04 | transcription coactivator activity                       |
| GO:0008134                   | 7.22E-04 | transcription factor binding                             |
| GO:0000166                   | 7.22E-04 | nucleotide binding                                       |
| GO:0003729                   | 1.66E-03 | mRNA binding                                             |
| GO:0004713                   | 1.68E-03 | protein tyrosine kinase activity                         |
| GO:0003779                   | 1.76E-03 | actin binding                                            |
| GO:0005509                   | 1.89E-03 | calcium ion binding                                      |
| GO:0008188                   | 1.89E-03 | neuropeptide receptor activity                           |
| GO:0004674                   | 1.90E-03 | protein serine/threonine kinase activity                 |
| GO:0003704                   | 2.08E-03 | specific RNA polymerase II transcription factor activity |
| GO:0019992                   | 2.68E-03 | diacylglycerol binding                                   |
| GO:0008092                   | 2.68E-03 | cytoskeletal protein binding                             |
| GO:0004888                   | 2.68E-03 | transmembrane receptor activity                          |
| GO:0005096                   | 4.22E-03 | GTPase activator activity                                |
| GO:0003714                   | 4.22E-03 | transcription corepressor activity                       |
| GO:0004725                   | 5.05E-03 | protein tyrosine phosphatase activity                    |
| GO:0005524                   | 5.99E-03 | ATP binding                                              |
| GO:0016563                   | 7.45E-03 | transcription activator activity                         |
| GO:0005102                   | 7.82E-03 | receptor binding                                         |
| GO:0003677                   | 8.76E-03 | DNA binding                                              |
| GO:0042803                   | 9.25E-03 | protein homodimerization activity                        |
| GO:0005085                   | 1.00E-02 | guanyl-nucleotide exchange factor activity               |
| GO:0008017                   | 1.18E-02 | microtubule binding                                      |
| GO:0004930                   | 1.23E-02 | G-protein coupled receptor activity                      |
| GO:0003774                   | 1.87E-02 | motor activity                                           |
| GO:0003723                   | 1.95E-02 | RNA binding                                              |
| GO:0008083                   | 2.42E-02 | growth factor activity                                   |
| GO:0032183                   | 2.42E-02 | SUMO binding                                             |

|            |          |                            |
|------------|----------|----------------------------|
| GO:0042623 | 2.42E-02 | ATPase activity, coupled   |
| GO:0003676 | 4.34E-02 | nucleic acid binding       |
| GO:0003777 | 4.95E-02 | microtubule motor activity |

---
