# Supplementary material
Source: PubMed Central journal article supplement (PMC4012493)
Supplement: supp_114.161463_TableS15.pdf [file supp_114.161463_TableS15.pdf]

**Table S15 GO term enrichment for molecular function in the North American cline for genes that overlap windows in the top 5% tail of Fst.**

| 5% Tail Molecular Function |          |                                                                     |
|----------------------------|----------|---------------------------------------------------------------------|
| GO term                    | q-value  | description                                                         |
| GO:0019904                 | 0.00E+00 | protein domain specific binding                                     |
| GO:0003700                 | 9.43E-13 | transcription factor activity                                       |
| GO:0043565                 | 5.69E-09 | sequence-specific DNA binding                                       |
| GO:0005515                 | 6.05E-09 | protein binding                                                     |
| GO:0005089                 | 1.47E-07 | Rho guanyl-nucleotide exchange factor activity                      |
| GO:0003704                 | 1.19E-06 | specific RNA polymerase II transcription factor activity            |
| GO:0005509                 | 6.53E-06 | calcium ion binding                                                 |
| GO:0004871                 | 1.82E-05 | signal transducer activity                                          |
| GO:0008270                 | 4.25E-05 | zinc ion binding                                                    |
| GO:0003702                 | 5.31E-05 | RNA polymerase II transcription factor activity                     |
| GO:0016563                 | 6.32E-05 | transcription activator activity                                    |
| GO:0017147                 | 7.70E-05 | Wnt-protein binding                                                 |
| GO:0004674                 | 2.20E-04 | protein serine/threonine kinase activity                            |
| GO:0004714                 | 3.05E-04 | transmembrane receptor protein tyrosine kinase activity             |
| GO:0005267                 | 3.09E-04 | potassium channel activity                                          |
| GO:0008188                 | 3.09E-04 | neuropeptide receptor activity                                      |
| GO:0003779                 | 4.30E-04 | actin binding                                                       |
| GO:0008017                 | 5.96E-04 | microtubule binding                                                 |
| GO:0004879                 | 8.37E-04 | ligand-dependent nuclear receptor activity                          |
| GO:0003707                 | 8.37E-04 | steroid hormone receptor activity                                   |
| GO:0004672                 | 8.90E-04 | protein kinase activity                                             |
| GO:0005041                 | 1.27E-03 | low-density lipoprotein receptor activity                           |
| GO:0004888                 | 1.63E-03 | transmembrane receptor activity                                     |
| GO:0003713                 | 1.63E-03 | transcription coactivator activity                                  |
| GO:0004713                 | 1.88E-03 | protein tyrosine kinase activity                                    |
| GO:0008227                 | 2.12E-03 | amine receptor activity                                             |
| GO:0008134                 | 2.31E-03 | transcription factor binding                                        |
| GO:0005326                 | 2.31E-03 | neurotransmitter transporter activity                               |
| GO:0004889                 | 3.22E-03 | nicotinic acetylcholine-activated cation-selective channel activity |
| GO:0005524                 | 3.50E-03 | ATP binding                                                         |
| GO:0032183                 | 4.08E-03 | SUMO binding                                                        |
| GO:0003714                 | 5.58E-03 | transcription corepressor activity                                  |
| GO:0005096                 | 5.58E-03 | GTPase activator activity                                           |
| GO:0005102                 | 7.22E-03 | receptor binding                                                    |
| GO:0003677                 | 7.22E-03 | DNA binding                                                         |
| GO:0004725                 | 1.73E-02 | protein tyrosine phosphatase activity                               |
| GO:0008092                 | 1.97E-02 | cytoskeletal protein binding                                        |
| GO:0005112                 | 2.38E-02 | Notch binding                                                       |
| GO:0042803                 | 2.51E-02 | protein homodimerization activity                                   |
| GO:0042623                 | 2.97E-02 | ATPase activity, coupled                                            |

|            |          |                                                        |
|------------|----------|--------------------------------------------------------|
| GO:0005085 | 3.07E-02 | guanyl-nucleotide exchange factor activity             |
| GO:0030528 | 3.28E-02 | transcription regulator activity                       |
| GO:0004930 | 3.32E-02 | G-protein coupled receptor activity                    |
| GO:0000166 | 4.61E-02 | nucleotide binding                                     |
| GO:0000287 | 4.61E-02 | magnesium ion binding                                  |
| GO:0004653 | 4.93E-02 | polypeptide N-acetylgalactosaminyltransferase activity |
| GO:0050839 | 4.93E-02 | cell adhesion molecule binding                         |
| GO:0003729 | 4.93E-02 | mRNA binding                                           |
| GO:0019992 | 4.98E-02 | diacylglycerol binding                                 |

---
