# Supplementary material
Source: PubMed Central journal article supplement (PMC4012493)
Supplement: supp_114.161463_TableS16.pdf [file supp_114.161463_TableS16.pdf]

**Table S16 GO term enrichment for cellular component in the North American cline for genes that overlap windows in the top 1% tail of Fst.**

| 1 % Tail Cellular Component |          |                                |
|-----------------------------|----------|--------------------------------|
| GO term                     | q-value  | description                    |
| GO:0005634                  | 6.87E-09 | nucleus                        |
| GO:0005622                  | 4.74E-03 | intracellular                  |
| GO:0005886                  | 4.74E-03 | plasma membrane                |
| GO:0016021                  | 2.47E-02 | integral to membrane           |
| GO:0005875                  | 2.47E-02 | microtubule associated complex |
| GO:0005938                  | 2.47E-02 | cell cortex                    |
| GO:0005887                  | 2.47E-02 | integral to plasma membrane    |
| GO:0016020                  | 2.93E-02 | membrane                       |
| GO:0005737                  | 4.09E-02 | cytoplasm                      |
| GO:0005794                  | 4.95E-02 | Golgi apparatus                |
