# Supplementary material
Source: PubMed Central journal article supplement (PMC4012493)
Supplement: supp_114.161463_TableS17.pdf [file supp_114.161463_TableS17.pdf]

**Table S17 GO term enrichment for cellular component in the North American cline for genes that overlap windows in the top 2.5% tail of Fst.**

| 2.5% Tail Cellular Component |          |                                    |
|------------------------------|----------|------------------------------------|
| GO term                      | q-value  | description                        |
| GO:0005634                   | 2.94E-12 | nucleus                            |
| GO:0005886                   | 8.90E-10 | plasma membrane                    |
| GO:0005737                   | 1.72E-04 | cytoplasm                          |
| GO:0045211                   | 8.60E-04 | postsynaptic membrane              |
| GO:0016021                   | 8.60E-04 | integral to membrane               |
| GO:0005622                   | 8.60E-04 | intracellular                      |
| GO:0005578                   | 8.60E-04 | proteinaceous extracellular matrix |
| GO:0045179                   | 8.60E-04 | apical cortex                      |
| GO:0005887                   | 1.11E-03 | integral to plasma membrane        |
| GO:0045202                   | 2.75E-03 | synapse                            |
| GO:0005918                   | 3.83E-03 | septate junction                   |
| GO:0005875                   | 4.55E-03 | microtubule associated complex     |
| GO:0016459                   | 6.83E-03 | myosin complex                     |
| GO:0005794                   | 1.15E-02 | Golgi apparatus                    |
| GO:0005938                   | 1.15E-02 | cell cortex                        |
| GO:0005576                   | 2.29E-02 | extracellular region               |
| GO:0005912                   | 2.30E-02 | adherens junction                  |
| GO:0005700                   | 2.37E-02 | polytene chromosome                |
| GO:0016020                   | 4.28E-02 | membrane                           |
| GO:0008021                   | 4.90E-02 | synaptic vesicle                   |
