# Supplementary material
Source: PubMed Central journal article supplement (PMC4012493)
Supplement: supp_114.161463_TableS18.pdf [file supp_114.161463_TableS18.pdf]

**Table S18 GO term enrichment for cellular component in the North American cline for genes that overlap windows in the top 5% tail of Fst.**

| GO term    | 5% Tail Cellular Component |                                                        |
|------------|----------------------------|--------------------------------------------------------|
|            | q-value                    | description                                            |
| GO:0005634 | 6.54E-12                   | nucleus                                                |
| GO:0005886 | 5.50E-10                   | plasma membrane                                        |
| GO:0005622 | 5.70E-07                   | intracellular                                          |
| GO:0005737 | 2.14E-04                   | cytoplasm                                              |
| GO:0045179 | 2.14E-04                   | apical cortex                                          |
| GO:0005578 | 4.05E-04                   | proteinaceous extracellular matrix                     |
| GO:0016021 | 4.33E-04                   | integral to membrane                                   |
| GO:0005887 | 9.71E-04                   | integral to plasma membrane                            |
| GO:0035003 | 9.71E-04                   | subapical complex                                      |
| GO:0005938 | 1.01E-03                   | cell cortex                                            |
| GO:0009986 | 1.09E-03                   | cell surface                                           |
| GO:0005918 | 1.47E-03                   | septate junction                                       |
| GO:0045211 | 2.63E-03                   | postsynaptic membrane                                  |
| GO:0005875 | 3.15E-03                   | microtubule associated complex                         |
| GO:0005892 | 3.25E-03                   | nicotinic acetylcholine-gated receptor-channel complex |
| GO:0016324 | 3.57E-03                   | apical plasma membrane                                 |
| GO:0016459 | 1.42E-02                   | myosin complex                                         |
| GO:0005768 | 1.42E-02                   | endosome                                               |
| GO:0005794 | 1.64E-02                   | Golgi apparatus                                        |
| GO:0005795 | 1.90E-02                   | Golgi stack                                            |
| GO:0045172 | 2.14E-02                   | germline ring canal                                    |
| GO:0030135 | 2.14E-02                   | coated vesicle                                         |
| GO:0000775 | 2.40E-02                   | chromosome, centromeric region                         |
| GO:0005813 | 3.04E-02                   | centrosome                                             |
| GO:0045177 | 3.04E-02                   | apical part of cell                                    |
| GO:0005868 | 3.04E-02                   | cytoplasmic dynein complex                             |
| GO:0005912 | 3.39E-02                   | adherens junction                                      |
| GO:0045202 | 3.69E-02                   | synapse                                                |
| GO:0005874 | 3.69E-02                   | microtubule                                            |
| GO:0043190 | 4.14E-02                   | ATP-binding cassette (ABC) transporter complex         |
| GO:0005576 | 4.25E-02                   | extracellular region                                   |
| GO:0016020 | 4.75E-02                   | membrane                                               |
