# Supplementary material
Source: PubMed Central journal article supplement (PMC4012493)
Supplement: supp_114.161463_TableS19.pdf [file supp_114.161463_TableS19.pdf]

**Table S19 Annotations of single nucleotide polymorphisms present on both continents**

---

|                 | All shared SNPs | All convergent SNPs | Strongly convergent SNPs (top 10% FST on both continents) |
|-----------------|-----------------|---------------------|-----------------------------------------------------------|
| All annotations | 361171          | 229705              | 4038                                                      |
| Three Prime UTR | 11399           | 6552                | 107                                                       |
| Five prime UTR  | 8684            | 5107                | 99                                                        |
| Nonsynonymous   | 13526           | 8811                | 147                                                       |
| Synonymous      | 45398           | 29450               | 499                                                       |
| Intronic        | 150302          | 97021               | 1754                                                      |
| Intergenic      | 131799          | 82754               | 1432                                                      |

---
