# Supplementary material
Source: PubMed Central journal article supplement (PMC4012493)
Supplement: supp_114.161463_TableS21.pdf [file supp_114.161463_TableS21.pdf]

**Table S21 Functional annotation of extremely differentiated convergent SNPs**

| Chr | Position | SNP classification | Fbgn        | Gene Name                     | Functional Summary                                | AUFST    | NAFST    | Codon change | AA change |
|-----|----------|--------------------|-------------|-------------------------------|---------------------------------------------------|----------|----------|--------------|-----------|
| 3R  | 15229365 | five prime UTR     | FBgn0038704 | Aprataxin-like protein        | DNA repair, metal binding                         | 5.24E-01 | 6.31E-01 | NA           | NA        |
| 3R  | 12842274 | five prime UTR     | FBgn0004577 | Dmel_CG15337                  | Unknown                                           | 5.26E-01 | 5.22E-01 | NA           | NA        |
| X   | 8054656  | nonsynonymous      | FBgn0030014 | Dmel_CG31091                  | lipid and ester catabolism                        | 5.12E-01 | 4.65E-01 | ATG->TTG     | M->L      |
| 2R  | 7013061  | nonsynonymous      | FBgn0053503 | Dmel_CG4218                   | Unknown                                           | 8.23E-01 | 6.75E-01 | TTA->TCA     | L->S      |
| 2L  | 14547899 | nonsynonymous      | FBgn0250844 | Dmel_CG6454                   | calcium channel membrane targeting                | 5.12E-01 | 4.65E-01 | AAG->ATG     | K->M      |
| 3R  | 20766471 | nonsynonymous      | FBgn0029157 | Peroxidase                    | response to oxidative stress /peroxide metabolism | 8.23E-01 | 5.46E-01 | TTG->TTC     | L->F      |
| 3R  | 20177828 | nonsynonymous      | FBgn0039187 | Probable cytochrome P450 12d1 | oxidation/reduction, metal binding                | 6.44E-01 | 6.45E-01 | ACT->AGT     | T->S      |
| 3R  | 21727544 | nonsynonymous      | FBgn0051091 | slingshot                     | eye development/mushroom body development         | 7.39E-01 | 7.55E-01 | TCC->GCC     | S->A      |
