# Supplementary material
Source: PubMed Central journal article supplement (PMC4012493)
Supplement: supp_114.161463_TableS22.pdf [file supp_114.161463_TableS22.pdf]

**Table S22 Candidate convergent nonsynonymous SNPs**

| Position       | N1              | N2 | Fst  | Codon   | AA  | mel and outgroup ref sequence state                       |
|----------------|-----------------|----|------|---------|-----|-----------------------------------------------------------|
| hkl            |                 |    |      |         |     |                                                           |
| AUS 19,045,921 | 20              | 29 | 0.34 | aac/gac | N/D | D= mel,sim, sech, yak, ere; Q = ana                       |
| AUS 19,045,936 | 20              | 30 | 0.21 | aaa/gaa | K/E | many changes from E to K and reverse                      |
| NA 19,045,921  | not segregating |    |      |         |     |                                                           |
| NA 19,045,936  | not segregating |    |      |         |     |                                                           |
| NA 19,046,788  | 28              | 34 | 0.35 | aca/cca | T/P | P = mel,sim, sech, yak, ere, ana; other species not T     |
| NA 19,046,828  | 29              | 27 | 0.48 | aac/agc | N/S | S=mel,sim,sech,ana,pse,pers,vir,moj,grim; T = ere, L=will |
| AUS 19,046,788 | not segregating |    |      |         |     |                                                           |
| AUS 19,046,828 | not segregating |    |      |         |     |                                                           |
| otk            |                 |    |      |         |     |                                                           |
| AUS 7,890,468  | 29              | 22 | 0.38 | gtg/ctg | V/L | L = all species                                           |
| AUS 7,890,646  | 18              | 26 | 0.33 | gat/gag | D/E | D = mel; E = other species                                |
| AUS 7,901,503  | 36              | 43 | 0.26 | ttg/tcg | L/S | L = all species                                           |
| NA 7,890,468   | not segregating |    |      |         |     |                                                           |
| NA 7,890,646   | not segregating |    |      |         |     |                                                           |
| NA 7,901,503   | not segregating |    |      |         |     |                                                           |
| NA 7,892,834   |                 |    | 0.71 | tct/gct |     | S/A                                                       |
| NA 7,892,839   |                 |    | 0.70 | agc/aac | S/N |                                                           |
| AUS 7,892,834  | not segregating |    |      |         |     |                                                           |
| AUS 7,892,839  | not segregating |    |      |         |     |                                                           |

| Position       | N1              | N2 | Fst   | Codon   | AA  | mel and outgroup ref sequence state |
|----------------|-----------------|----|-------|---------|-----|-------------------------------------|
| ana1           |                 |    |       |         |     |                                     |
| AUS 20,359,353 | 31              | 37 | 0.36  | gag/gcg | E/A | E=mel;A=sim,sech,yak,ere            |
| AUS 20,359,385 | 33              | 36 | 0.45  | cga/gga | R/G | R=mel,sim,yak,ere,ana               |
| NA 20,359,353  | 15              | 49 | 0.007 |         |     |                                     |
| NA 20,359,385  | not segregating |    |       |         |     |                                     |

|                |    |    |       |         |         |                                                                    |
|----------------|----|----|-------|---------|---------|--------------------------------------------------------------------|
| NA 20,360,921  | 36 | 52 | 0.33  | atg/ctg | M/L     | L=all flies except virilis; virilis=M                              |
| NA 20,361,171  | 36 | 39 | 0.38  | cag/ctg | Q/L     | Q= mel, si, sech,yak, pse, pers. will, moj; R=ere;H=ana;L=vir, gri |
| AUS 20,360,921 | 43 | 28 | 0.007 |         |         |                                                                    |
| AUS 20,361,171 | 35 | 27 | 0.06  |         |         |                                                                    |
| Chm            |    |    |       |         |         |                                                                    |
| AUS 7,413,693  | 23 | 29 | 0.52  | cag/gag | Q/E     | Q= all species                                                     |
| NA 7,413,693   |    |    |       |         |         | not segregating                                                    |
| NA 7,412,813   |    | 30 | 56    | 0.24    | gat/tat | D/Y Y=mel;D=si, sech, yak, ere, ana, wil, vir, moj, gri;E=pse,pers |
| NA 7,413,132   |    | 23 | 36    | 0.22    | cca/cga | P/R R=all species; no data for willistoni                          |
| AUS 7,412,813  |    |    |       |         |         | not segregating                                                    |
| AUS 7,413,132  |    |    |       |         |         | not segregating                                                    |
| Trp            |    |    |       |         |         |                                                                    |
| AUS 25,740,476 | 20 | 24 | 0.35  | ggc/agc | G/S     | S=mel;G=sim,sech,yak,ere,ana,;A=pse;T=will, other no data          |
| AUS 25,741,376 | 36 | 27 | 0.22  | tca/cca | S/P     | P=mel,si,sech,ya,ere,ana,pse,pers,will;T=vir,gri;others ND         |
| NA 25,740,476  | 38 | 52 | 0.02  |         |         |                                                                    |
| NA 25,741,376  | 36 | 56 | 0.06  |         |         |                                                                    |
| NA 25,741,665  | 27 | 28 | 0.34  | ttc/tcc | F/S     | S=mel,sim,sech,yak,ere;A=ana,pse.pers.will.moj.gri                 |
| NA 25,743,316  | 32 | 40 | 0.24  | cac/aac | H/N     | N=ana; H=all other species                                         |
| AUS 25,741,665 |    |    |       |         |         | not segregating                                                    |
| AUS 25,743,316 | 27 | 18 | 0.10  |         |         |                                                                    |

---

CANDIDATE NORTH AMERICAN SPECIFIC DIFFERENTIATED NONSYNONYMOUS SNPS

| Gene          | Position   | N1                     | N2 | Fst  | codon   | residue | references sequence states                                |
|---------------|------------|------------------------|----|------|---------|---------|-----------------------------------------------------------|
| Lsp2 (3L)     | 12,122,543 | 37                     | 36 | 0.41 | atg/gtg | M/V     | V=mel,sim,sech,yak,ere,ana,pse,pers,grim;<br>L=wil,vi,moj |
|               |            | Not segregating in AUS |    |      |         |         |                                                           |
| Oatp33Ea (2L) | 12,442,835 | 31                     | 65 | 0.50 | tgt/ggt | C/G     | L=all species                                             |
| In AUS        |            | 29                     | 37 | 0.08 |         |         |                                                           |

---
