# Supplementary material
Source: PubMed Central journal article supplement (PMC4012493)
Supplement: supp_114.161463_TableS23.pdf [file supp_114.161463_TableS23.pdf]

**Table S23.**

---

| Seed length | Average coverage |      | Number of fixed or polymorphic bases |       | Number of singleton bases |        |
|-------------|------------------|------|--------------------------------------|-------|---------------------------|--------|
|             | 30               | 45   | 30                                   | 45    | 30                        | 45     |
| k1n3        | 25.4             | 25.1 | 15801                                | 15336 | 74753                     | 72716  |
| k2n5        | 30               | 29.9 | 19737                                | 19522 | 149263                    | 148169 |
| k3n7        | 32               | 32   | 22457                                | 22306 | 157904                    | 157193 |
| k4n9        | 32.4             | 32.4 | 23891                                | 23744 | 160718                    | 160294 |

---

s = seed length k = number of errors allowed in the seed

n = number of errors allowed in the entire read
