# Supplementary material
Source: PubMed Central journal article supplement (PMC4012493)
Supplement: supp_114.161463_TableS24.pdf [file supp_114.161463_TableS24.pdf]

**Table S24 Genome-wide average pairwise 1KB window Fst**

|       | FLA | MAINE | QUE   | TAZ   |
|-------|-----|-------|-------|-------|
| FLA   | -   | 0.066 | 0.063 | 0.077 |
| MAINE | -   | -     | 0.066 | 0.067 |
| QUE   | -   | -     | -     | 0.072 |
| TAZ   | -   | -     | -     | -     |
