# Supplementary material
Source: PubMed Central journal article supplement (PMC4012493)
Supplement: supp_114.161463_TableS27.pdf [file supp_114.161463_TableS27.pdf]

**Table S27 Chr2R average pairwise 1KB window Fst**

|       | FLA | MAINE | QUE   | TAZ   |
|-------|-----|-------|-------|-------|
| FLA   | -   | 0.062 | 0.064 | 0.073 |
| MAINE | -   | -     | 0.062 | 0.067 |
| QUE   | -   | -     | -     | 0.067 |
| TAZ   | -   | -     | -     | -     |
