# Supplementary material
Source: PubMed Central journal article supplement (PMC4012493)

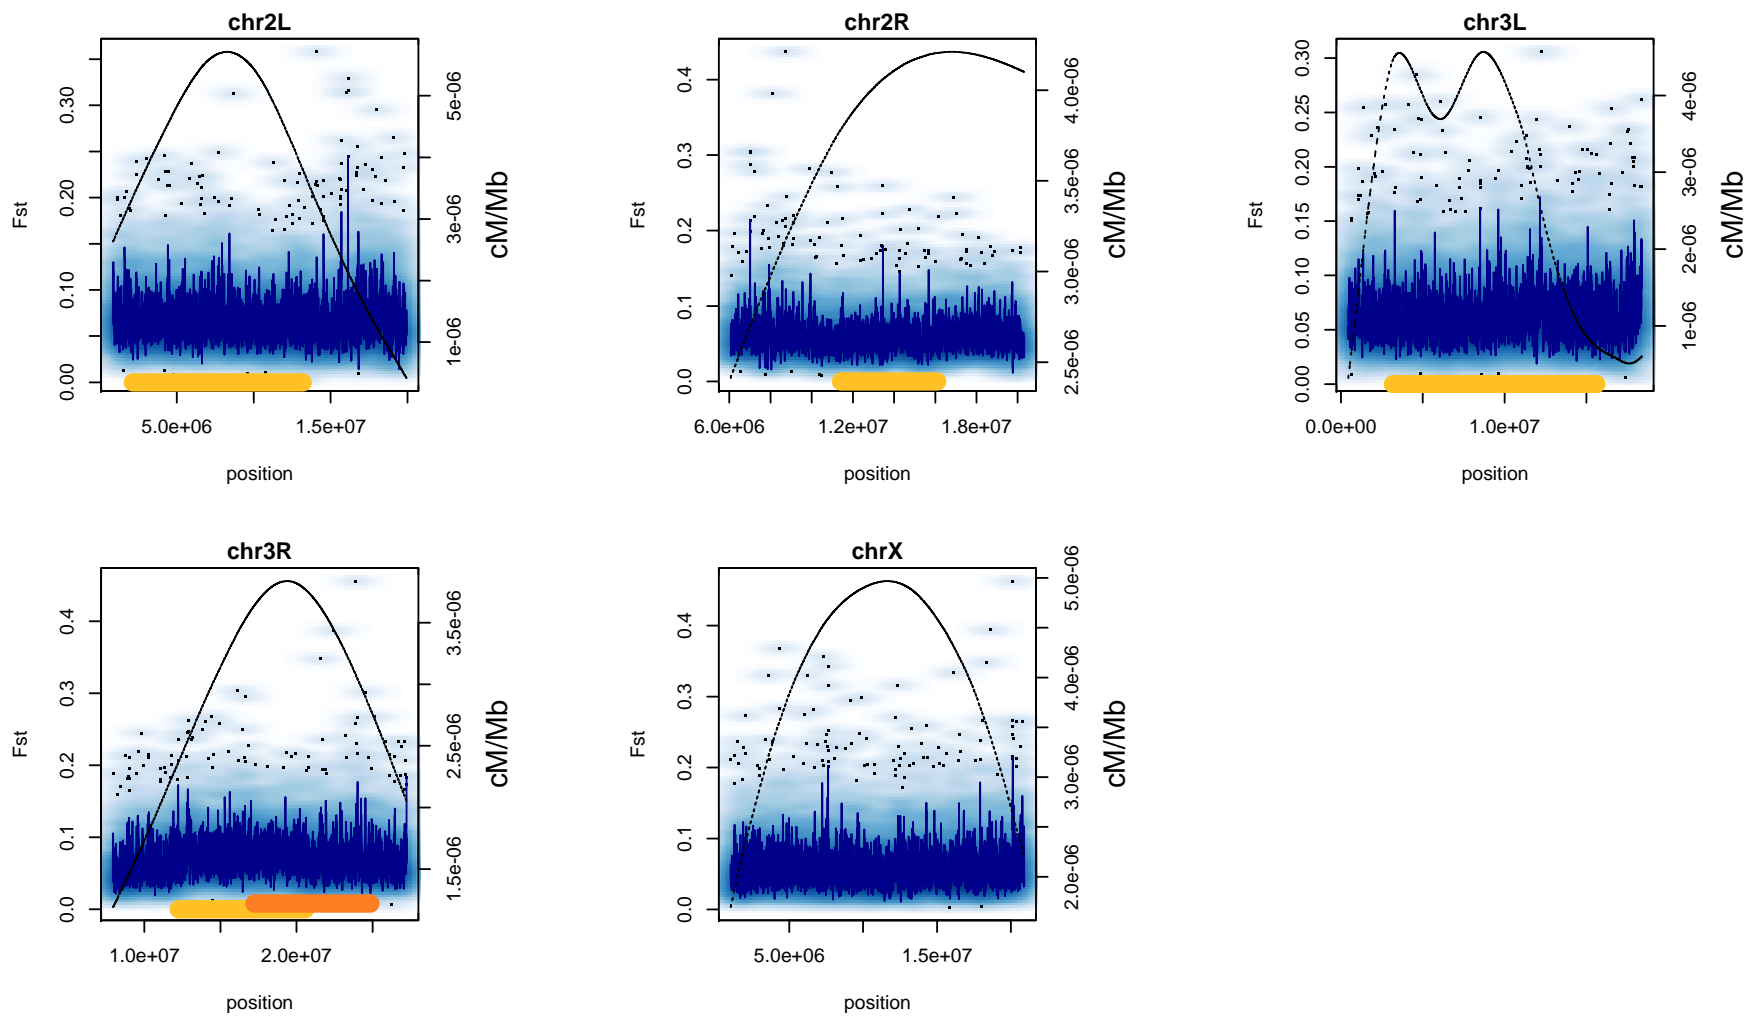

**Figure S1** Australian cline Fst across chromosome arms

Supplement: supp_114.161463_FigureS1.pdf [file supp_114.161463_FigureS1.pdf]

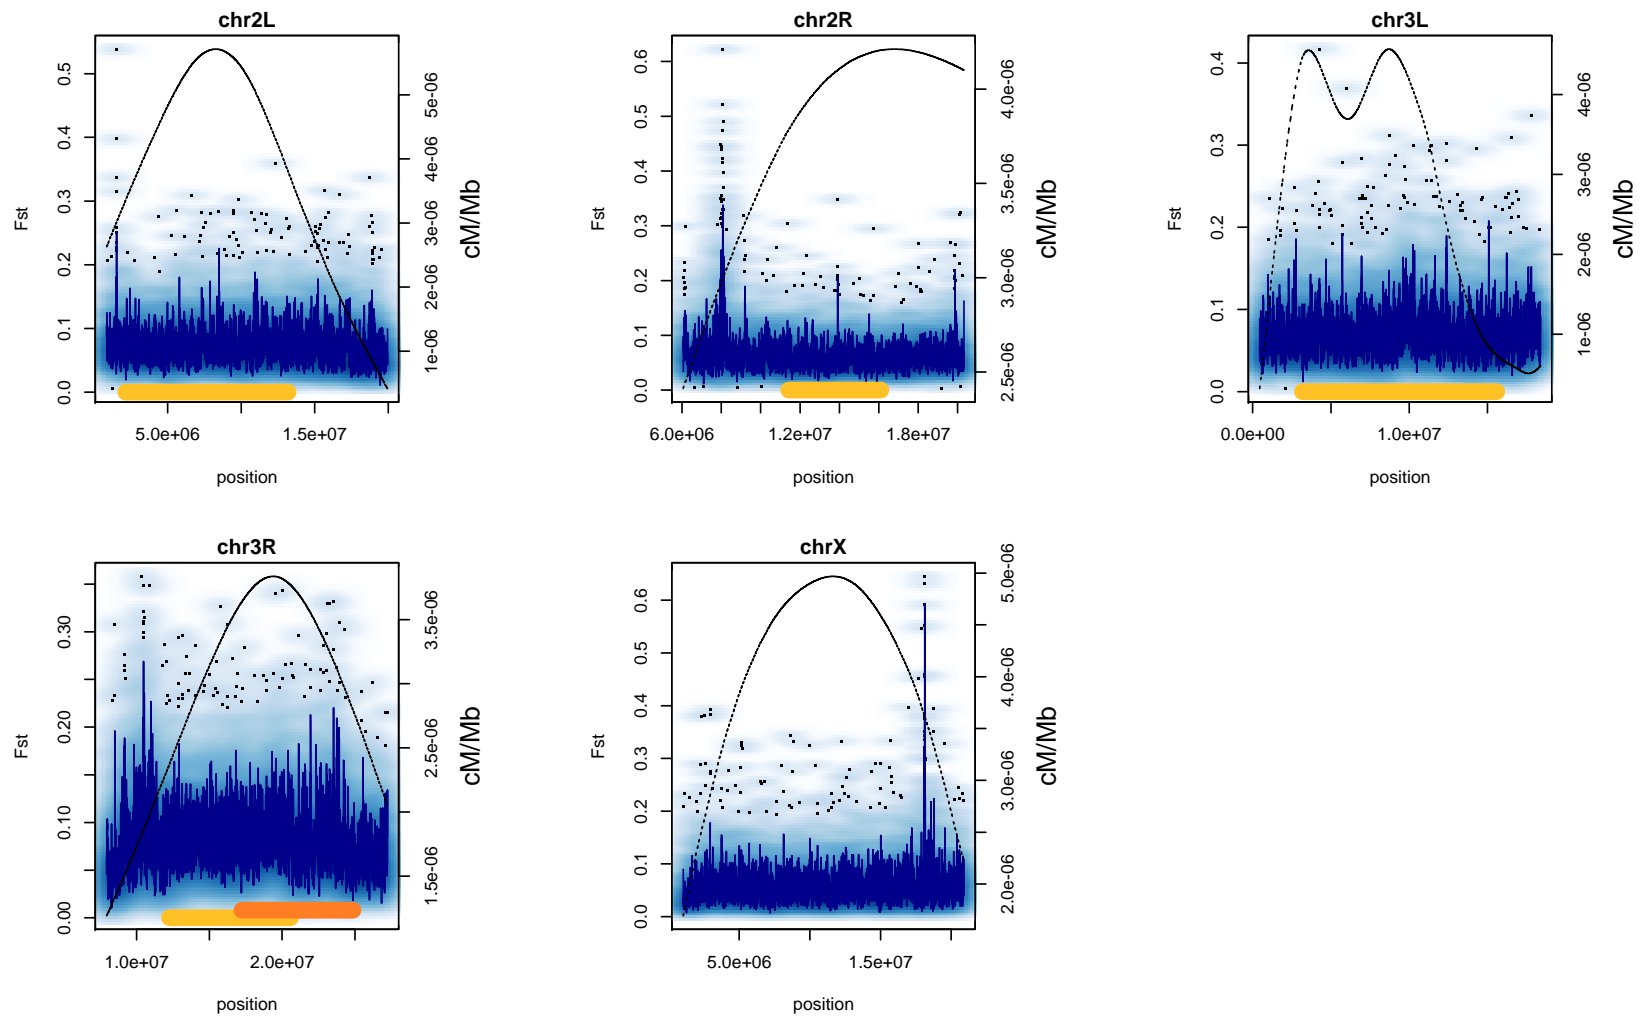

**Figure S2** North American cline Fst across chromosome arms

Supplement: supp_114.161463_FigureS2.pdf [file supp_114.161463_FigureS2.pdf]

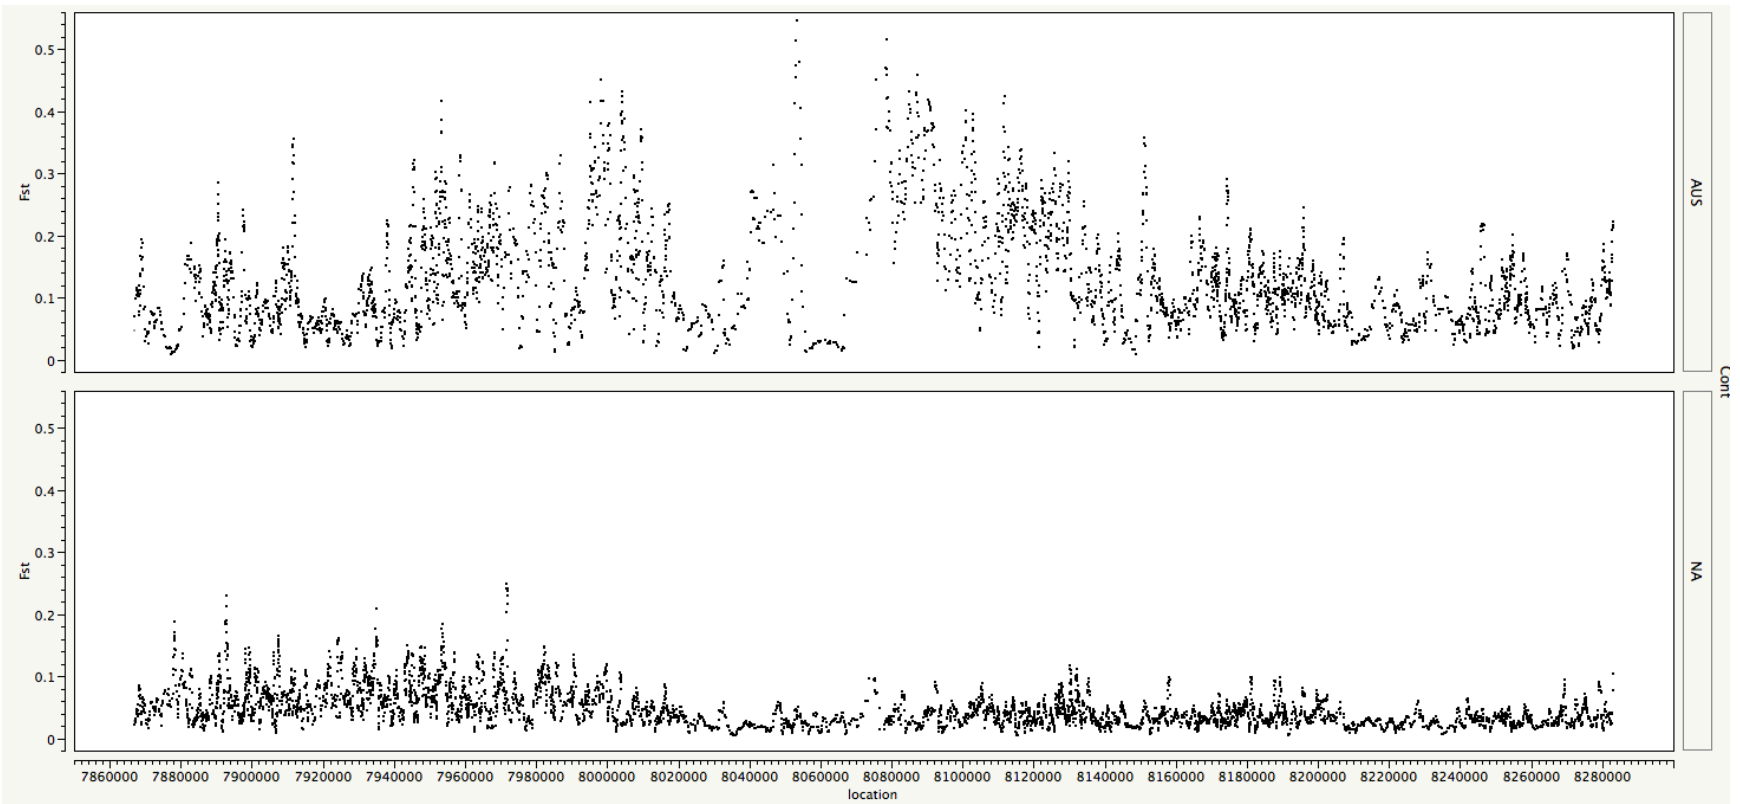

**Figure S3** Comparison of Fst between continents in Cyp6G1 region

Supplement: supp_114.161463_FigureS3.pdf [file supp_114.161463_FigureS3.pdf]

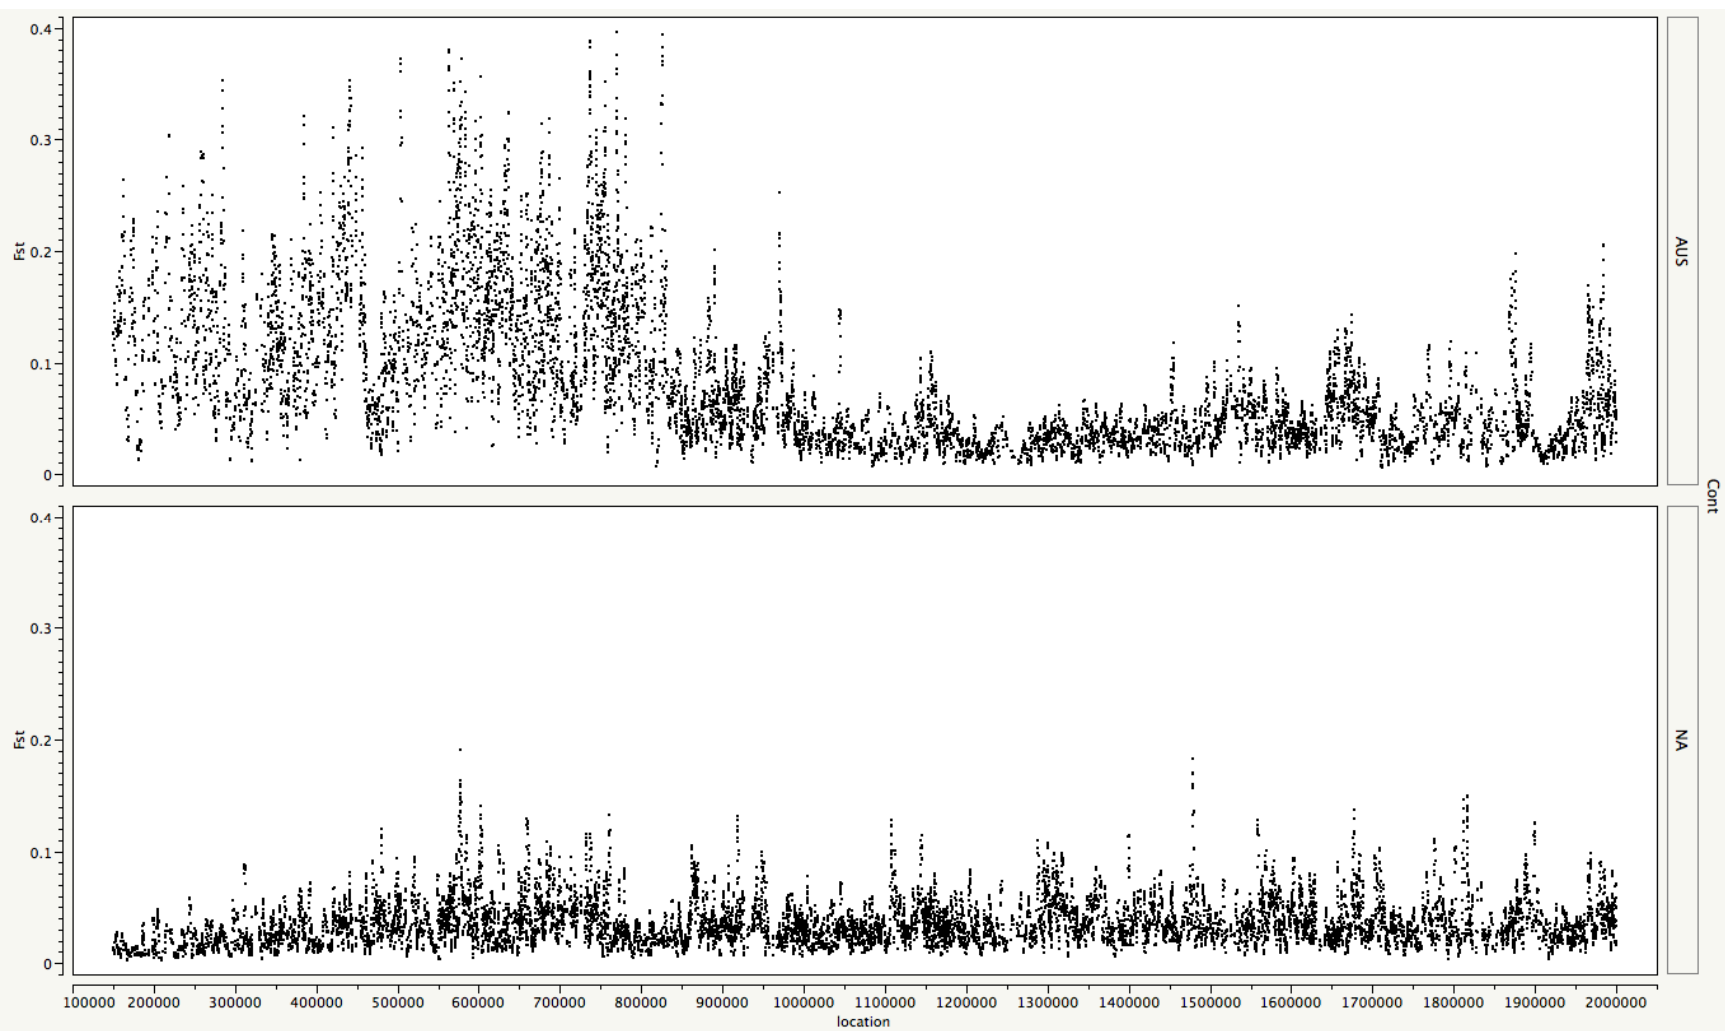

**Figure S4** Comparison of Fst between continents at tip of chromosome X

Supplement: supp_114.161463_FigureS4.pdf [file supp_114.161463_FigureS4.pdf]

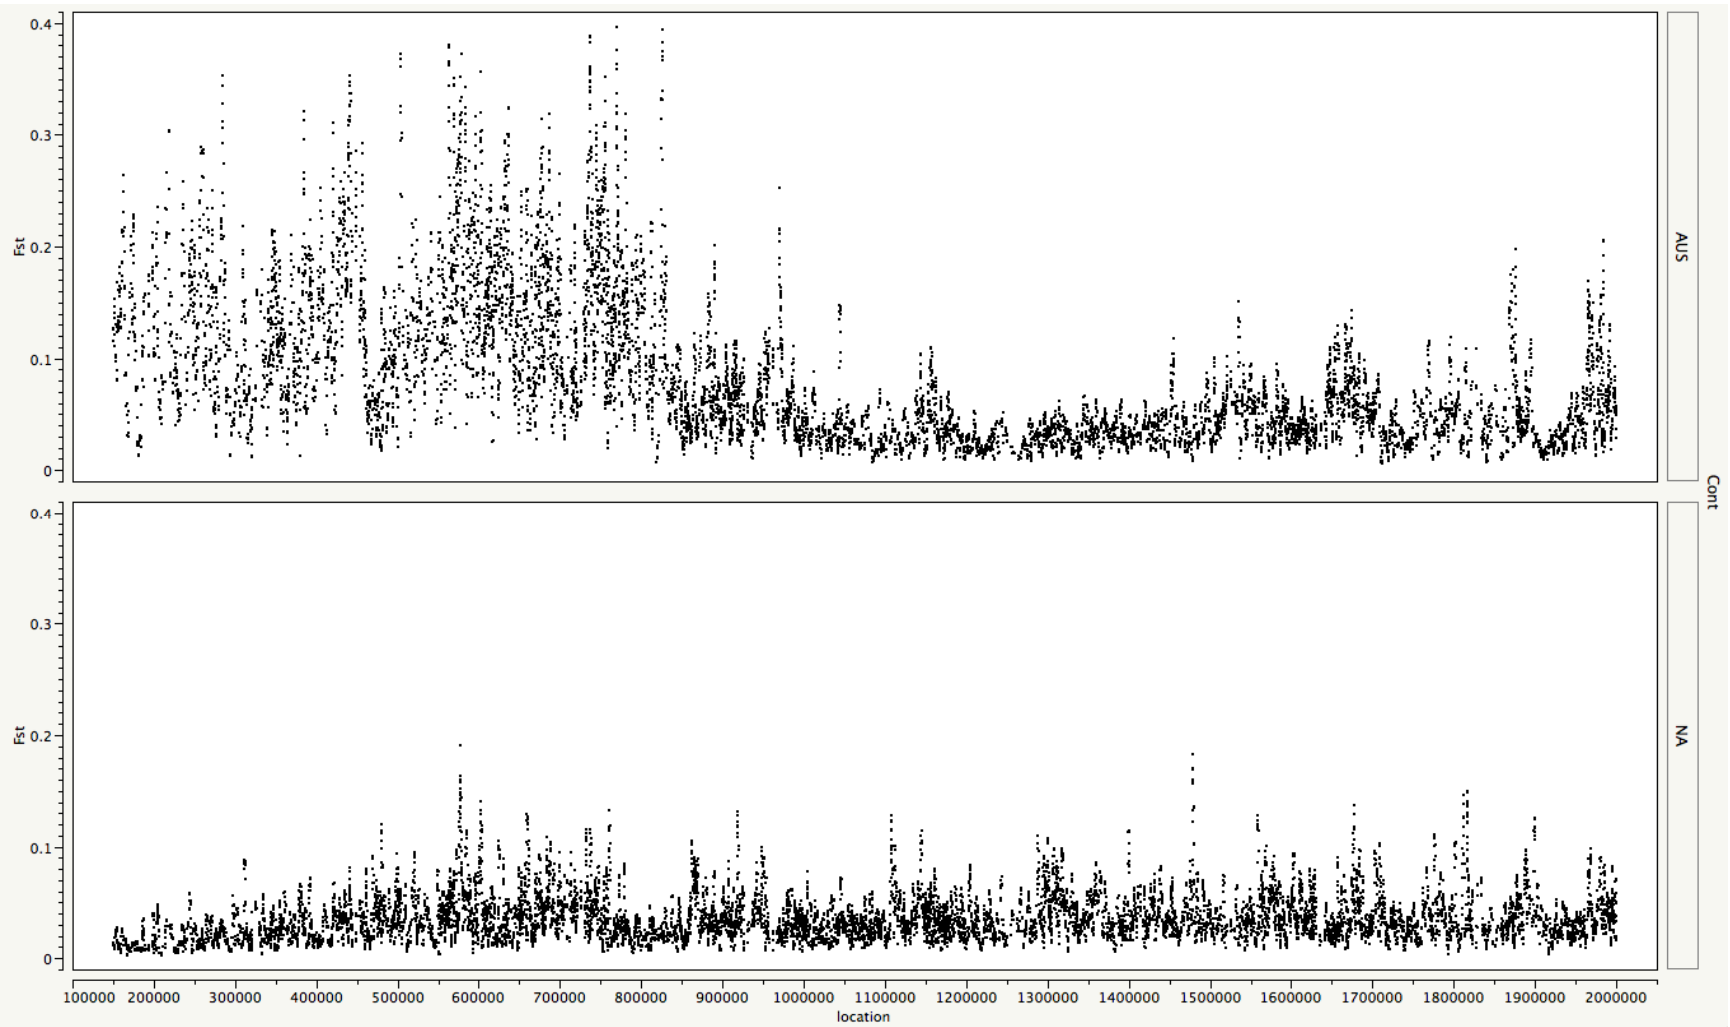

**Figure S5** Comparison of Fst between continents in Upd2 region

Supplement: supp_114.161463_FigureS5.pdf [file supp_114.161463_FigureS5.pdf]
